# Supplementary material for: Association Between Dietary Inflammatory Index and S-Klotho Plasma Levels in Middle-Aged and Elderly People
Source: Front Nutr. 2022 May 10;9:853332. doi: 10.3389/fnut.2022.853332 (PMC9127966; doi:10.3389/fnut.2022.853332)
Supplement: Supplementary file 1 [file Data_Sheet_1.xls]

SEQN	DMDEDUC2	DMDHREDU	RIAGENDR	RIDAGEYR	RIDRETH1	WTINT2YR	WTMEC2YR	BMXBMI	BMXWAIST	BMXWT	BPXDI1	BPXSY1	SSKLOTH	RXDUSE	DR1IKCAL	YEAR	DII
43678	4	2	1	43	3	22505.36051	22501.08015	38.85	132.5	132.4	68	132	712.4	1	3644	2007-2008	0.283943697
43679	5	3	1	56	3	82326.83785	82477.36674	27.16	99.2	82.7	82	134	536.8	2	2184	2007-2008	-1.156817246
43680	5	5	2	57	2	11859.84338	12033.52968	31.17	102.5	78.3	64	106	868	1	1077	2007-2008	1.220548565
43683	4	3	1	54	3	82326.83785	82477.36674	25.56	93.9	77.3	92	138	718.1	1	4727	2007-2008	0.727601557
43684	1	1	1	67	1	9618.801295	10649.66037	26.38	95.6	70.1	82	174	972.8	2	1573	2007-2008	-0.514176868
43688	5	5	2	47	1	25274.17312	25651.32401	22.1	79.1	59.5	66	120	691	2	1577	2007-2008	0.867621504
43691	2	2	2	44	3	23547.18794	23378.79093	20.77	79.2	53.3	86	136	751.9	2	2192	2007-2008	0.23719635
43697	5	5	1	79	3	30052.77379	29506.01983	25.3	107.5	86.2	70	130	977.6	1	2380	2007-2008	-0.553120044
43699	3	3	1	61	4	6451.240943	6409.686933	17.75	74.7	55.1	74	96	948.3	2	3624	2007-2008	-1.786879083
43708	4	4	1	51	2	11086.85851	11432.68127	33.08	102.8	95.6	66	136	1675.3	2	3815	2007-2008	-2.781746154
43710	5	5	1	50	3	94535.82528	105297.5949	38.22	122.7	129.4	82	124	758.8	1	2589	2007-2008	0.557393701
43718	2	2	1	61	4	6009.670477	7421.138149	45.66	147.2	143.2	80	144	980.4	1	2443	2007-2008	1.84124771
43720	4	4	1	64	4	7750.960967	7944.069793	41.02	136.9	134.1	72	126	648.9	1	1751	2007-2008	2.724667031
43723	2	5	2	51	3	89748.14518	90689.35381	25.94	88.5	60.1	72	126	660.7	1	1845	2007-2008	-0.904162261
43726	4	1	2	76	4	15412.60203	16215.91849	30.46	109.6	86.8	68	176	1448	1	577	2007-2008	0.878405998
43727	1	1	2	46	2	19909.18684	20563.97936	33.1	108	78.5	86	110	710.3	2	2121	2007-2008	1.326993481
43736	4	5	2	49	1	22291.90488	22029.48561	29.15	95.4	67	94	180	727.3	2	1149	2007-2008	3.164882672
43749	3	2	1	63	2	7297.431562	7555.394541	21.04	84.1	63.4	62	118	926.6	1	1068	2007-2008	3.938349487
43756	1	1	1	64	1	5534.662799	6545.067282	29.69	114.7	86.3	78	136	770.5	1	1521	2007-2008	0.038703792
43757	1	1	2	62	1	6890.455959	6806.706603	29.92	100.7	69.5	72	136	863.6	2	938	2007-2008	3.694584171
43759	4	5	1	42	4	22437.25051	22636.84883	24.85	88.7	82.5	86	116	686.8	2	2840	2007-2008	2.333130581
43761	2	1	1	60	4	7540.28696	8475.052838	27.02	101.2	83.7	90	150	741.9	1	1099	2007-2008	3.844529964
43767	4	4	2	67	3	24774.24183	25061.99131	21.02	78.7	56.6	66	122	1299.4	1	1248	2007-2008	0.241418597
43768	3	3	2	58	3	30297.63486	30201.40519	26.94	98.1	68.1	72	146	631.4	1	1302	2007-2008	2.820036491
43770	5	5	2	43	3	80250.36656	82537.63509	25.19	85.9	67.5	72	104	658.9	1	2905	2007-2008	-3.355199899
43771	3	1	2	68	1	7812.278838	9667.396322	26.8	91.4	63.3	72	124	502	1	2245	2007-2008	-0.193440326
43772	3	3	2	58	3	29941.78607	30103.00281	29.02	98.5	79.5	76	126	736	1	2974	2007-2008	-0.386195231
43775	4	3	2	50	1	15037.99404	16309.94409	35.58	125.6	99.1	90	122	1093.8	1	1844	2007-2008	0.109755373
43776	4	4	1	48	1	28374.25929	31153.79672	41.63	125.8	123.6	70	138	735.4	2	2433	2007-2008	-0.278443854
43785	5	5	1	48	3	92595.75935	96222.36399	34.6	120.6	111.6	78	120	695.2	2	2171	2007-2008	2.387704004
43786	5	5	1	71	1	8741.366438	9173.757184	23.73	90.4	66.5	84	124	684.3	2	1747	2007-2008	0.459103458
43792	5	5	1	75	3	30052.77379	29781.65506	30.33	119.5	97.3	44	134	421.7	1	2574	2007-2008	-2.017568911
43794	5	5	2	70	2	8769.324154	9341.174266	44.11	132.4	130.5	50	110	954.5	1	911	2007-2008	3.316881303
43801	4	4	1	72	3	30137.04798	29588.7608	29.81	106.9	88.2	62	140	1112.6	1	2396	2007-2008	-2.070975303
43802	3	3	1	64	4	7237.067591	7008.320186	22.96	92.7	81.5	80	120	585.8	1	1641	2007-2008	1.950609795
43813	5	5	1	73	3	36500.574	36926.87946	27.56	105.8	84.9	94	122	635.6	1	2912	2007-2008	-1.537158145
43816	4	4	2	77	3	21912.18839	27161.07017	36	130.1	94	50	116	787.1	1	2240	2007-2008	-1.268211775
43822	5	5	2	49	3	79814.77417	79243.98122	31.01	108.9	77.7	60	90	862.3	1	1133	2007-2008	1.512639425
43824	3	3	2	79	3	43220.63153	42695.03027	26.08	89.9	72.4	74	126	539.8	1	951	2007-2008	3.099907637
43825	2	2	1	49	4	24472.84204	24690.54867	28.87	101.3	88	82	152	1330.2	1	1321	2007-2008	3.180159877
43826	4	4	1	60	3	40868.48014	39984.44685	26.87	100.8	88.8	76	116	659.1	1	1456	2007-2008	2.247943091
43827	4	4	1	60	3	59034.20809	60416.39221	29	108	87.4	82	142	1272.6	1	3181	2007-2008	2.004486388
43830	4	4	2	44	1	23849.4058	23568.65171	34.2	100.7	90.2	72	106	1141.4	1	1575	2007-2008	0.496281394
43833	5	5	1	77	3	41383.71445	42501.4725	36.37	126.3	109.1	84	144	734.4	1	1251	2007-2008	3.047191473
43836	5	5	1	52	4	23942.48032	25832.30144	24.22	94.2	82.9	96	138	692.9	1	3419	2007-2008	-1.472948293
43841	5	5	2	74	3	37167.13286	36128.64169	28.8	100.7	NA	66	160	838.6	1	1431	2007-2008	-0.604835079
43843	4	4	2	61	3	59356.35643	70522.67704	30.69	109.2	85.9	92	154	572.6	1	2921	2007-2008	-0.902132883
43847	2	2	2	65	1	7480.950035	7921.354103	33.47	104	74.9	52	140	872.4	1	1824	2007-2008	-0.75227178
43848	3	3	1	44	1	17436.99873	17910.3471	26.36	91.2	69.6	84	136	1111.8	2	1395	2007-2008	2.955478527
43852	2	3	2	52	4	20683.75597	21104.33645	50.47	127.2	144.5	108	180	953.4	1	944	2007-2008	3.064573754
43853	1	4	1	77	2	11715.38857	13642.04274	29.09	108.2	82.5	54	142	704.3	1	1772	2007-2008	0.665825026
43857	1	1	2	48	1	16631.04585	16879.22068	33.11	104.6	69.9	86	130	501.8	2	929	2007-2008	2.810929751
43859	2	2	1	79	3	8872.862854	8711.437723	33.46	127.5	103.4	60	118	765.7	1	2267	2007-2008	0.274519692
43862	3	3	1	53	4	19030.03667	18743.60437	30.45	104.8	92.6	74	118	1236.5	2	1486	2007-2008	3.376861608
43864	3	3	2	65	3	22473.38602	23114.10269	23.18	90.6	65.2	68	104	672.3	1	1755	2007-2008	0.225623411
43867	3	3	1	63	3	16338.94193	20384.26634	27.14	98.2	74.6	76	132	640.7	2	1880	2007-2008	3.334492681
43871	5	2	2	58	4	22428.7243	22837.22915	31.43	107.1	95.8	50	136	1131	1	1563	2007-2008	2.578649015
43881	5	5	1	64	3	60877.65911	63037.17536	30.34	114.2	99.5	62	118	701.9	1	2875	2007-2008	2.188312989
43882	3	3	2	50	4	21262.5998	21173.78091	28.86	94.7	71.6	80	146	1060	1	2523	2007-2008	0.788967166
43893	4	4	2	45	4	24223.25804	24122.07178	39.41	121.7	118.1	72	126	378.7	1	1844	2007-2008	0.780284922
43895	4	4	2	50	3	108024.6255	112349.119	36.39	114.5	92.7	70	114	713.1	1	1091	2007-2008	1.780014468
43896	4	4	2	48	3	34403.62375	36214.83397	30.51	107	85.8	64	114	1054.7	1	2417	2007-2008	2.326697345
43902	5	2	2	41	3	65721.67813	65251.67153	19.58	71.5	49	74	132	801.3	2	2784	2007-2008	1.042077347
43904	2	2	1	70	3	10621.8451	12248.20325	25.44	98.7	71.2	56	126	1191.1	1	1293	2007-2008	1.703935538
43905	5	4	2	73	3	32569.84379	31659.806	34.2	100.7	99.2	64	164	825.9	2	1496	2007-2008	1.306175505
43906	2	4	1	68	4	6302.970309	6660.027226	43.69	136.2	130.3	74	122	695.4	1	1731	2007-2008	1.280103518
43910	1	1	1	53	1	15232.987	15708.13637	28.2	98.3	73	74	122	997.3	2	3354	2007-2008	-0.835694233
43911	4	4	1	60	3	21262.07406	20802.15039	28.58	116.5	95.1	68	112	793.6	1	2788	2007-2008	-0.197650955
43914	4	3	2	54	2	11540.51984	11404.66537	33.47	112.1	86.1	84	134	502.2	1	1416	2007-2008	1.007194844
43916	2	3	2	55	3	31250.8543	31151.59708	24.31	89.4	62.4	62	110	724.3	1	1014	2007-2008	2.718788766
43920	5	5	2	43	4	25458.24827	25351.90316	27.12	82.2	71.7	80	120	1337	1	1856	2007-2008	1.754191651
43923	1	1	1	67	1	8842.521562	9790.185755	28.61	100.5	73.6	80	136	868.3	1	3570	2007-2008	-1.400870875
43937	1	1	2	47	3	29253.34768	30886.47423	24.9	91.6	57.3	80	136	684.2	1	2167	2007-2008	2.131655572
43942	4	4	1	62	3	55531.60863	54330.39462	31.22	111.7	92.9	72	140	1035.3	1	2896	2007-2008	0.845688903
43945	3	3	1	70	3	9935.266183	10074.15007	31.12	111.5	89.5	62	146	631.1	1	1799	2007-2008	2.064532395
43949	3	3	1	41	2	17743.78766	18373.5773	40.72	122.9	118.1	62	110	698.1	2	1963	2007-2008	0.855751685
43957	5	5	1	44	2	20643.62113	22712.4136	28.83	98	87.1	68	114	728.6	2	1723	2007-2008	-1.232346061
43959	3	3	2	57	3	120732.4204	120348.9568	24.18	81.4	57.5	64	112	1308.5	1	1538	2007-2008	-0.722556365
43960	3	5	1	43	1	26084.33129	28639.54778	33.66	121.4	99.8	64	126	621.5	2	4366	2007-2008	-1.344614836
43962	3	3	1	74	3	28153.11442	27640.9212	27.59	96	78.6	62	120	732.1	1	1436	2007-2008	2.122062819
43966	3	5	2	71	3	31860.18762	30969.97841	19.53	71.5	49.8	70	170	1440.2	2	2290	2007-2008	-0.613575451
43968	4	2	1	52	3	19915.04635	22182.13546	25.03	91.9	75	94	124	592.9	1	1757	2007-2008	3.905400351
43971	4	4	2	52	5	152084.3589	158172.6727	24.92	92.5	66.2	70	116	833.4	2	1731	2007-2008	0.011413017
43973	2	2	1	44	1	24613.89336	25381.65321	32.92	111.5	99.2	88	136	759.7	2	3595	2007-2008	-2.557328531
43976	2	2	2	60	1	8975.577102	8866.48435	33.61	108	79.1	50	154	1277.9	2	1838	2007-2008	2.251556809
43977	2	2	2	62	3	24080.99578	26827.57151	26.06	81	59.1	92	156	1059.5	1	2678	2007-2008	1.136160088
43980	2	2	1	53	1	15232.987	15708.13637	26.57	99.3	82.5	72	110	1129.8	2	3348	2007-2008	0.056642949
43991	1	1	2	61	2	8735.03942	9563.868368	41.43	114.6	105.8	66	112	744.1	1	1238	2007-2008	0.601687239
43994	3	3	1	46	3	109838.1296	109817.2392	24.67	96.7	82.9	84	138	1084	1	2209	2007-2008	-2.331304501
43997	5	3	1	60	2	5811.14324	5920.812325	31.09	113.2	90.7	90	128	627.9	1	1541	2007-2008	2.251724794
44010	1	2	2	72	1	8773.912241	9232.889176	33.93	112	84.8	62	176	911.2	1	2527	2007-2008	-0.062285046
44012	3	5	2	48	3	24175.26429	24637.75464	35.13	112.1	100.7	74	114	1315	1	2286	2007-2008	3.102665398
44013	3	3	2	51	3	92580.28388	96661.92069	25.57	95	73.8	70	122	580.6	1	1430	2007-2008	2.273334749
44016	3	4	1	44	3	27597.241	28753.02852	29.8	107	91.9	76	138	881.7	1	1223	2007-2008	3.292584521
44017	3	3	1	42	3	116710.0803	120766.6669	25.61	89	80.5	64	112	1313	2	4068	2007-2008	-1.621262596
44021	3	3	2	71	3	32611.65412	31835.08046	24.76	93.1	66.5	50	96	817	1	1695	2007-2008	-2.999035888
44022	5	4	2	44	4	24997.06453	25439.54491	27.3	95.4	73.7	72	130	1053.1	1	2543	2007-2008	1.539031465
44027	1	1	1	76	3	31035.46855	30785.72193	26.28	100.3	71.2	74	142	684.2	1	1666	2007-2008	2.771097901
44032	4	4	2	47	4	23833.86139	24647.07059	38.43	113.9	109.9	78	116	719.1	2	1255	2007-2008	1.694335741
44033	5	4	2	47	3	52317.21344	53808.34078	23.49	89.5	68.3	72	116	774.2	2	1969	2007-2008	1.484240726
44034	5	5	2	49	3	68474.4622	68461.61533	19.64	71.4	55.1	72	108	842.2	2	1888	2007-2008	0.737144341
44039	1	1	2	57	2	10478.1382	10500.2965	52.59	123.6	111.8	64	90	768.6	1	954	2007-2008	2.794307907
44041	5	5	1	60	4	7322.988469	7307.292697	30.79	106.2	96.9	80	106	701.8	1	1689	2007-2008	-0.077839517
44042	1	1	1	52	1	10271.09485	10866.87242	26.53	99.8	73.2	52	116	636.7	1	1511	2007-2008	3.15279402
44045	2	2	1	65	3	49593.47222	48520.70708	23.49	89.4	74	60	110	534.4	2	1783	2007-2008	1.421890306
44059	4	4	2	52	3	92231.45584	91938.51542	26.83	89.6	69.2	80	122	1506.9	1	1938	2007-2008	0.260680431
44060	5	5	2	69	3	69611.6442	72562.78473	25.3	88.3	66	54	114	509.5	1	1141	2007-2008	2.326467364
44062	1	1	1	77	1	6077.295347	6792.125835	31.56	120.4	81	54	124	500	1	2673	2007-2008	1.183509828
44063	3	3	2	40	3	26186.97577	26222.97959	32.59	100.7	92.2	60	104	822.3	1	1028	2007-2008	1.795407833
44066	1	1	2	55	1	16965.19077	16765.47734	35.53	100.6	83.4	74	120	842.2	1	800	2007-2008	1.72538728
44068	3	5	2	60	1	6653.459034	6484.123447	31.47	98.5	76.3	88	144	666.5	1	2027	2007-2008	0.399247343
44069	3	5	2	76	4	12905.14194	14315.07808	32.29	95.8	80.6	58	106	1063	2	539	2007-2008	3.282303203
44071	5	3	2	43	3	95285.34991	98001.14039	33.87	106.4	104.8	84	114	594.6	1	1192	2007-2008	2.579610918
44072	5	3	2	54	4	21630.05297	22368.06842	22.25	81.5	56.1	76	152	1244.3	1	893	2007-2008	1.997321867
44085	3	3	1	79	3	30052.77379	29506.01983	19.73	81.7	54.1	62	136	1508.8	1	1935	2007-2008	1.21929372
44086	3	3	1	50	4	26077.33235	28135.66101	34.42	106.7	108.7	86	126	197.5	2	4807	2007-2008	0.475444384
44089	1	1	2	44	5	27554.00914	27356.95748	20.12	80.6	53.2	72	96	1000.2	1	1317	2007-2008	1.881821482
44091	1	1	2	49	2	15609.97942	15426.21947	29.89	93	73.4	84	128	1361.3	2	1324	2007-2008	1.80877048
44092	2	4	1	47	3	27597.241	28753.02852	24.41	92.1	71.3	70	134	579.7	1	7774	2007-2008	-1.676509002
44096	1	1	1	64	2	6909.238913	7649.710766	24.96	95.3	68.7	62	132	723.2	1	654	2007-2008	3.852722731
44097	5	5	1	70	3	30137.04798	29588.7608	28.8	101.5	77.6	62	136	871.3	1	1814	2007-2008	0.732252561
44109	2	2	1	42	4	25280.86633	25460.22417	27.78	95.1	77	76	118	573.6	2	3493	2007-2008	1.31830189
44113	5	5	1	45	2	15096.78331	15369.66284	25.28	84.2	62.8	62	110	731.1	1	1838	2007-2008	0.336211988
44117	2	2	2	67	4	10882.70737	10520.56526	24.19	93.6	69.1	88	146	1173.5	1	1674	2007-2008	3.344095121
44120	5	5	2	71	2	8499.583422	11204.29912	35.59	116.9	83.1	68	152	619.5	1	1278	2007-2008	1.158353665
44126	5	5	1	60	3	49330.97891	50485.97866	31.87	123.9	113	86	114	925.7	2	3037	2007-2008	-2.367367939
44129	4	1	2	51	2	8957.267313	8851.822779	26.19	95.5	70.1	88	142	1333	1	2028	2007-2008	1.307132101
44132	2	NA	2	57	4	22428.7243	22837.22915	28.8	100.7	NA	72	126	823	1	573	2007-2008	3.227725266
44133	4	4	2	47	3	84798.42535	84191.99197	23.44	86	65.6	80	118	929.7	2	2468	2007-2008	-0.212992869
44141	1	1	2	77	1	6804.830514	7644.180018	25.1	89.1	50.9	92	178	890.9	1	966	2007-2008	2.242769776
44150	2	3	1	48	3	36767.07195	37469.38141	26.72	90.7	78.6	72	126	727.7	2	1934	2007-2008	2.066986535
44155	3	1	2	71	4	14035.48737	14011.91331	32.59	101.3	77.6	60	136	1188.6	1	1793	2007-2008	-1.718274339
44156	1	1	1	49	1	21419.98208	22662.4538	27.02	103	77	74	144	685.5	2	2750	2007-2008	-0.515821151
44158	4	4	2	76	1	10626.05894	11149.23173	29.91	102.9	63.4	70	142	763.7	1	1897	2007-2008	1.924392347
44162	4	4	2	72	3	41386.68367	41454.34414	25.45	91.1	66.8	56	114	696.9	1	1301	2007-2008	-1.029669411
44163	1	1	2	45	3	31640.24104	32245.54182	21.02	80.6	52.4	72	124	397.8	2	3095	2007-2008	1.31839619
44165	5	3	2	49	1	22291.90488	22624.55323	33.77	107.6	93.5	74	132	905	1	1230	2007-2008	0.943510057
44176	1	1	1	73	3	11108.0172	11851.07376	35.67	120.3	99	88	160	854.5	1	689	2007-2008	3.032069331
44180	4	4	1	45	2	16110.35395	16150.17014	35.53	119.7	110.8	80	110	1041	2	1555	2007-2008	2.848475944
44182	2	2	1	59	2	14772.34746	14808.85681	36.89	113.2	97.4	70	114	835.9	2	813	2007-2008	2.918084495
44184	2	2	1	49	3	103822.0152	113908.665	66.16	152.8	218.2	82	140	824.3	1	4553	2007-2008	-0.86134484
44186	4	4	1	58	1	14238.1869	15632.95718	30.38	104.3	83.4	78	114	532.2	1	3082	2007-2008	0.518932279
44187	2	2	1	46	3	27710.92245	28240.24508	33.02	106.9	95.2	76	120	1047.7	2	4168	2007-2008	2.197919745
44189	3	3	2	55	3	93245.88099	96287.53715	23.49	97.4	65.2	84	130	458.2	1	1371	2007-2008	1.877316001
44190	2	2	2	71	4	11531.03713	12507.69265	21.89	90	56.4	62	132	976.1	1	379	2007-2008	3.971271186
44195	1	2	1	69	2	4510.010941	5118.859584	38.94	125.7	101.7	28	118	749.5	1	2163	2007-2008	-0.477913205
44196	1	1	1	40	1	16110.35395	16150.17014	34.05	109	86.2	86	150	791.3	2	1920	2007-2008	1.088436498
44201	4	4	1	76	3	11265.8589	11615.56335	21.02	98.9	71.7	98	186	395.3	1	1815	2007-2008	0.136562915
44206	1	1	1	45	1	28374.25929	30429.89321	27.38	91.5	69.3	76	132	441.1	2	1123	2007-2008	1.49702447
44209	4	4	1	59	5	28007.97442	29298.47994	31.11	113.7	95.7	88	138	1172.6	1	4495	2007-2008	-2.624585114
44210	5	5	1	71	3	9471.568094	9299.250643	28.9	112	95.4	80	156	836.8	1	1010	2007-2008	1.857550363
44213	5	5	2	50	3	76996.47137	77290.25857	22.59	85.5	56.9	76	106	782.3	1	1096	2007-2008	1.857224639
44215	4	2	1	73	3	9507.573661	9334.601155	27.3	98.4	72.9	28	140	1079.2	1	1356	2007-2008	0.695807023
44217	4	5	2	53	4	21630.05297	22368.06842	24.11	84.5	62.8	62	110	1051.3	1	2013	2007-2008	-0.461666072
44218	3	3	1	64	2	6779.731732	7019.818249	34.89	112.6	97.9	76	122	905.3	1	2854	2007-2008	0.487103989
44223	1	1	1	57	1	9594.950745	10053.35992	35.33	119.6	97.7	80	150	528.4	1	1993	2007-2008	2.226315923
44228	3	3	1	54	3	32678.04982	32737.79935	22.64	85.6	63.9	96	148	1028.8	1	2428	2007-2008	0.857618182
44229	3	3	2	72	3	31860.18762	30969.97841	25.04	104.8	68.1	78	174	455.8	1	2084	2007-2008	2.322470897
44233	2	2	1	65	1	5820.827316	6026.956735	27.46	100.9	78.8	70	120	714.3	2	1762	2007-2008	1.483788385
44238	5	5	1	61	3	38694.44899	39600.41275	30.08	106.6	89.6	78	114	1021	2	2373	2007-2008	-1.051406349
44240	4	4	1	72	3	30052.77379	29506.01983	38.78	141	127.9	62	120	613.4	1	2408	2007-2008	-0.811956357
44241	4	4	1	46	3	90414.49484	90397.29865	22.73	90.1	79.4	82	120	477.7	1	3159	2007-2008	-1.181408902
44243	5	5	1	60	1	7258.809714	7395.799457	33.8	115.6	124.2	78	122	580.7	1	4283	2007-2008	-1.367630238
44245	4	4	2	40	3	97373.94673	99236.781	23.25	100.7	70.4	66	92	667.7	2	666	2007-2008	3.550467099
44249	1	NA	1	57	2	10271.09485	10866.87242	28.73	103.5	83.8	94	192	883.2	1	1350	2007-2008	1.497342503
44252	1	4	2	58	2	10478.1382	10500.2965	27.78	89.5	62.5	64	118	914.1	1	1732	2007-2008	0.326268067
44255	5	5	2	60	3	59522.80391	61219.80021	30.94	94.8	79.8	78	140	519.5	1	1527	2007-2008	2.218670522
44259	3	3	1	62	3	64542.96613	65216.03135	25.08	98.2	81	80	102	816.1	1	2232	2007-2008	1.173253799
44260	4	4	2	77	2	5957.076377	7701.564415	31.84	106.5	77	72	126	1034.8	1	1046	2007-2008	2.163198576
44261	3	3	1	45	3	76612.76648	76598.19528	39.99	129.9	134.2	76	116	1343.9	1	2757	2007-2008	-0.073159256
44265	3	NA	1	40	3	107335.6429	119313.6231	28.28	100	90.5	100	132	850.7	2	3672	2007-2008	-1.197991559
44268	1	1	1	79	1	8378.923626	9484.472684	28.8	100.7	93.6	78	152	622.5	1	1554	2007-2008	1.689778392
44269	2	3	2	40	3	30055.17538	29840.2367	23.4	79	59	70	116	972.2	2	1072	2007-2008	2.656759385
44275	4	4	1	62	4	9869.265606	9557.32035	21.99	89.6	69.9	68	144	760.8	1	662	2007-2008	4.181724161
44276	2	2	1	76	3	9935.266183	10270.28658	39.19	132	120.7	72	128	750.7	1	1230	2007-2008	2.74424187
44281	1	4	2	74	1	8213.174636	9854.459177	25.06	100.7	56	72	154	585.2	1	1163	2007-2008	0.157495499
44285	3	2	1	55	4	20000.25749	19889.42144	30.95	104.4	88.7	84	134	646.1	1	1572	2007-2008	-2.571809078
44286	1	1	1	46	1	19124.67725	20234.00921	30.01	104	82.4	84	136	623.3	2	1279	2007-2008	2.56141841
44287	4	4	2	51	1	9900.809686	9784.257815	33.77	97.2	93.4	76	142	409.9	1	2292	2007-2008	-0.697411778
44288	2	2	1	51	4	20422.84537	21503.09482	24.24	103.9	85.4	72	126	936.9	1	2995	2007-2008	1.465014038
44290	1	3	1	71	4	12084.86642	14119.21374	28.8	100.7	NA	52	102	783.3	1	1366	2007-2008	1.304927563
44295	1	1	2	65	3	62262.25635	62985.42406	28.19	100.7	77.6	76	146	1121.4	1	1442	2007-2008	3.599130701
44296	3	4	2	73	3	53082.49251	51818.45159	33.43	110.2	82.2	62	136	836.4	1	1454	2007-2008	-2.268515268
44299	3	3	1	67	1	6543.699957	6695.509692	25.01	92.7	75.8	74	140	664.8	2	1719	2007-2008	1.761746215
44305	4	4	1	53	3	86053.45943	86210.80218	26.36	101.5	78.7	64	130	404.4	1	2544	2007-2008	2.514291659
44307	3	3	2	57	2	11904.69842	11764.55687	29.96	86.6	67.5	84	134	845.5	1	1173	2007-2008	-0.616835471
44313	3	4	1	62	5	83112.34265	82629.5774	23.5	97.6	67.2	72	142	631	1	1140	2007-2008	2.551400033
44316	3	3	1	66	2	5811.14324	6074.681948	34.06	115	93.4	74	146	799	1	2155	2007-2008	1.315523995
44317	4	4	1	45	4	37233.73436	38015.2972	30.66	107.3	108.7	74	126	899.2	1	2739	2007-2008	3.14597086
44320	4	4	1	48	3	101958.5018	101939.11	28.58	105.2	102.2	78	124	837.4	2	4561	2007-2008	-2.329707577
44326	2	3	2	40	3	26186.97577	26222.97959	30.28	99.2	78.1	80	134	836.6	1	1741	2007-2008	3.775157849
44329	5	5	1	66	2	10865.54476	11716.75678	22.24	100.7	62.7	80	114	763.7	1	3141	2007-2008	1.007016218
44331	4	4	1	41	5	21722.71953	22207.91046	26.22	89.1	68.3	80	132	1484.4	1	1733	2007-2008	0.377574875
44332	5	5	2	78	3	31860.18762	31487.21337	38.76	112.9	91.2	74	126	911.7	1	1953	2007-2008	-0.621653406
44333	5	NA	2	78	3	27789.5029	27013.03317	18.87	71	44.3	56	154	346.7	1	914	2007-2008	2.398544688
44336	1	1	2	44	3	26652.2502	27716.30732	30.02	97.5	71	86	156	755.4	1	4215	2007-2008	2.261735521
44343	3	3	1	68	3	18456.99169	23026.7196	30.63	100.7	84.3	82	150	667.7	1	1627	2007-2008	1.626951702
44345	3	3	2	74	3	35990.28753	41088.87431	20.08	72	53.8	66	138	876.4	1	3020	2007-2008	-1.826647677
44346	3	3	2	46	3	24175.26429	24002.37561	24.52	85.3	69.3	64	114	762.9	2	1430	2007-2008	1.502870983
44354	4	4	2	46	3	21341.16365	22532.57674	35.6	110	100	70	134	687.8	1	2041	2007-2008	2.22657817
44356	1	4	2	60	2	8359.699946	8481.029939	19.27	73.1	48.1	60	110	1045.6	2	2011	2007-2008	-3.330162172
44360	2	2	1	46	1	15503.79413	16244.50471	34.69	108.2	99.3	76	122	687.6	2	3084	2007-2008	0.836036969
44361	5	5	2	75	3	33715.31325	32773.26977	29.44	105.8	76.7	68	136	734.5	1	1553	2007-2008	1.550805875
44365	5	5	1	60	3	49330.97891	49732.37341	34.44	119	112.7	72	132	1074.9	1	4224	2007-2008	-2.516624607
44366	4	4	1	67	3	49330.97891	48263.89181	31.43	112.4	97.7	68	130	531.2	1	2578	2007-2008	1.260073858
44369	4	4	2	56	3	92231.45584	91938.51542	33.49	108.1	83.4	74	134	659.4	1	1801	2007-2008	1.677197871
44372	4	4	1	44	1	18303.71976	18839.4527	31.79	104.8	92.1	72	140	817.5	2	1351	2007-2008	3.514171796
44379	4	2	1	53	3	83459.20123	83611.80056	34.69	123.4	113.9	82	156	651.6	1	2487	2007-2008	1.080480519
44380	1	1	1	54	2	11086.85851	11432.68127	29.83	100.6	81.3	80	136	678.7	2	2503	2007-2008	0.375424104
44381	3	3	1	75	3	28468.94398	28404.7564	28.93	102.8	80.2	74	124	843.3	1	1073	2007-2008	2.295916523
44385	1	4	1	78	2	11092.1792	12916.34348	34.64	117.6	96.5	90	210	714.9	1	1075	2007-2008	1.856021609
44400	5	5	1	60	3	64448.29287	63054.20049	24.1	88.8	70.3	52	106	541	1	1231	2007-2008	2.534989393
44404	4	2	1	50	3	89486.19318	89649.81245	20.19	80	60.3	88	120	1136.6	2	2206	2007-2008	0.520528423
44405	1	1	2	64	1	7812.278838	8799.220618	32.04	114	80.6	52	114	962	2	1580	2007-2008	2.165890107
44407	5	5	2	41	3	81167.56695	80587.09955	22.73	72	54.9	46	92	791.1	1	3626	2007-2008	-0.055353265
44410	2	2	2	65	4	9816.366486	9643.180374	21.44	87.2	51.3	72	126	1124.2	1	1928	2007-2008	1.402583837
44411	2	2	1	50	4	20422.84537	21503.09482	45.81	140.5	155.6	72	126	692.7	2	2095	2007-2008	1.74538182
44413	1	1	1	53	1	10791.36775	11084.31245	32.97	111.2	86	60	120	1250.9	2	1763	2007-2008	0.204254089
44415	5	5	2	48	3	88636.92626	88003.04195	20.74	74	55.5	72	106	1148.4	2	2483	2007-2008	0.850301608
44418	5	5	1	43	3	63609.53168	66471.58772	27.36	98.9	85.9	100	140	919.6	1	2804	2007-2008	0.198045289
44424	3	3	2	62	4	12310.32993	12093.14385	37.38	105.6	105	76	154	1316.7	1	2000	2007-2008	-0.601257403
44430	3	3	1	45	4	24916.54505	25203.28976	31.4	100	94.4	60	122	700.7	1	1887	2007-2008	3.703075905
44431	1	2	2	47	2	17053.61437	17303.36296	39.62	106.4	100.8	76	114	276.6	1	1775	2007-2008	2.050272525
44433	3	3	1	66	3	46864.6789	47353.39188	29.39	115.9	92.6	64	114	1131.1	1	2125	2007-2008	0.415624526
44442	3	3	2	45	4	30227.87557	32769.21252	23.02	73.2	57.9	70	110	1557.1	2	972	2007-2008	3.457361179
44444	4	4	1	58	5	16976.74238	17390.97059	22.14	78.2	58.6	86	150	615.3	2	1959	2007-2008	-1.928281233
44446	4	4	1	48	4	22437.25051	22585.06772	28.63	99	81.3	72	134	643.2	2	1300	2007-2008	1.857706308
44450	1	1	2	62	2	5992.011661	5814.814791	23.32	75.9	58	64	112	431.7	1	927	2007-2008	3.449408944
44453	2	2	2	42	5	26186.97577	26222.97959	21.2	70.2	56.4	72	126	920.2	2	1370	2007-2008	3.082389112
44456	5	5	1	43	3	107335.6429	119313.6231	29.65	103.4	99.2	86	132	1381.7	1	3868	2007-2008	-1.549230404
44457	5	5	1	61	3	52939.84105	52278.53845	31.28	110.3	90.2	68	116	1067.5	1	1453	2007-2008	1.886880309
44460	4	4	2	75	1	7024.353292	7595.795962	37.07	122.7	85.2	76	158	770.2	1	520	2007-2008	3.807817056
44462	5	5	1	75	3	18250.287	18964.08796	33.2	116.1	105.2	84	134	628.8	1	1487	2007-2008	0.476298614
44465	5	5	2	63	2	8975.577102	8840.561234	38.45	125	104.8	72	124	1108	1	2026	2007-2008	2.462789306
44474	4	4	2	73	2	11483.63877	12049.0344	26.46	98.3	65.9	0	128	1061.7	1	1717	2007-2008	0.523401336
44475	1	1	1	44	1	20950.84125	22468.66976	26.46	92.9	66.8	66	112	1284.6	2	2183	2007-2008	0.554206264
44479	2	2	2	65	1	6106.112569	6600.9121	37.85	117.5	82.9	52	100	360.4	1	1280	2007-2008	2.541744431
44480	4	4	1	50	3	22515.39801	24752.7181	29.32	112	93	86	140	819	1	5314	2007-2008	-1.336605216
44481	1	NA	2	51	2	10794.21398	10667.145	25.61	99.8	64.5	54	114	969.1	2	1820	2007-2008	-3.514051975
44487	5	5	1	62	3	62086.51611	60743.51173	31.37	112.5	103.8	74	132	730.1	1	2829	2007-2008	-0.512544078
44492	2	2	2	68	3	75872.6614	80240.78904	32.3	112.3	82.7	70	132	892.6	1	1753	2007-2008	2.36996355
44498	3	3	2	69	4	12310.32993	12093.14385	34.31	99.2	89.7	78	116	1107.3	1	920	2007-2008	2.639200087
44514	5	5	2	58	3	76996.47137	81374.54201	24.44	96.4	64.7	74	134	936.5	1	1672	2007-2008	-2.101603922
44517	5	3	1	61	3	52300.68171	51169.35644	32.31	118.3	100.2	66	94	544.2	1	2503	2007-2008	1.132589857
44522	3	3	2	72	4	22897.55103	24836.92728	34.85	118.5	86	62	120	387.8	1	1280	2007-2008	2.93752726
44527	2	2	2	41	3	31767.81236	31540.62581	46.25	125	134.6	108	154	1160.6	1	1102	2007-2008	4.023776789
44528	1	1	1	61	1	5845.346404	6755.422912	34.93	100.7	94.4	78	144	684.3	2	2728	2007-2008	1.390569309
44532	5	5	1	63	3	58553.01978	59923.9377	26.25	97.5	91.8	54	106	629.5	1	1977	2007-2008	-0.896686111
44533	4	4	2	41	4	30227.87557	30101.6066	27.76	94.9	76.4	94	142	776.3	1	2431	2007-2008	0.610455485
44545	5	5	2	54	3	76980.58635	77274.31294	34.07	109.8	88.1	90	140	738.1	1	1773	2007-2008	-0.378531467
44550	4	4	2	66	2	8367.559715	8367.175996	29.71	105.2	77.4	56	136	1064.7	2	1153	2007-2008	2.288474091
44556	1	1	1	64	1	7130.271363	7395.228652	30.52	104	84.8	58	96	645	1	935	2007-2008	3.268513425
44559	2	2	2	45	2	17358.05246	17153.71428	30.56	94.2	73.8	66	104	652.2	2	1366	2007-2008	1.664113901
44564	4	4	2	40	3	97373.94673	99236.781	36.22	106	89.5	66	110	822.1	2	1274	2007-2008	3.050701287
44569	3	4	1	66	3	17290.31078	17432.66094	26.49	102.1	77.1	76	168	667.6	1	1882	2007-2008	-1.257677319
44572	2	2	2	60	4	13366.22661	13131.20517	27.14	94	71.4	80	138	1506.9	1	1012	2007-2008	1.748038418
44575	3	3	2	40	1	22829.30217	23580.13425	25.71	93.6	68.4	58	114	1058.7	2	2691	2007-2008	0.372506643
44576	2	3	2	45	1	23849.4058	23568.65171	31.66	104.8	88.3	84	120	865.8	2	2198	2007-2008	2.300487852
44578	3	3	1	53	3	28740.13582	28792.68515	26.13	101.6	82.8	64	120	935.7	1	3459	2007-2008	0.129510088
44579	3	3	1	59	4	25798.10223	25819.82281	26.09	104.2	93.2	94	158	643.6	1	1846	2007-2008	1.27141964
44587	1	1	2	75	4	11869.63537	13312.88729	25.65	96	71.2	70	132	776.8	1	1600	2007-2008	3.964088766
44588	4	4	1	53	3	76861.66606	77918.37301	38.25	122.1	108.6	90	144	699.9	1	2552	2007-2008	0.814714759
44595	5	5	2	40	2	17358.05246	17153.71428	36.47	100.5	92.2	84	128	951.2	1	3546	2007-2008	-1.698679315
44600	5	5	1	62	4	7543.241935	7641.133439	22.75	94.7	77.7	66	116	523.9	2	934	2007-2008	3.187161985
44601	2	2	2	60	4	9560.867353	9662.601889	36.61	119.1	99.2	58	122	1433.8	2	1315	2007-2008	1.714962553
44603	2	2	2	52	4	25246.16833	27368.68005	30.93	112.5	89.5	88	152	522.7	2	1741	2007-2008	2.391128484
44614	2	2	2	62	4	10426.65276	10079.68672	26.01	101.6	83.7	90	158	1084.6	2	858	2007-2008	2.994128639
44617	5	4	2	53	4	34191.53044	37066.10227	33.6	108	88.4	72	102	1106.7	1	3666	2007-2008	-0.718204332
44621	5	5	2	55	4	19110.09084	19726.63967	29.51	103.8	78.6	72	118	953.7	1	1725	2007-2008	0.359514819
44624	2	2	1	52	3	25211.30734	27716.51575	20.37	90.4	64.1	88	158	1113.6	1	1167	2007-2008	3.578862846
44627	5	5	1	60	3	53088.2953	51939.93303	29.94	109.1	89.2	72	116	950	1	1671	2007-2008	1.059420528
44634	1	2	1	74	4	10235.68877	10303.44593	23.02	102	65.5	58	128	481.6	1	1356	2007-2008	2.976210826
44636	5	5	1	48	4	23313.99962	22963.08686	21.81	77	62	78	114	1059.9	2	1638	2007-2008	-0.230680637
44637	2	3	1	63	4	6852.086052	6635.507046	22.99	80	64.8	78	110	963.9	1	1604	2007-2008	2.197147425
44643	5	5	2	56	3	92231.45584	91938.51542	21.04	83.7	57.2	74	148	836.3	1	1197	2007-2008	2.83503112
44644	3	3	2	42	3	90028.19905	95054.20305	27.46	90	75.4	84	118	1517.7	1	1474	2007-2008	2.18181811
44647	3	3	1	42	4	26885.34747	29007.45415	27.7	90.3	85.9	60	96	1051.1	2	2452	2007-2008	0.237470201
44655	3	3	2	72	3	20969.41369	20785.24215	20.93	100.7	55.6	58	158	894.7	1	2213	2007-2008	-0.652079925
44659	4	4	1	48	4	27601.38844	29836.63224	28.15	97.2	89.3	80	152	557.2	1	1769	2007-2008	0.626042734
44663	5	5	2	41	2	27313.93416	27721.52315	23.57	81.2	62.7	60	106	677.7	2	1463	2007-2008	2.775455317
44668	5	5	1	46	3	122044.5699	126286.5716	23.75	87.2	74.5	56	104	1089.3	1	707	2007-2008	3.258308328
44669	4	4	2	76	3	19606.00553	19376.486	30.04	102.4	65.8	60	154	633.8	1	2837	2007-2008	3.169652777
44671	5	5	1	48	4	50235.33268	50277.62806	28.47	96.1	90	72	116	758.8	1	2505	2007-2008	-2.022256691
44672	3	3	2	59	3	30582.71342	30485.5783	33.88	116.5	95.4	74	124	964.7	1	2117	2007-2008	0.877266779
44673	3	3	2	64	3	61297.24815	62009.20742	31.44	93.3	71.3	54	138	816.7	1	1268	2007-2008	0.796948651
44676	3	3	2	59	4	22105.5051	22859.74293	33.97	99.3	95.2	62	146	828.4	1	2249	2007-2008	-0.532812824
44681	5	5	2	53	1	9900.809686	9784.257815	25.33	93.9	66.3	72	126	487.3	2	987	2007-2008	0.950070405
44684	1	1	1	61	4	7237.067591	7080.744171	42.45	132	129.1	72	126	659.1	1	1393	2007-2008	3.154888191
44685	4	4	1	57	3	102792.3573	104663.6653	45.44	143.7	136	70	108	734	2	3565	2007-2008	2.332807268
44691	3	3	1	60	4	6134.056171	6094.545226	27.28	96.2	76.9	80	130	1051	1	2125	2007-2008	2.931183959
44692	3	4	2	49	3	27331.88202	27136.41889	16.42	69.7	43.4	70	100	1501.6	1	961	2007-2008	1.685626386
44695	5	NA	2	41	4	25898.20924	26781.8538	41.76	107.9	118	92	134	1505.1	1	2296	2007-2008	1.474386984
44698	2	2	1	74	3	29384.51223	28849.91604	24.34	99.4	77.8	56	140	907.2	1	1906	2007-2008	2.46060682
44701	3	3	1	44	3	29437.29548	29431.69671	23.94	88	77.9	64	112	888.2	2	1950	2007-2008	2.380177767
44706	3	NA	1	50	1	13072.56069	14019.63031	26.95	104.2	79	74	138	775.2	2	1898	2007-2008	2.258420497
44711	1	1	2	44	2	17096.98797	17352.11578	38.22	115.5	90.3	68	118	1105.6	1	1112	2007-2008	3.48943762
44712	2	2	2	48	2	17192.68001	17229.03767	29.59	96.8	73.3	72	126	703.4	1	907	2007-2008	4.040062043
44719	2	1	2	76	2	7716.623556	8134.334821	26.55	94	60.7	68	170	727.5	1	682	2007-2008	3.059486411
44720	4	4	1	58	3	79632.53077	79778.1333	31.38	117.5	103.6	96	140	789.8	1	2206	2007-2008	-1.59216346
44724	4	3	2	51	3	29941.78607	30103.00281	24.02	82.2	64.3	76	128	428.4	1	1363	2007-2008	-0.215543824
44731	4	2	2	60	2	5444.778132	5283.764153	29.95	94.7	62.2	54	102	408.5	2	1080	2007-2008	3.307073079
44732	5	3	2	53	2	11540.51984	11564.92478	26.71	93	67.6	72	132	848.8	1	1505	2007-2008	1.293325965
44733	3	3	2	44	3	21355.2989	21202.57713	25.72	92.3	63.4	80	116	1098.7	2	1025	2007-2008	3.77327075
44736	3	3	1	48	3	87980.10544	89660.66518	22.63	89	77.3	84	130	1147.5	2	5299	2007-2008	-2.05040905
44738	3	3	1	52	2	11327.76197	11355.75815	29.38	98.2	84.2	72	122	627.9	1	839	2007-2008	2.059145153
44749	3	2	2	59	4	21262.5998	21173.78091	15.44	69.8	46.2	72	184	427	2	843	2007-2008	3.166767138
44758	2	3	2	59	2	10478.1382	10500.2965	29.5	91.1	59.4	64	118	755.8	1	804	2007-2008	2.777643691
44760	3	3	1	46	2	23538.03593	24272.23748	30.16	109.2	88.4	72	104	702.5	1	3239	2007-2008	-1.862587963
44763	5	5	2	68	3	59356.35643	60045.7725	21.77	83.4	61.3	70	128	858.9	1	1775	2007-2008	-0.678691945
44771	3	5	2	78	3	35990.28753	34984.67872	36.21	113.3	90.5	70	144	631.4	1	1622	2007-2008	-1.749683859
44774	3	3	2	68	3	21576.59974	23816.48384	26.44	88.5	66.1	60	146	844.6	2	1285	2007-2008	-2.037794505
44778	3	3	2	53	3	26737.1021	26839.11999	29.25	86	61	62	128	804.5	2	517	2007-2008	4.228659082
44780	3	3	2	49	3	107369.6939	106601.8427	42.18	120.9	112.2	76	120	825.1	1	1795	2007-2008	2.025376972
44782	5	5	1	53	2	14772.34746	14808.85681	23.65	94.3	78.6	84	114	481.1	1	3344	2007-2008	-1.847595991
44784	2	2	2	52	3	103644.0987	103314.91	26.38	85.5	72	78	118	696.9	1	3753	2007-2008	0.190279359
44785	5	5	1	46	4	26885.34747	26736.3561	32.87	113	115.3	70	104	1104.9	1	4638	2007-2008	-2.884029007
44790	4	4	2	50	3	104007.45	110253.564	23.95	75	71.1	66	118	1103.8	2	1850	2007-2008	2.038882812
44791	4	4	1	64	2	8017.063535	8416.894568	28.31	101.5	85.8	78	144	386.8	1	3346	2007-2008	-2.074426666
44792	3	3	2	53	3	30689.92908	30592.45344	18.43	76.9	50.9	74	122	838.3	1	897	2007-2008	3.765654063
44793	3	3	2	51	5	89022.2035	89795.2765	28.55	92.6	69.3	70	132	887.4	2	749	2007-2008	3.379447412
44795	5	5	1	61	3	21953.47823	22555.67592	34.76	117.1	117.3	98	152	680.5	1	1650	2007-2008	2.939780711
44807	3	3	2	56	4	21711.85987	23112.68042	32.9	104.5	83.8	74	138	658.2	1	1701	2007-2008	1.156576735
44811	2	2	2	67	3	65378.89265	66138.25967	37.92	126	93.7	64	110	859.7	1	1792	2007-2008	2.502580331
44817	5	5	2	70	2	9372.219386	9983.384466	24.15	97.8	68.8	84	146	847.4	2	1257	2007-2008	2.511334245
44818	2	2	2	41	4	22636.42608	22541.86839	35.25	100.7	90.7	78	154	2137	2	1683	2007-2008	2.412698389
44821	3	2	1	67	3	17475.1574	17097.14919	20.73	90.6	59.5	64	118	737.6	2	1500	2007-2008	1.179827
44825	3	3	2	50	3	109492.6497	112034.1147	20.07	78.5	56.1	58	110	824.8	2	1853	2007-2008	1.917694477
44826	2	2	1	66	4	6180.685156	6338.760659	29.82	112.2	86.8	68	134	937.1	1	2813	2007-2008	-2.277146882
44831	5	5	1	48	3	24815.29085	25289.30232	23.26	91.1	76.3	68	106	983.1	1	2317	2007-2008	2.662060733
44838	3	3	2	71	3	19606.00553	19376.486	22.97	89.5	61.4	60	134	698.3	1	1331	2007-2008	2.431342977
44842	2	4	2	73	3	37177.63745	40991.79501	25.31	97.6	64.7	54	140	370.6	1	867	2007-2008	3.82140447
44848	2	2	1	40	1	19124.67725	20234.00921	30.25	96.8	86.1	72	124	684	2	1295	2007-2008	1.747266735
44850	2	2	1	72	3	8582.412752	9156.522239	27.24	101.6	82.1	0	140	678.7	1	774	2007-2008	3.284937188
44852	4	4	2	42	3	97373.94673	99236.781	30.24	106	96.9	78	104	636.8	1	2113	2007-2008	2.589404168
44853	2	2	1	52	5	50792.34349	51797.46961	24.45	86.5	68.6	76	118	917.3	2	1152	2007-2008	2.692258324
44865	2	2	2	49	3	85964.78414	85350.00958	22.44	81	58.6	74	94	651.8	2	1875	2007-2008	2.530621228
44866	3	3	1	59	3	21545.7368	21585.13168	22	90.4	68.6	64	98	830	1	2143	2007-2008	1.718281119
44869	3	3	2	45	3	77824.38446	77267.82572	29.53	108.8	92.1	92	152	866.4	1	718	2007-2008	3.967828495
44870	3	3	2	62	3	23989.80008	28502.84325	26.94	95.5	69.4	72	126	610.6	1	2673	2007-2008	1.374530339
44871	4	4	2	52	2	15524.72076	15341.96447	50.43	139.1	124	84	154	1071.1	1	1887	2007-2008	2.663865852
44876	2	1	2	55	1	10083.63305	10415.27329	25.35	88.6	53	58	128	849.2	1	1685	2007-2008	2.592101818
44878	5	5	1	71	3	30052.77379	29506.01983	17.79	71.7	52.5	82	150	654.9	1	1913	2007-2008	0.505114941
44882	1	1	1	47	3	33936.61279	35357.89666	50.46	155.9	171.4	86	122	696	1	717	2007-2008	4.065249263
44883	2	2	1	50	4	20000.25749	19889.42144	31.97	111.1	102.2	84	150	408.7	1	1164	2007-2008	2.405654823
44885	3	3	2	65	3	61297.24815	62009.20742	30.19	110.9	84.2	74	116	580.8	1	1413	2007-2008	2.156343749
44886	3	3	1	51	5	70355.1165	71843.77178	20.31	78.6	66.1	72	126	405.9	2	1639	2007-2008	0.630015885
44891	5	5	2	50	3	30810.33824	32562.23459	35.62	101.3	97.2	62	108	947.7	1	1705	2007-2008	2.442334118
44892	3	3	1	45	1	23006.46709	24673.21982	24.07	93.2	70.7	106	154	579.9	1	3064	2007-2008	0.075879342
44893	4	4	2	44	3	30055.17538	31733.06557	33.11	91.2	81.4	84	132	750.7	1	1897	2007-2008	-0.029842035
44899	3	3	2	76	3	31860.18762	34106.14387	29.57	102	75.8	68	154	798.8	1	1226	2007-2008	-0.891597874
44905	4	4	2	74	3	22147.57128	25285.12093	22.96	84.5	55.3	80	148	480.3	1	1838	2007-2008	-0.313916624
44906	3	3	1	70	3	36500.574	36416.07747	30.03	106	96.1	68	122	972.5	1	1595	2007-2008	-2.731468382
44910	1	1	1	62	1	7530.882625	8337.976819	24.26	95.5	70.6	62	164	683.8	1	1535	2007-2008	1.391780889
44915	4	4	1	69	4	5758.083982	5576.083917	29.28	101.2	74.4	52	126	1195.5	1	1125	2007-2008	2.172756212
44916	2	2	2	71	4	11504.05308	12902.85314	46.01	121.5	111.4	72	126	694.4	2	601	2007-2008	3.318400673
44927	1	1	2	41	1	16260.04848	16501.9375	37.81	110.5	95.6	82	106	1187.6	2	1968	2007-2008	-0.669794235
44928	3	3	1	77	4	9827.240072	10149.3736	30.08	106.1	85.7	94	146	547.6	2	1103	2007-2008	2.38642485
44934	4	2	2	50	3	34320.13464	34211.12893	29.23	116.5	87.8	72	126	1369.7	1	1374	2007-2008	3.176315591
44937	3	1	2	49	3	29253.34768	30886.47423	38.18	118.3	101.2	72	126	634.5	1	1773	2007-2008	2.189639362
44938	3	4	2	56	3	96663.55644	96356.53903	21.46	82.3	60.7	80	118	959.2	1	1542	2007-2008	2.16088776
44939	4	5	1	56	3	73285.01685	74292.55143	29.93	113.5	116.5	80	128	700.2	1	4963	2007-2008	-1.410280119
44940	4	1	1	40	2	17164.15044	18845.54758	29.02	98.5	82.5	76	114	589.4	2	2066	2007-2008	1.990209153
44941	5	5	2	64	3	69052.17791	70506.76398	23.87	88.3	63.5	60	152	690.7	1	1558	2007-2008	3.00695088
44951	4	4	1	60	4	7043.120456	6884.218112	28.44	99.7	85.6	74	122	1124	1	1167	2007-2008	2.5587857
44958	5	5	1	43	3	28803.80468	31602.18892	30.9	105.8	91.2	70	106	885.4	1	2434	2007-2008	2.19884538
44959	1	1	1	62	3	21953.47823	21478.59867	18.97	79	55.6	64	126	743	1	1428	2007-2008	2.775933117
44967	3	3	2	43	5	33681.17008	33440.30021	23.49	73.2	60.2	72	126	782.3	2	1561	2007-2008	2.405560736
44970	5	3	2	56	3	105908.4124	105572.032	48.94	123	127.5	58	116	567.4	1	1099	2007-2008	3.225763322
44971	1	1	2	74	4	11681.94643	12140.57549	28.67	99.9	69.6	92	182	601.5	1	1482	2007-2008	-0.972782402
44972	4	4	1	44	4	24334.89218	23968.61337	34.38	116	107.1	88	118	982.8	1	2032	2007-2008	1.490067665
44973	2	2	2	47	1	14749.89473	15997.47665	28.35	97.5	68.2	64	116	784.3	2	1349	2007-2008	1.71717318
44980	4	3	1	76	3	30052.77379	34654.28823	36.53	130	106.7	54	98	840.1	1	1400	2007-2008	0.372073261
44986	5	5	1	71	3	30052.77379	29506.01983	24.83	96.8	75.1	88	134	796.2	2	2075	2007-2008	-0.959310542
44988	4	2	1	79	3	26604.03896	26120.02827	27.35	111.4	79.6	82	156	587	1	1405	2007-2008	1.892654374
44996	3	4	2	41	2	26982.91065	27039.97189	31.28	95.4	82.7	62	104	654.9	2	1908	2007-2008	-0.864059757
44998	4	4	2	46	2	17358.05246	17153.71428	27.25	93	77.1	76	130	1158.1	1	1373	2007-2008	2.106635704
45006	4	4	1	49	4	20349.18938	21997.1282	35.51	115.5	95.5	90	126	832	1	2185	2007-2008	1.650391662
45009	2	2	2	60	3	26193.62583	27898.94684	30.39	105.5	86.9	60	152	585.4	1	895	2007-2008	3.115248528
45012	5	5	2	44	3	61948.87908	61505.85354	30.05	98.8	84.5	84	122	964.9	2	1900	2007-2008	-0.55806771
45013	3	5	2	67	3	59356.35643	60045.7725	26.59	100.4	74.7	54	134	970.2	1	2265	2007-2008	1.475816648
45018	2	5	1	71	4	8977.683674	10083.96352	25.86	90.9	72.3	68	130	1105.4	2	995	2007-2008	2.451346542
45019	2	4	2	40	4	23833.86139	24255.75157	18.45	70.1	53	64	96	681.6	2	3550	2007-2008	0.89488431
45020	5	5	2	59	3	96663.55644	96356.53903	39.81	116.9	93.8	56	106	1007.4	1	2319	2007-2008	-2.610311486
45023	3	3	2	52	3	101232.6848	107312.1617	35.89	109.5	94.9	72	126	654.1	2	2787	2007-2008	-1.922123875
45025	2	2	1	67	3	21648.65723	21180.3713	31.5	113.1	94.6	90	130	390.1	1	2157	2007-2008	2.128190014
45028	5	4	1	61	3	38702.43363	39017.34617	34.08	114	96.2	82	128	681.5	1	4720	2007-2008	-0.838178382
45029	1	2	2	68	1	6890.455959	7760.941897	31.87	105.7	82.6	82	130	1041.6	2	1168	2007-2008	3.097558487
45034	2	2	2	47	3	92970.0041	92305.13192	27.73	102.4	79	90	106	1135.7	1	4606	2007-2008	-0.07225007
45035	4	4	2	45	4	25458.24827	27598.59012	29.62	102	84.4	80	126	1246.1	2	1299	2007-2008	3.303105814
45036	5	4	2	42	3	68460.33534	68447.49112	23.02	81	60.2	66	106	1211.1	1	3084	2007-2008	-0.065122367
45044	1	2	2	42	3	92495.8518	97659.61745	31.4	98.2	85.6	54	114	552.8	1	1763	2007-2008	2.446552968
45045	3	4	2	45	2	23849.4058	23568.65171	32.59	93.6	76.7	54	108	961.2	2	2040	2007-2008	-0.413140257
45049	4	4	1	76	3	26614.68233	26130.47801	32.64	118.5	96	90	130	652.7	1	2365	2007-2008	-3.729355832
45051	4	3	1	57	4	21115.14353	20797.32705	33.21	114.8	96.2	80	164	334	2	1432	2007-2008	2.457788381
45052	4	4	2	40	3	129047.3825	133678.2268	26.38	85.1	71.9	62	112	1100.6	2	3814	2007-2008	2.049530606
45056	2	2	2	60	3	59522.80391	60214.15324	42.67	100.7	103.7	82	140	840.1	1	1701	2007-2008	1.484852855
45057	5	5	1	79	1	7153.392031	7507.233794	28.17	102.7	84.7	52	130	435.7	1	1226	2007-2008	1.598613504
45059	2	2	1	77	2	7080.450083	7523.098807	19.3	79.7	58.1	72	126	562.8	1	1152	2007-2008	3.222885125
45060	3	3	1	66	3	54670.91934	53488.32304	26.3	106.4	87.2	60	120	854.2	1	2297	2007-2008	0.464960803
45061	3	3	1	43	3	28803.80468	31602.18892	23.87	87.2	73.7	48	110	876.9	1	4008	2007-2008	-0.033726849
45064	5	5	1	44	2	16596.32699	17559.00133	32.07	102.4	90.2	82	134	716.8	2	2900	2007-2008	1.015957103
45072	5	5	2	56	2	11476.28693	11341.18861	31.09	89.8	77.9	60	112	839.7	2	1267	2007-2008	0.035194589
45078	4	4	1	78	3	35245.13839	36197.09589	24.38	100.7	71.8	74	120	733.3	1	878	2007-2008	3.659044388
45083	4	4	1	68	2	8017.063535	8544.437564	31.87	111.3	94.4	68	136	949	1	582	2007-2008	2.883671532
45084	4	3	1	43	1	12003.29479	14384.21849	40.03	137.9	125	70	120	607.8	1	3048	2007-2008	-0.229940641
45087	5	5	2	63	5	21737.72749	22319.4537	34.83	110.1	94.6	80	138	873.3	1	1728	2007-2008	-2.522675787
45088	4	5	2	73	3	49559.87731	50393.11874	37.85	104.9	86.3	70	132	877.4	1	644	2007-2008	3.701829754
45089	1	1	1	79	3	8872.862854	9172.058664	29.34	113.1	83.8	76	156	1078.3	1	2324	2007-2008	2.103849274
45096	4	5	2	58	3	29941.78607	30103.00281	34.74	112.7	94.7	80	136	531.4	2	1705	2007-2008	1.427991965
45099	3	3	2	70	4	11824.91243	12826.4586	35.52	111.7	83.7	72	126	1233.9	1	366	2007-2008	3.607398371
45103	3	3	1	40	3	122044.5699	124015.9702	33.38	118	119	86	130	695.9	2	4153	2007-2008	0.073468123
45110	4	4	1	52	1	17560.19321	18832.37897	28.31	93.4	74.2	78	108	848.5	2	2234	2007-2008	1.477750593
45113	4	4	2	78	3	36091.21173	35668.7066	31.52	106.6	80.9	48	132	637.6	1	1579	2007-2008	1.46818327
45119	4	4	2	72	3	35990.28753	34984.67872	23.67	86.5	65	50	162	511.5	1	923	2007-2008	3.241764957
45124	3	3	1	66	4	6554.890326	6512.668685	47.11	143.6	167.2	70	110	778.2	1	1829	2007-2008	2.396555116
45131	3	5	1	41	3	30901.63116	32195.80834	31.6	117.9	106.3	52	128	520.1	1	1707	2007-2008	-0.241859335
45137	2	2	2	51	4	21250.1215	21502.82309	33.72	102.8	87.4	72	126	1601.1	1	1394	2007-2008	3.070669644
45142	2	2	2	61	3	29136.7938	29951.8992	20.7	83.8	50.7	50	96	812.8	1	2817	2007-2008	0.315563823
45144	4	1	2	46	2	17358.05246	17153.71428	40.44	111.7	89.9	70	126	1037.4	2	873	2007-2008	2.1063392
45145	3	4	1	53	3	22515.39801	24752.7181	27.9	108.8	87	74	118	937.7	1	1420	2007-2008	3.837968569
45147	3	3	1	72	1	10263.83295	10464.60145	26.92	106.6	67.2	80	140	1156.2	1	587	2007-2008	3.812238629
45153	4	4	2	63	3	55604.39463	57189.67701	36.13	117	93.2	64	122	1116.8	1	1528	2007-2008	3.031523682
45157	1	1	2	49	1	25274.17312	25651.32401	31.87	97.6	82.4	74	134	450.6	1	1836	2007-2008	0.253411795
45165	2	4	1	59	4	19637.94688	19767.3222	19.4	76.7	59.4	62	138	549.3	2	2329	2007-2008	1.005746552
45169	4	5	1	60	3	53088.2953	52807.39081	33.69	116.1	103.4	70	138	833.1	1	2661	2007-2008	1.794281577
45171	4	4	1	61	3	55531.60863	54330.39462	25.06	92.1	73.2	74	142	690.2	1	1195	2007-2008	1.941325341
45172	3	1	1	73	3	9471.568094	10921.80219	28.76	104.2	80.6	70	142	927.4	1	1719	2007-2008	-0.777130423
45174	3	3	2	74	3	20747.60595	20783.50754	18.81	74.5	54.3	56	122	547.2	1	1997	2007-2008	3.846149827
45176	2	2	1	65	3	22416.92549	22325.66927	24.49	102	68.8	52	114	951.4	1	1664	2007-2008	2.970062519
45179	4	4	2	63	3	58846.01837	62270.26674	21.52	71	47.9	74	126	976.9	1	3126	2007-2008	-0.717540358
45185	4	4	1	69	3	46864.6789	45850.94077	30.06	104.7	92.6	48	134	1257.5	1	1744	2007-2008	1.403981465
45186	4	4	2	63	4	9544.755375	9227.136084	42.39	129.3	122.8	74	122	443	1	2194	2007-2008	2.762847919
45187	2	4	1	53	4	19030.03667	18743.60437	33.67	118	117.6	70	114	901.4	2	2326	2007-2008	2.184095577
45190	4	4	2	60	4	12411.49614	12178.12642	36.98	113.3	88.5	56	124	756	2	1917	2007-2008	1.658835453
45194	3	3	1	40	3	22505.36051	22501.08015	26.01	92	74.3	98	162	2482.8	1	2687	2007-2008	0.872434731
45197	4	4	1	46	3	82011.62348	91163.60298	31.54	111	88.8	62	116	595.1	2	2793	2007-2008	1.052813322
45200	4	4	2	43	4	28558.83099	28439.53401	26.57	82.4	70.5	62	114	1233.8	2	1301	2007-2008	2.620776794
45204	5	5	1	72	3	23204.91726	23831.67307	27.5	94.3	79.2	98	186	1040.7	1	1666	2007-2008	0.812685459
45207	2	2	1	43	1	21806.12294	23070.99287	24.78	89.4	75.8	60	114	473.5	2	3788	2007-2008	-1.400505185
45212	5	3	2	41	3	80591.33243	80702.13542	27.95	91.2	73.8	80	100	725.5	2	3539	2007-2008	0.247381041
45215	4	4	1	71	3	31471.06262	32701.95146	24.81	100.2	72.2	66	132	430.1	1	2194	2007-2008	3.304409335
45216	2	2	1	41	3	30901.63116	32195.80834	31.05	105.7	95.3	72	106	1350.5	1	3430	2007-2008	0.513622876
45223	2	2	2	61	4	11630.61	13049.92005	35.79	114.5	87.2	70	142	784.1	1	1065	2007-2008	0.922427911
45229	2	2	1	68	4	6180.685156	6082.492346	34.54	107.5	93.8	58	146	821	1	2615	2007-2008	0.664308281
45233	3	4	2	51	3	21806.31457	21737.05457	36.6	116	95.7	72	126	794	2	2717	2007-2008	1.577633267
45234	4	4	2	51	4	21262.5998	21173.78091	34.93	115.8	100	64	116	1606.8	2	1546	2007-2008	3.0483153
45237	1	2	1	44	1	14099.71387	14917.5715	35.34	117.9	100.1	74	126	1055.9	2	1674	2007-2008	2.012396303
45243	2	2	2	76	3	31860.18762	34106.14387	23.19	82	55.2	54	140	1146	1	1027	2007-2008	3.28026589
45247	5	5	1	62	3	40876.91339	41833.97579	27.62	100.4	84.4	76	140	662.3	1	4086	2007-2008	-3.052344386
45255	2	4	1	67	3	53088.2953	52807.39081	33.59	107.7	89.9	82	134	751.2	1	1080	2007-2008	1.335636598
45257	5	5	2	78	3	34075.75569	33123.64105	27.37	91.3	67.2	64	146	729.8	2	1591	2007-2008	-2.312629399
45261	2	2	1	42	1	15222.69943	16748.23634	21.44	85.5	64.4	50	104	891.3	1	1136	2007-2008	1.522830489
45262	4	4	1	61	4	6302.970309	7783.324159	41.3	100.7	119.5	82	154	653.9	1	2386	2007-2008	-0.197103552
45264	1	1	1	50	1	11285.08074	11615.3846	32.62	115.6	96.5	80	126	884.2	2	2759	2007-2008	0.948507281
45267	5	5	1	69	3	64448.29287	65957.23844	28.93	106.5	89.7	58	118	508.2	2	1455	2007-2008	1.818881798
45268	2	1	2	42	1	16895.41969	17107.4944	35.05	109.5	74.5	64	116	963.3	1	1201	2007-2008	2.649768606
45270	5	5	1	61	3	45081.58629	46137.09384	27.84	105.6	88.5	74	116	986.5	1	1480	2007-2008	0.679444466
45271	4	4	2	47	4	41632.25468	45132.38776	29.37	97.7	78.6	58	90	701.3	1	1682	2007-2008	2.616394217
45273	5	5	1	50	4	19455.19292	20990.82473	28.05	93.1	82.2	64	116	899.8	2	1393	2007-2008	1.024247194
45276	4	4	2	40	1	17735.22107	17994.95173	36.71	115.7	96.7	70	114	755.9	2	1166	2007-2008	1.44876948
45277	4	4	1	70	3	28153.11442	29027.01756	34.82	131.5	119.8	46	102	526.7	1	3237	2007-2008	-3.064824817
45278	4	4	1	69	3	47614.47603	52202.2126	34.08	119.1	97.9	66	102	1431.4	1	645	2007-2008	2.071622443
45281	1	1	1	64	3	55531.60863	54330.39462	24.54	96	66.9	76	126	738.3	1	1129	2007-2008	2.821116301
45282	3	3	1	74	3	8384.649228	8232.10623	30.07	107	87.4	56	150	1012.5	1	1561	2007-2008	3.277030598
45285	2	2	1	66	3	17290.31078	21571.18261	29	108.5	88.8	42	114	443.8	1	616	2007-2008	3.813765487
45286	5	5	2	58	3	94583.35604	94282.94564	22.35	76	56	44	94	1052.5	2	1610	2007-2008	2.780273915
45293	3	3	2	76	1	10060.79733	10569.25917	19.11	77.1	45.5	62	150	742.9	1	1610	2007-2008	3.063078527
45295	5	3	1	74	3	8872.862854	8856.928949	31.01	111.2	98.7	78	186	1097.3	1	1831	2007-2008	1.232941642
45296	4	4	1	43	2	23538.03593	25896.89106	26.78	102.1	84	82	142	738.7	2	1270	2007-2008	2.244381001
45299	4	4	1	60	4	6009.670477	7421.138149	27.87	103.1	89.9	64	114	1350.1	2	2154	2007-2008	2.471388909
45302	4	4	1	67	3	53088.2953	51939.93303	32.52	116.4	115.2	64	132	752.4	1	2410	2007-2008	0.946535265
45303	3	3	2	45	3	30055.17538	31733.06557	18.24	78.7	47.7	78	114	929.2	1	1850	2007-2008	3.363321434
45309	2	2	2	62	1	5673.261858	6466.100039	29.57	109.7	77.6	72	126	683.9	1	1200	2007-2008	1.924492003
45310	3	3	2	47	4	30227.87557	30101.6066	24.27	85	66	70	132	1509.1	1	1667	2007-2008	-0.142391013
45311	2	2	1	68	4	7237.067591	7080.744171	35.34	120	103.1	90	138	575.3	1	964	2007-2008	3.905840702
45313	2	2	2	51	1	16965.19077	17218.35185	40.25	118	96.2	42	124	745.1	2	1497	2007-2008	1.915557075
45317	3	4	2	43	1	14749.89473	14576.25966	21.64	73.7	56.5	58	108	1106	2	774	2007-2008	-0.105882186
45318	4	4	2	47	3	31016.10459	30794.29385	61.7	140.8	151.3	86	128	1050.7	1	1839	2007-2008	0.370067629
45319	5	5	1	60	3	38702.43363	39608.58433	40.3	129.4	130	74	122	840	1	2941	2007-2008	0.091644994
45326	3	1	2	78	3	25886.26323	25583.22328	23	86.4	58.3	54	114	1632.5	1	2377	2007-2008	-0.269106805
45334	1	3	1	71	4	10981.24094	11053.93343	28.35	110.1	82.7	60	142	900	2	1517	2007-2008	3.150403507
45338	2	2	2	43	5	52317.21344	53808.34078	27.47	95.7	71.2	76	110	1431.1	2	1161	2007-2008	1.66641347
45340	2	3	1	78	2	7872.351714	7898.124273	24.2	91.4	71.6	66	120	428.9	1	2422	2007-2008	-0.720459455
45343	5	4	1	78	3	35880.50719	36299.57063	29.97	103.5	80.7	60	122	750.6	1	1079	2007-2008	1.54826033
45348	5	5	2	67	3	55310.0861	57654.92135	24.96	90	69.2	68	114	1095.8	2	1439	2007-2008	2.117289286
45356	1	1	2	73	1	11558.91437	12163.57908	23.9	86.5	55	72	126	1034.4	1	1107	2007-2008	3.19529161
45360	3	3	1	63	3	56919.89885	55688.65448	29.04	109.7	96.6	76	124	552.1	2	1482	2007-2008	1.908846234
45363	5	4	2	56	4	21262.5998	21173.78091	27.08	91.8	75.6	64	102	1644.1	1	2856	2007-2008	-2.532540462
45365	4	4	2	52	3	117656.735	122366.8257	44.49	141.2	116.9	62	116	798.6	1	2960	2007-2008	-0.3537299
45366	2	2	2	75	4	11413.45706	12380.15379	38.73	130.6	110.1	92	168	1180.8	1	2586	2007-2008	-1.666536944
45367	1	1	2	61	1	4380.546466	4735.517375	26.94	84	63.9	72	126	509.4	2	1377	2007-2008	3.241362029
45368	2	3	1	50	2	9970.337025	9994.97837	23.87	91.8	69.4	82	170	1209.5	2	2438	2007-2008	2.792837199
45371	2	2	1	52	2	14772.34746	15296.6702	26.77	94.9	67.5	88	152	1382.5	1	2119	2007-2008	1.758252274
45375	4	4	2	51	2	18281.44688	18320.10698	23.74	88.2	67.4	80	126	517.3	2	1693	2007-2008	0.517937565
45391	3	3	2	78	4	13104.92612	13027.58664	21.27	74.5	50.7	64	142	1267.4	1	2170	2007-2008	0.916906083
45392	3	5	1	56	3	92508.104	96770.54072	28.77	100.7	92.7	72	126	928.4	2	2022	2007-2008	0.811619896
45393	3	3	2	59	3	27909.12082	27820.47742	16.86	72.7	48.9	72	124	1367.8	2	1002	2007-2008	3.095320671
45401	3	4	2	56	3	27909.12082	27820.47742	22.43	89	58	82	118	736.4	1	1148	2007-2008	3.272114574
45410	4	4	2	50	4	20683.13277	22422.0181	39.09	110.3	102.6	80	110	895.3	1	3053	2007-2008	0.680996356
45420	4	5	2	76	3	42969.40373	43691.84069	24.5	89.8	64.3	74	114	866.5	1	1392	2007-2008	1.602035966
45421	3	3	2	69	1	8251.2084	8934.74856	26.19	97.2	68.4	78	142	914.3	1	1024	2007-2008	-0.214184366
45422	3	3	1	75	3	37294.06474	40857.0805	37.55	128.2	120.3	62	134	793.3	1	1947	2007-2008	2.164010033
45425	3	3	2	77	4	13260.51216	13238.23975	29.42	109.9	89.8	66	136	920.7	1	724	2007-2008	3.93706102
45431	5	4	2	65	3	52544.8609	53155.16237	25.97	86	70.8	66	122	1594.5	1	1285	2007-2008	2.826080203
45433	4	4	2	49	3	30055.17538	29840.2367	42.85	126.7	110.8	66	154	603.5	1	1642	2007-2008	2.32369302
45435	5	5	1	67	3	14251.36222	13943.08849	20.59	77.1	51.6	96	174	1104.2	2	899	2007-2008	2.279388725
45439	4	4	1	43	3	88836.10833	92556.61303	30.1	103.5	95.7	80	122	880	1	2379	2007-2008	3.319990691
45443	4	4	2	43	4	23833.86139	24255.75157	25.2	87.8	73	64	122	961.3	2	2948	2007-2008	0.304699293
45444	3	2	1	73	3	11265.8589	11398.52493	26.57	96.2	70.5	84	130	1254	1	2695	2007-2008	0.119747852
45447	1	1	2	75	3	20747.60595	20167.89468	30.37	102.9	69.8	62	182	583.2	1	846	2007-2008	3.42383614
45450	5	5	1	47	4	30094.45309	32469.86	31.27	109.3	103.8	72	116	660	2	2177	2007-2008	-1.809959478
45451	3	3	2	75	3	43814.1208	47523.47805	33.46	113.1	86.4	52	108	632.8	1	2274	2007-2008	-0.260616687
45458	4	4	1	51	3	89799.91034	93154.65019	38.7	128	113.3	76	128	658	2	2943	2007-2008	2.326712682
45462	3	3	1	69	3	19360.58776	19562.48332	27.55	107.5	74	68	136	511.1	1	2207	2007-2008	-0.197042657
45463	1	1	1	61	1	5960.406092	6431.49581	32.26	104.2	90.4	68	126	1523.9	2	2068	2007-2008	-1.923693876
45471	4	4	2	54	3	84879.68083	88621.81701	20.92	85.4	62.1	72	114	978	1	1087	2007-2008	2.157769924
45472	1	1	2	77	2	10944.02877	12293.93236	30.5	102.8	73	70	130	587.8	1	1032	2007-2008	2.334097955
45476	3	3	1	65	3	21471.92905	21421.50086	33.17	117.2	84.5	72	126	593.1	2	1318	2007-2008	0.816501482
45477	2	1	1	56	2	14567.16295	15021.54384	43.02	136	112.2	62	122	669	1	440	2007-2008	3.281390892
45482	1	2	1	74	1	7804.666282	8722.675542	26.46	103.9	77.2	72	126	658.8	1	2258	2007-2008	3.981389035
45485	3	2	1	52	4	21097.15018	21246.8262	16.85	73.2	50.5	92	146	584.4	2	2730	2007-2008	2.285607981
45492	1	1	1	78	1	6971.740496	7933.836786	32.21	110.4	90.7	54	130	655.5	1	581	2007-2008	3.073770091
45496	4	4	2	67	3	59522.80391	60214.15324	26.2	89	63.2	72	126	709.1	1	1364	2007-2008	2.251689183
45497	1	1	2	54	2	11540.51984	11404.66537	28.6	98.2	75.9	72	126	1063.2	1	5290	2007-2008	-3.336266714
45499	4	5	1	73	3	25749.8736	28330.12334	37.65	127.7	118.1	62	102	699.8	1	2729	2007-2008	-0.555056841
45501	4	4	2	47	3	34403.62375	34397.16909	27.8	98.6	86.5	66	108	677.4	1	3496	2007-2008	-0.740393962
45505	5	5	2	51	3	161231.1247	167685.6061	22.04	79.6	56.7	72	114	898.8	2	2886	2007-2008	0.655984844
45507	1	1	1	70	3	10183.64784	9998.375428	28.35	118.7	98.5	66	136	893.9	1	824	2007-2008	2.834355675
45519	5	5	2	54	3	95352.03813	95049.18628	23.22	84.5	72.1	94	152	600.2	1	1382	2007-2008	1.06433198
45520	2	2	2	78	3	36127.10233	44781.04806	29.64	114.7	75.6	68	150	530	1	1158	2007-2008	3.434856337
45523	5	3	2	71	4	17871.32633	19908.26782	29.47	99.7	76.4	84	116	1045	1	1423	2007-2008	2.535237482
45529	3	3	1	49	1	25629.50472	26853.9821	28.9	102.7	87.9	84	136	634.8	2	2027	2007-2008	0.469791831
45530	5	5	2	50	4	22685.67908	22590.91564	34.69	118.7	102.4	62	124	830.4	1	3183	2007-2008	0.330314413
45534	4	4	2	55	4	20877.42148	21589.75721	52.91	158.2	156.9	86	132	900.2	1	1253	2007-2008	2.213595617
45536	2	3	2	76	2	7716.623556	7977.11435	26.19	86.4	63	78	136	890	2	1356	2007-2008	2.92245557
45544	2	2	2	41	4	30382.40061	31362.62796	23.69	82.4	59	72	126	1165.7	1	4839	2007-2008	-2.870579929
45549	3	3	2	50	3	95352.03813	95049.18628	29.13	95.3	79.5	74	104	370.5	1	2466	2007-2008	-2.192654357
45553	4	5	2	68	3	36045.60922	38592.57594	22.75	87.1	60.3	66	144	639.7	1	1384	2007-2008	1.689822602
45556	4	4	2	56	3	137274.9271	136838.9221	21.9	83.5	63.9	68	110	1387.8	1	1149	2007-2008	2.280110798
45558	1	4	2	73	2	6611.771763	7145.473727	37.49	106	83.8	56	154	569	1	1729	2007-2008	1.440480759
45561	3	3	2	79	3	19606.00553	20988.11386	31.47	101.7	75.4	54	144	796	1	2099	2007-2008	2.417173721
45568	3	3	2	58	3	31250.8543	31151.59708	29.76	106.1	83.9	66	140	757.5	2	1405	2007-2008	0.253778565
45573	4	5	2	52	3	27215.13543	28414.98376	18.11	66	47.3	72	120	718.2	2	2318	2007-2008	1.49942827
45588	2	2	1	79	3	30137.04798	29588.7608	43.9	147.3	136	32	128	802.3	1	1219	2007-2008	2.96145741
45593	2	1	2	50	3	29941.78607	30103.00281	18.7	73.3	50.1	66	110	1048.4	2	562	2007-2008	4.001216893
45594	5	5	2	78	3	35990.28753	35311.49373	24.29	97.3	68.8	70	124	743.9	1	1103	2007-2008	1.272874119
45603	1	1	1	61	4	7750.960967	7949.197413	24.33	94.2	82	80	122	572.3	1	1954	2007-2008	2.77251119
45607	3	3	2	64	2	6093.60926	6009.042032	22.54	84.6	58.5	58	102	491.1	2	1592	2007-2008	1.739369932
45609	4	4	2	48	3	82023.23072	85297.90368	32.93	101.5	90.3	74	116	887.7	1	2879	2007-2008	1.464731945
45610	4	2	2	42	4	24764.43774	24660.99084	22.62	82.8	65.3	68	124	1281.5	2	3070	2007-2008	-1.511389038
45612	2	2	1	68	4	6009.670477	5844.434775	30.33	112.5	106.3	76	152	1133	2	2563	2007-2008	0.358772917
45615	4	4	1	45	3	57321.69435	59314.07079	29.39	103.3	94.9	86	124	1001.7	1	2434	2007-2008	-0.392354141
45621	5	5	2	78	3	33536.86146	34100.71076	26.54	87.5	67.7	104	210	768.2	1	1237	2007-2008	2.381963573
45623	3	3	2	51	4	22105.5051	23531.72312	22	87.4	53.4	96	158	603.7	2	1839	2007-2008	3.551373007
45624	5	3	1	71	3	30052.77379	29506.01983	30.68	112.4	95.9	82	122	984.9	1	3067	2007-2008	-0.027850688
45625	3	3	1	76	2	8946.296724	9120.742087	28.38	111.1	83	68	144	907.4	1	2120	2007-2008	1.193374969
45628	1	NA	2	69	1	6890.455959	6806.706603	34.58	114.8	80.2	72	126	741.7	1	1544	2007-2008	0.620241319
45631	2	2	2	48	2	23128.20913	22855.94493	31.68	102.7	85.3	82	126	1181.7	1	877	2007-2008	3.738373705
45632	3	5	1	76	3	10432.59174	12029.97246	25.91	96.7	68.5	80	128	757.9	1	1659	2007-2008	0.032120252
45640	3	3	2	73	4	19553.19009	19437.79581	30.83	102.4	80.6	72	170	908	1	1077	2007-2008	2.96435508
45641	5	5	2	62	5	62024.9895	64654.49873	24.72	88.2	67.7	60	116	887.9	1	822	2007-2008	0.98030669
45645	5	5	1	47	3	158054.8692	160857.8328	28.66	104	90.1	58	106	693.5	1	1813	2007-2008	2.363338636
45649	4	4	1	73	3	11503.68597	11953.61544	27.86	109.7	82.9	78	148	970.4	1	1594	2007-2008	1.36991693
45654	4	4	2	42	3	26186.97577	26222.97959	26.14	95	65	62	96	815.9	1	1163	2007-2008	3.143295138
45658	1	4	1	57	2	14772.34746	15296.6702	29.52	104.3	79.5	92	132	934.3	1	856	2007-2008	3.883446279
45660	3	3	1	65	3	81813.0193	80043.30746	33.64	125.2	103.5	84	168	1101.9	1	2245	2007-2008	0.000749948
45662	3	5	2	42	3	84002.0546	86684.29836	22.23	82.5	60.9	94	126	1341.6	1	1813	2007-2008	0.63706928
45663	2	3	2	46	1	23522.51993	23245.61392	30.03	98.7	68.3	84	146	664.5	2	982	2007-2008	3.064918301
45664	3	3	2	72	3	24495.86461	24196.5111	22.12	87	56.2	86	120	996.5	1	1944	2007-2008	0.798796781
45674	4	4	2	46	1	20002.447	19766.97912	30.62	92.2	69.9	68	114	585	2	1292	2007-2008	1.641043202
45675	1	NA	1	55	2	11184.65855	11386.82509	34.93	120.2	95.2	64	132	621	1	2237	2007-2008	-1.706932022
45678	4	4	1	66	3	20030.16435	20193.14505	31.29	114.6	78.4	66	110	1824.9	1	2233	2007-2008	-0.977392904
45684	4	4	2	55	3	73901.08876	73666.36823	29.79	93.4	80.7	94	124	1783.8	2	1623	2007-2008	0.094221942
45685	2	5	2	73	4	12580.87021	13245.13843	25.67	100.4	66.8	72	138	970.7	1	2463	2007-2008	-0.517511164
45691	5	5	1	60	3	54670.91934	53488.32304	26.12	98.4	82.3	78	114	1151.1	2	3801	2007-2008	-1.122640064
45692	3	3	2	44	2	23128.20913	23177.11876	28.65	96.4	63	60	104	1868.1	1	1550	2007-2008	1.729628353
45703	2	4	2	66	3	55310.0861	63466.14383	28.71	101.6	76.1	44	118	608.4	1	1598	2007-2008	0.760603331
45706	5	5	1	65	4	7338.014307	9061.464871	33.25	110.6	97	60	116	700.6	1	1590	2007-2008	2.602654047
45712	2	2	1	69	4	7237.067591	7146.446751	35.87	117.8	106.6	72	126	616	2	1825	2007-2008	1.419298798
45717	3	4	2	46	3	129047.3825	133678.2268	26.22	84	66.7	72	102	715.7	2	1285	2007-2008	3.415004089
45720	2	2	1	42	4	38539.48619	38325.91072	21.91	80.9	64.9	70	134	587.9	2	1492	2007-2008	2.020270547
45723	5	4	2	45	4	28558.83099	30959.84697	28.36	85.7	67.6	76	124	785.2	2	1383	2007-2008	1.925247866
45724	4	3	1	73	4	12184.17977	12980.69415	25.77	100.3	86.1	70	162	752.7	1	2198	2007-2008	2.988217974
45727	4	4	2	43	3	65721.67813	65251.67153	27.79	93	82.7	70	108	734.1	1	1983	2007-2008	-5.20E-06
45728	4	4	2	62	3	55604.39463	57189.67701	29.58	97	67.8	76	140	663.4	1	1314	2007-2008	2.893813644
45733	4	4	2	59	4	19905.92012	21190.22383	46.28	126.6	110.9	54	132	731	1	1759	2007-2008	2.086629749
45734	3	3	2	62	4	11494.14765	11330.65777	22.13	78.7	58	74	162	839.2	2	1283	2007-2008	2.130142124
45741	5	3	2	43	3	92244.05272	95189.46918	35.22	109.5	89.6	70	122	974.3	1	3445	2007-2008	0.233248647
45744	5	4	2	42	3	79769.99407	79199.52136	29.44	96.4	69.1	92	132	1116.2	1	1788	2007-2008	2.758476264
45746	2	2	2	61	4	10367.89486	10184.97836	16.64	82.2	57.8	74	130	551.6	2	1172	2007-2008	3.344035723
45750	5	2	2	45	1	22829.30217	23580.13425	26.78	89	70.9	56	92	899	2	2144	2007-2008	1.585714685
45751	2	5	2	45	2	14627.88946	14455.69063	26.24	92.2	61.5	66	108	905.7	1	1456	2007-2008	1.497654062
45753	5	5	2	67	4	9544.755375	10339.84961	28.8	102.7	72.8	74	158	741.4	1	1263	2007-2008	0.507537399
45754	5	5	1	65	3	20030.16435	19890.30011	37.43	133	126.3	76	144	774.2	1	634	2007-2008	3.06357696
45755	5	5	1	57	4	21097.15018	21246.8262	33.31	114.6	104.6	98	134	1104.5	1	1313	2007-2008	2.272900639
45756	5	4	2	66	3	62262.25635	62985.42406	18.11	100.7	51.9	80	136	440.1	1	1138	2007-2008	1.792738065
45763	2	2	1	54	4	19988.52001	20005.34925	27.46	98.9	78.7	72	112	805.4	1	1302	2007-2008	1.814835106
45766	4	4	1	42	3	115338.8957	120410.1831	42.73	137.1	131.9	78	130	1009.9	2	2089	2007-2008	1.121646742
45767	3	3	2	54	1	11904.69842	11764.55687	30.84	97.3	74.2	82	124	712.4	1	1363	2007-2008	1.948717199
45772	2	2	2	52	3	23060.75834	22987.51404	33.51	111.4	99.6	76	132	923.7	1	3058	2007-2008	0.889357606
45775	2	1	1	42	5	12882.37445	13462.00579	23.91	86.5	68.3	90	136	630.3	2	1948	2007-2008	1.062984531
45777	5	5	2	67	3	35079.61815	36566.79583	24.59	85.5	63.1	90	156	809.6	2	921	2007-2008	3.148654343
45782	5	2	1	46	3	75464.0677	76683.04766	29.89	106	99.1	74	118	744.9	2	3038	2007-2008	-1.128675744
45786	3	3	1	42	4	25280.86633	25460.22417	29.37	106.1	94.2	98	160	724.2	2	907	2007-2008	3.636420455
45787	5	5	1	66	3	49593.47222	48520.70708	36.39	128.5	121.2	52	102	834.6	1	1886	2007-2008	0.513150179
45790	3	3	1	51	5	22485.2132	23413.04471	28.92	107.7	82.3	98	164	1045.5	2	3350	2007-2008	-0.304909519
45796	4	4	1	42	3	37524.71499	37517.57806	29.68	111	104.9	74	110	617	1	1766	2007-2008	2.175704837
45806	3	3	1	64	3	18527.15477	19961.95406	28.8	100.7	NA	72	126	574.6	1	3123	2007-2008	1.220442643
45813	2	2	1	40	2	17925.18018	18249.18395	36.5	120	117.2	88	126	613.1	2	2964	2007-2008	4.205833755
45815	1	2	1	67	3	19360.58776	18941.79548	24.29	94.3	74.8	54	136	593.8	1	1315	2007-2008	1.829568607
45817	1	1	2	67	1	8030.083171	9044.540635	33.36	100	78.5	58	192	965	2	1248	2007-2008	2.841892335
45819	1	1	1	63	4	7237.067591	7080.744171	34.28	127	113.8	62	142	713.5	1	2527	2007-2008	1.814415797
45823	5	5	2	78	5	19054.33627	19085.487	28.1	95.8	59.9	62	160	871	1	1908	2007-2008	2.262992525
45826	4	4	2	62	3	22473.38602	22734.41136	30.94	107.5	81.9	74	148	1077.9	1	1913	2007-2008	-0.638236777
45828	4	5	1	70	3	27196.61929	27931.18941	38.24	125.4	121.7	54	114	1604.7	1	2335	2007-2008	-1.712353393
45831	2	2	1	62	4	7338.642463	7222.053136	28.28	103.9	86.8	84	152	547.8	1	1152	2007-2008	1.927266854
45832	3	4	2	44	3	74400.22008	75823.55028	27.11	91.5	71.4	80	114	1042.6	1	1924	2007-2008	2.511232285
45835	3	3	1	53	2	14772.34746	14808.85681	30.53	100.9	82	78	128	1117.3	1	2257	2007-2008	1.750118817
45836	4	4	2	52	3	99668.26078	99351.69999	32.42	115.1	95.8	98	134	620.2	1	1474	2007-2008	2.284216713
45838	4	2	2	62	3	69052.17791	69854.20964	27.02	97.5	76	92	160	1054.3	1	2121	2007-2008	0.468022553
45839	3	4	2	44	3	20129.38299	19985.42831	20.21	77	56.5	54	106	487.7	2	2494	2007-2008	2.250681383
45845	4	4	1	75	3	33512.41081	33395.34672	31.73	108.1	95.3	94	156	294.1	1	2490	2007-2008	-3.00833353
45850	1	5	2	53	5	117656.735	122366.8257	22.35	77.2	52.6	68	110	710.1	1	2121	2007-2008	0.475500831
45851	2	2	2	55	4	21262.5998	21173.78091	22.57	77	61.3	74	128	1353.8	2	1566	2007-2008	0.388492518
45853	1	1	1	54	1	16143.00808	17724.3743	25.95	95.3	68.2	72	114	585.3	2	1311	2007-2008	1.177579025
45856	3	3	2	55	3	95352.03813	95049.18628	21.91	86.8	61.9	78	122	757.2	1	1631	2007-2008	1.366937136
45858	2	2	1	49	4	23313.29717	23184.10114	26.51	92.5	65	66	114	932.7	1	2280	2007-2008	2.102577493
45871	1	4	1	77	1	8378.923626	9756.87947	26.31	101.8	68.2	62	192	299.2	1	748	2007-2008	3.007674427
45878	2	2	2	51	2	12873.99413	12722.44207	27.77	91.4	61	64	96	683.2	2	2107	2007-2008	-0.55789871
45882	4	4	1	67	3	49330.97891	50485.97866	35.26	128.5	127.7	56	138	789.4	1	2214	2007-2008	-1.69278928
45883	3	3	1	65	2	6909.238913	7153.91159	25.05	95.8	64.2	60	192	943.1	2	1642	2007-2008	2.134755272
45884	1	1	1	76	1	10263.83295	11189.84675	28.95	99.5	77.2	68	160	658.2	1	1152	2007-2008	2.551072453
45885	5	5	2	45	3	84798.42535	84191.99197	29.3	94.5	75.1	78	126	857.4	1	1718	2007-2008	1.498101185
45886	1	1	1	73	3	8825.899674	9177.01582	31.41	109.8	98.5	78	146	1419.5	2	2103	2007-2008	1.649644282
45887	2	2	2	49	3	27331.88202	27136.41889	19.6	72	47.1	66	132	1130.9	1	1153	2007-2008	3.049109819
45889	2	1	2	67	1	5454.459004	5605.719272	26.72	100	64.2	72	126	1237.4	1	942	2007-2008	2.993557133
45901	5	5	1	43	4	31914.62945	32584.54046	22.29	85.1	74.9	92	128	741.3	2	5494	2007-2008	-1.833028187
45903	4	4	2	71	3	33663.70102	32723.09964	21.94	81.6	56.1	66	140	977.4	1	1672	2007-2008	-1.883560491
45905	1	1	2	68	1	4865.131732	4935.742687	34.77	111	77.1	58	124	994.6	1	2102	2007-2008	-0.533968694
45907	4	4	2	41	3	27331.88202	27136.41889	28.8	100.7	NA	82	124	474.9	1	2597	2007-2008	0.172087142
45910	2	2	2	55	4	34191.53044	34048.70434	34.36	94.5	79.8	76	136	1433.3	1	1713	2007-2008	2.088074289
45911	1	1	1	54	1	11327.76197	11355.75815	30.35	105.3	77.6	68	114	1054.9	2	1141	2007-2008	2.185631804
45922	1	1	2	63	1	8251.2084	8150.919915	36.57	115.4	89.8	60	138	479.1	1	1108	2007-2008	1.697712792
45925	5	5	1	68	5	55531.60863	57054.87554	24.54	100.2	69.1	66	122	543.9	1	1273	2007-2008	1.00250756
45926	4	4	2	52	3	35130.215	37127.74242	25.96	91.3	64	78	140	699.5	2	1604	2007-2008	3.630428495
45927	3	3	1	45	3	105033.3753	106896.0495	28.69	107.5	102.6	80	116	962.7	1	2576	2007-2008	0.908960772
45928	4	4	1	73	4	9827.240072	10347.73816	23.64	88.9	71.4	108	194	654.2	2	1703	2007-2008	2.361982069
45929	4	4	1	46	4	32909.80916	35574.94491	24.36	92.9	78.3	94	128	520.2	1	3069	2007-2008	-0.915303836
45933	4	4	2	63	3	26034.55895	27138.2772	25.82	92.9	63	78	132	678.4	2	2426	2007-2008	-0.012029772
45943	2	2	1	57	4	26077.33235	28135.66101	25.23	90.5	82.2	86	124	985.5	1	3021	2007-2008	0.015563086
45946	3	3	2	43	5	31640.24104	32245.54182	37.91	119.4	111.5	76	124	592.8	1	689	2007-2008	3.008788303
45949	3	3	1	47	3	27597.241	28753.02852	30.04	106.2	89.8	74	128	1000.1	1	2436	2007-2008	1.321139282
45950	4	4	2	77	3	42808.27597	42307.13691	31.87	100.7	74.7	88	126	776.9	1	3689	2007-2008	2.993669628
45951	3	3	2	58	2	15524.72076	15341.96447	28.21	97.8	69.1	76	124	1241.3	1	1450	2007-2008	0.467016533
45952	3	3	1	52	2	11666.903	11695.73735	31.82	104.3	98.9	100	144	577.3	2	2590	2007-2008	-0.267107823
45957	5	5	2	77	3	37608.39345	37104.92631	29.49	100.7	73.8	68	158	401	1	1313	2007-2008	1.897270782
45959	3	3	2	60	4	9288.964209	9798.257531	33.4	113.5	92.7	84	126	788.3	1	1328	2007-2008	2.838600084
45960	4	4	1	63	4	7750.960967	7851.548119	29.71	105.5	88.2	72	126	445.4	2	3364	2007-2008	-0.340707935
45962	3	3	1	48	3	92720.06258	101728.1212	20.81	90.8	68.7	84	114	888.1	1	4758	2007-2008	-3.040981051
45966	4	4	2	53	4	21630.05297	23025.59545	28.89	96.3	77.9	80	134	965.9	1	3336	2007-2008	0.92871139
45967	1	1	2	40	3	30604.4991	30385.63194	20.44	83.7	56.4	66	104	1116.5	1	534	2007-2008	3.938718061
45968	3	3	2	69	4	11494.14765	11111.65875	37.82	111	91.1	54	164	1461.6	1	769	2007-2008	2.387613403
45970	4	4	2	43	3	97373.94673	99236.781	31.26	110	89.6	88	138	815.5	2	1349	2007-2008	2.831534957
45972	2	3	1	48	3	149088.2949	151732.2442	17.59	75.9	55.8	86	154	944.2	2	4310	2007-2008	0.308217506
45973	1	1	1	53	2	10920.11255	11711.24347	23.54	87.1	63.4	90	142	828.6	2	1935	2007-2008	0.41993494
45974	3	3	2	41	1	21624.14872	21369.59025	29.92	94.4	71.8	70	124	580	2	1770	2007-2008	1.164596878
45987	3	3	1	67	3	52939.84105	51794.69002	42.07	100.7	122.6	72	126	549.9	1	1894	2007-2008	0.644055362
45990	3	3	1	52	3	101584.687	103594.9392	23.43	91.1	74.9	72	126	1227	1	3809	2007-2008	0.790693637
45992	1	1	2	75	3	25065.93963	24365.5693	41.91	134.2	100.3	62	136	995.6	1	937	2007-2008	0.590847207
45995	3	3	2	55	3	90237.94935	93850.39806	37.71	125.7	117.2	66	124	671	1	2189	2007-2008	-2.147750885
45997	1	3	2	58	3	105908.4124	105572.032	30.74	105	83.5	62	114	991.7	1	1725	2007-2008	0.966712997
45998	1	1	1	78	1	10840.50203	11071.20016	33.49	116	83.6	60	148	483.3	1	2700	2007-2008	-1.292920153
46006	5	5	2	74	3	35990.28753	34984.67872	22.33	86.3	57.3	78	114	905.6	1	1181	2007-2008	2.616233121
46009	3	3	1	42	3	33803.52435	33797.09516	22.65	80.6	71.2	74	118	791.9	1	1794	2007-2008	2.988595479
46011	5	4	1	41	3	101958.5018	105554.3466	33.91	123.2	115.3	66	130	1027	2	2568	2007-2008	1.735420776
46017	3	2	2	51	5	107144.1159	111433.3604	40.67	114	92.6	66	106	871.2	1	743	2007-2008	3.436767683
46021	5	5	1	62	1	8605.549653	9279.712566	37.51	118.5	96.5	80	180	820.4	1	1737	2007-2008	-1.910301295
46029	3	3	2	59	2	13738.36182	13943.37092	22.35	85.4	58	78	112	900.1	2	1214	2007-2008	2.403091434
46034	4	3	2	40	3	21355.2989	21202.57713	27.09	92.5	74.1	74	106	1007	1	1277	2007-2008	-0.485484054
46035	5	5	1	74	3	23204.91726	23831.67307	31.26	113.5	95.4	66	128	724.5	1	2811	2007-2008	-1.142400034
46037	2	4	1	69	2	12040.76208	15643.79947	32.37	112.5	94.1	76	158	487.4	1	1402	2007-2008	2.373789402
46043	4	4	2	40	4	26854.47862	27343.5918	63.92	168.4	190.2	72	126	866.9	2	1592	2007-2008	1.964155712
46047	4	4	2	55	1	18454.55483	18237.30867	26.36	95.7	70.3	74	108	766.4	2	2368	2007-2008	-0.818249118
46050	5	5	1	60	3	18456.99169	18226.43458	29.08	99.2	91	78	148	411.4	2	2435	2007-2008	-1.134715619
46059	3	1	2	73	5	37752.25845	36697.41821	23.88	81	67.4	54	150	951	1	2081	2007-2008	2.259545862
46061	4	3	2	41	4	33193.73271	33055.07465	36.2	105.2	92.1	78	128	1077.4	1	1197	2007-2008	1.23705057
46063	2	1	2	53	1	13426.56504	14562.21652	25.95	84	64.3	80	144	524.9	1	1566	2007-2008	1.801661537
46069	3	1	2	74	3	22231.76387	22318.7227	32.57	106.1	89	74	148	586.2	1	1263	2007-2008	1.205672703
46074	1	1	2	61	1	7480.950035	8087.157425	32.15	103.5	82.5	66	130	457.9	1	2149	2007-2008	2.469360939
46085	4	4	1	67	3	53088.2953	51939.93303	27.29	92.5	77.3	96	146	427.8	1	1769	2007-2008	0.723965905
46095	2	2	1	64	1	5468.242642	5716.23061	34.74	114.1	99.7	78	126	797.3	1	2003	2007-2008	0.043099478
46097	1	1	1	74	3	26604.03896	26120.02827	30.49	106.7	90.3	66	154	925.1	1	1554	2007-2008	1.26498599
46098	2	2	1	65	3	21262.07406	21902.07286	25.56	99.2	70.7	86	162	811	1	1087	2007-2008	1.831843421
46101	2	2	1	65	4	6527.944321	6423.846436	32.08	118.4	97.9	74	128	343.4	1	1767	2007-2008	2.756051084
46102	5	5	2	50	3	119055.4749	125825.0485	24.02	82.7	64.3	58	102	650.4	1	2063	2007-2008	-0.654145673
46111	5	5	1	64	4	7237.067591	7073.789537	31.71	108.9	95.9	84	128	962.3	1	1668	2007-2008	1.008548458
46112	3	3	2	76	3	43711.97688	43177.79145	28.8	100.7	NA	68	132	840.3	1	985	2007-2008	1.5105657
46120	5	5	1	61	3	46864.6789	45850.94077	27.53	100.8	84.3	66	130	1056.8	1	2222	2007-2008	-1.984652095
46123	1	1	1	69	3	15165.2658	16829.65474	41.57	129	109.9	72	126	340.2	1	991	2007-2008	2.660437435
46126	2	2	2	65	3	22473.38602	23428.36561	26.8	87.1	60.7	86	160	1531.6	2	1063	2007-2008	2.047900226
46129	2	2	2	64	2	5147.151069	5221.855162	39.68	126.4	94.6	54	170	531.5	1	1805	2007-2008	1.953670227
46132	3	3	1	55	3	102501.546	102688.9629	29.17	102.4	91.4	62	146	1695.4	1	3647	2007-2008	1.583331213
46138	2	1	2	60	3	19711.32137	20298.16481	31.01	105.1	72.3	58	128	594.7	1	758	2007-2008	2.401819734
46140	4	4	1	73	3	8859.280057	8698.10204	33.7	112.7	90.1	76	122	567.4	1	1646	2007-2008	1.136634897
46141	3	3	2	62	2	7294.599204	7724.032785	29.61	94.9	75.6	74	114	1348.2	2	1362	2007-2008	2.323093685
46144	3	3	1	75	3	11018.74247	11031.49385	22.21	88	64.2	74	136	1938.3	1	2402	2007-2008	1.281008679
46148	3	3	2	72	3	27789.5029	30142.19633	27.04	87.5	72.1	90	164	809.7	2	1369	2007-2008	-0.779426992
46158	3	3	1	70	3	34961.87448	35002.33393	26.23	102	79.7	88	180	1178.9	1	1262	2007-2008	2.800660512
46159	3	3	1	72	4	10405.31302	10518.67712	26.81	91.6	72.8	84	146	998	2	2005	2007-2008	-0.290707147
46167	1	1	1	75	3	9935.266183	10270.28658	25.03	102.3	72	64	130	684.2	1	1724	2007-2008	0.119045362
46170	3	3	2	59	3	26268.16744	26184.73594	33.35	107.8	79.4	64	108	913.2	1	1109	2007-2008	1.973980381
46171	3	2	1	78	3	33102.04989	32499.82005	30.79	106.6	80.2	86	136	898.2	1	910	2007-2008	3.672113796
46172	2	2	1	66	3	17290.31078	17810.75757	21.37	89.4	67.1	66	112	738.4	1	1362	2007-2008	2.63518765
46176	2	2	1	72	3	30137.04798	30558.33015	30.86	121.9	108.5	60	104	884.4	1	1974	2007-2008	1.404165705
46180	4	3	2	50	1	16008.82123	15820.36613	39.29	118.6	101.6	104	188	1150.7	2	2307	2007-2008	-0.58064499
46184	4	4	2	58	4	19905.92012	20585.10832	29.02	102.4	79.4	74	150	1077.4	1	1910	2007-2008	2.181250258
46186	3	3	1	48	4	28456.58978	28298.89101	27.17	91.8	78.9	72	126	731.1	2	5438	2007-2008	-2.857034991
46187	1	3	1	56	2	10981.23254	11008.37228	29.76	100	85.6	70	120	1041.5	1	783	2007-2008	3.079217578
46188	3	3	2	59	3	105908.4124	105572.032	29.66	102.9	84.7	66	124	946.2	2	1468	2007-2008	1.160178959
46189	1	1	2	68	3	53935.50777	60780.72562	36.01	106.6	77.5	52	118	1020.8	1	1803	2007-2008	1.648147485
46190	4	4	2	56	2	14000.79352	14209.71873	27.47	94	66.5	70	120	497.7	2	1349	2007-2008	0.051526031
46193	5	5	2	57	3	94583.35604	94282.94564	24.01	77.1	64.9	80	118	896.1	1	3106	2007-2008	-3.429334482
46194	3	3	2	75	3	43814.1208	43696.7286	27.31	95.3	66.8	70	110	969.2	1	1620	2007-2008	0.486952486
46195	5	5	2	45	3	135251.5836	139106.478	24.07	83.5	56.2	72	98	742.6	2	1657	2007-2008	2.305810248
46196	4	4	1	79	3	30137.04798	29588.7608	25.95	110.2	93.1	0	136	1072.6	1	1694	2007-2008	-0.996551637
46201	5	3	2	50	1	19341.79304	19630.41869	31.64	100	77.8	74	100	552.9	1	1513	2007-2008	0.300730402
46202	4	4	1	45	4	26885.34747	29007.45415	32.79	101.3	93.1	70	120	932.8	1	2176	2007-2008	2.720530177
46210	3	3	1	77	3	9471.568094	9299.250643	31.57	128.9	89.2	52	116	1003.3	1	1575	2007-2008	1.843014814
46217	4	4	2	55	1	16965.19077	17218.35185	34.29	109.9	82.7	90	130	1773.7	1	1380	2007-2008	2.469526019
46218	5	5	1	66	3	49517.55331	50676.92138	28.33	103	97.5	80	120	557.1	1	2465	2007-2008	0.190217813
46221	3	3	1	55	3	24155.22992	25217.67622	37.14	118.1	114	78	118	736.5	1	2391	2007-2008	0.273533329
46228	4	4	2	70	3	32310.45526	31701.06483	27.76	106.3	75.3	50	124	1570.9	1	1281	2007-2008	2.462576114
46232	3	3	1	58	2	17560.19321	18832.37897	35.4	119.7	107.8	80	128	620.7	1	2693	2007-2008	3.244137681
46238	1	4	2	56	3	29941.78607	30103.00281	17.91	70.8	41.1	76	124	967.5	1	1041	2007-2008	3.329506702
46239	3	5	2	61	3	65649.87432	66694.44334	21.61	85.5	58.4	56	148	689.8	1	1586	2007-2008	1.117641452
46243	4	4	1	62	3	49593.47222	48520.70708	21.72	91	76.2	76	112	1068.7	2	1892	2007-2008	0.656082195
46245	4	3	1	53	3	77488.44326	79128.03375	31.44	119	106.8	58	108	660.6	2	2422	2007-2008	2.553058819
46249	4	4	1	76	3	35596.10349	34948.49902	25.82	101.6	90.3	64	124	1398.4	1	1191	2007-2008	3.278316414
46255	2	2	1	75	3	9935.266183	10270.28658	28.8	100.7	NA	66	138	512.6	1	1059	2007-2008	4.156717542
46258	1	1	2	62	1	5561.824472	5494.223834	28.1	94.9	62.3	80	132	631.8	1	1392	2007-2008	1.27999535
46261	1	1	2	57	1	11754.30657	11615.93542	29.38	98	67	88	140	336.3	2	1612	2007-2008	2.262103161
46269	1	1	1	50	1	10920.11255	11989.84485	26.92	97	76.7	68	126	976	2	571	2007-2008	2.48863645
46275	3	3	2	73	4	15412.60203	15569.43169	29.36	95.2	76.3	52	146	706.4	1	639	2007-2008	3.454176519
46281	5	5	1	70	4	12084.86642	12874.88841	34.01	120.7	98.4	66	120	896.1	1	1277	2007-2008	1.876451537
46282	5	5	1	60	4	6029.157126	6016.234496	23.44	84	66.8	76	100	361.1	2	2105	2007-2008	-1.440751681
46288	4	1	1	46	3	28087.57217	30686.10011	39.93	128.6	128.8	80	140	537.4	1	2522	2007-2008	-2.923365986
46313	3	3	1	40	1	23561.09053	24686.74718	32.1	102	87.5	76	134	926.7	2	4476	2007-2008	-1.590336401
46315	4	1	2	76	3	38696.06491	39501.10816	32.55	110.5	84.8	98	184	517.2	1	1806	2007-2008	-0.796625607
46317	2	2	2	71	4	11531.03713	12507.69265	35.63	117.5	77.2	68	126	1062.8	1	816	2007-2008	3.590555438
46320	3	4	2	45	4	24765.18392	25268.75556	31.33	93.6	80.2	68	124	2110	1	1346	2007-2008	2.116458554
46334	4	4	2	75	1	9634.105961	12455.38632	30.29	105.4	67.7	86	158	1172.8	1	1833	2007-2008	1.493417456
46335	1	3	1	42	2	23869.57889	23928.57174	37.89	122.5	105.3	72	106	1429.6	1	2847	2007-2008	0.317741522
46337	4	4	2	70	3	35990.28753	34984.67872	24.06	87	71.6	74	128	892.5	1	1215	2007-2008	1.603052136
46340	5	5	1	73	5	31729.69159	32970.69587	28.8	100.7	NA	72	126	747.1	1	2972	2007-2008	-2.804384236
46343	2	2	2	65	4	11494.14765	11226.48663	42.52	124	114.5	54	144	510.6	1	1429	2007-2008	1.304375129
46345	4	5	2	59	1	16965.19077	16765.47734	26.89	80.4	65.2	76	122	768.7	1	486	2007-2008	4.12161876
46346	3	3	1	75	3	26604.03896	26975.93362	25.87	101.3	87.6	56	120	1330.8	1	1842	2007-2008	2.547367611
46348	2	4	1	58	4	22436.10665	22311.77178	40.6	133.1	128.5	84	140	1461.3	1	2320	2007-2008	1.96682905
46354	1	1	2	42	1	15022.25886	15516.32538	30.59	100.7	75.7	84	106	1113.6	2	1055	2007-2008	3.653282519
46357	5	3	2	45	2	20857.91336	21169.16313	26.31	87.4	67.6	78	118	1477.4	2	990	2007-2008	0.770277137
46359	1	NA	1	74	3	25749.8736	26429.91942	28.8	100.7	NA	60	170	538.4	1	1592	2007-2008	2.012306427
46360	3	3	2	48	3	92858.75091	92841.32917	37.84	108.3	95.9	66	108	928.6	1	2059	2007-2008	2.797547526
46363	3	3	2	63	3	24774.24183	25061.99131	21.57	88.8	62.2	80	182	522.4	1	811	2007-2008	2.820563351
46364	2	2	1	68	4	6554.890326	7200.112969	29.64	103.5	91.6	72	126	565.4	1	2597	2007-2008	1.31465161
46367	4	4	1	53	4	20422.84537	21503.09482	63.92	159	186.9	76	114	851	1	2425	2007-2008	0.775083897
46368	5	5	2	68	2	10138.94889	10413.39555	33.52	108	93.7	70	110	1462.8	1	997	2007-2008	0.703432862
46372	4	5	2	62	3	50901.31574	53863.26206	24.24	89	74.4	72	126	735.4	1	1305	2007-2008	1.703551363
46375	4	2	1	49	3	94759.283	94741.26046	29.26	107	98.1	80	128	586	1	3392	2007-2008	0.946314138
46379	4	3	2	49	4	25638.92165	25531.82182	24.2	79.4	63.6	78	132	729.7	2	2934	2007-2008	-1.292958414
46384	2	2	1	54	4	20000.25749	19889.42144	20.7	74	60.4	78	136	1355.8	2	2227	2007-2008	0.345433284
46385	2	2	1	42	3	57669.44783	60205.09157	28.72	104.2	105.1	86	130	861.5	1	2535	2007-2008	-0.388716424
46386	5	5	1	51	3	92508.104	94338.74038	26.25	95.1	91.4	84	146	1036.6	1	4268	2007-2008	-1.874481941
46389	5	2	1	79	3	28153.11442	27640.9212	24.27	104.6	76.2	50	114	577.3	1	1456	2007-2008	-2.59616536
46392	1	1	1	69	2	7297.431562	8079.50651	23.94	100	67.1	60	166	777.6	1	969	2007-2008	3.349684408
46394	4	4	1	66	3	40876.91339	41833.97579	33.51	118.9	101.7	72	142	463.6	1	3436	2007-2008	-1.573020532
46397	2	2	2	58	4	21262.5998	23050.20245	27.12	93.1	65.4	72	126	858.7	2	1816	2007-2008	2.345336945
46405	3	3	2	61	3	22354.43662	24675.06859	36.91	125.7	115.1	60	146	922.8	1	1319	2007-2008	1.193224496
46406	3	3	1	76	3	27231.53194	27170.13428	25.46	97.8	72.2	74	134	666.1	1	2356	2007-2008	0.456725139
46408	2	5	1	56	1	15898.41705	17050.21189	27.29	105	81.1	70	138	835.9	1	4105	2007-2008	0.043191169
46410	2	2	2	54	4	21711.85987	22452.66656	27.53	94.2	69.6	64	94	670.2	2	3212	2007-2008	1.062977026
46412	1	4	2	68	5	19645.01266	20229.88196	34	112.8	90.9	56	122	689.7	1	790	2007-2008	3.09803527
46419	2	2	2	72	1	10626.05894	12749.52363	30.12	98.7	69.4	54	180	898.3	1	754	2007-2008	1.905573089
46420	1	1	1	73	1	5754.008811	5876.460616	31.29	111.7	79.5	54	108	1207.1	1	2140	2007-2008	1.073679885
46425	5	5	1	50	4	22436.10665	22311.77178	28.83	100	97.5	80	124	466.4	2	4035	2007-2008	-2.657638042
46428	3	3	1	71	4	10235.68877	10303.44593	34.23	118.7	109.3	60	110	873.8	1	2180	2007-2008	2.901969307
46432	3	3	1	48	4	28602.06	29202.43779	31.27	105.3	91	76	116	531.9	2	4626	2007-2008	-2.641905389
46433	3	3	2	42	2	15609.97942	15642.99012	32.65	99.7	72.4	82	120	951	2	1466	2007-2008	0.266950599
46436	2	1	1	46	4	26885.34747	29007.45415	29.06	104.2	89.1	76	112	660.6	1	2810	2007-2008	0.112128165
46440	4	4	2	48	2	20857.91336	20612.37497	20.92	76	49.8	78	130	782.9	1	1821	2007-2008	2.086604079
46442	4	4	2	66	2	4923.361892	4777.76733	32.13	99.2	77.4	60	96	499.4	1	931	2007-2008	2.274931868
46447	1	2	2	65	1	4849.546812	5113.985383	23.15	91	55.2	80	140	1253	1	636	2007-2008	3.213402277
46449	2	2	1	51	4	23747.32497	23615.72368	39.97	126.7	132.4	82	114	1060.5	1	1937	2007-2008	2.970603917
46451	3	4	2	75	3	31872.9338	31113.95112	30.01	99	67.8	78	158	924.3	1	1310	2007-2008	1.416030899
46452	3	3	1	67	3	16702.87673	16410.97681	24.86	92	68	74	154	683.6	2	1093	2007-2008	1.536528183
46457	4	4	1	43	3	116710.0803	120766.6669	25.28	96.2	78.3	90	124	805.6	1	3241	2007-2008	-0.719338593
46458	4	5	1	61	4	5603.772325	6081.057146	23.55	98.8	74.7	66	128	673	1	1546	2007-2008	0.812980047
46461	4	3	2	48	4	24764.43774	26846.44911	36.3	101	87.1	86	148	726.3	2	1767	2007-2008	0.20016341
46464	4	4	1	72	3	30052.77379	29781.65506	24.9	105.2	83.4	64	104	575.1	1	2653	2007-2008	-1.779073123
46465	3	3	1	72	1	6077.295347	6196.171939	24.53	95.3	61.7	74	180	738.8	1	1869	2007-2008	0.198974261
46468	2	3	2	60	4	10882.70737	10629.28479	24.51	92	59.5	74	162	690	2	488	2007-2008	3.963328983
46470	3	3	1	66	3	64448.29287	64692.84828	29.06	110.9	83.5	74	112	653.3	1	2501	2007-2008	0.763370471
46475	4	4	1	60	4	8511.4591	8621.915524	27.43	96.8	76.5	56	136	609	1	3666	2007-2008	-1.059723446
46476	1	1	2	73	1	10626.05894	12749.52363	27.59	101	61	48	160	522.2	1	1086	2007-2008	2.782841676
46477	4	4	1	68	3	54622.64844	68146.55556	38.18	122	107.5	0	132	539.6	1	1275	2007-2008	2.521678003
46481	5	5	1	75	3	27388.78317	28128.54357	26.64	100.7	86.8	70	106	883.9	1	1657	2007-2008	-0.665845222
46484	3	3	2	54	3	100674.0063	101729.7969	40.66	124.4	131.9	72	126	639.1	1	1987	2007-2008	2.90183907
46485	2	3	2	53	2	11447.17257	11614.81534	32.55	110.7	77.6	78	118	880.2	2	1740	2007-2008	2.352032771
46486	4	4	1	49	2	21526.50928	23635.24232	29.55	102.9	95.2	78	112	1343.9	1	2527	2007-2008	-1.717163593
46490	3	3	1	53	3	21572.24964	22521.08584	25.36	89.8	72.1	66	120	640.4	2	5036	2007-2008	-3.809378739
46491	2	2	1	78	3	31035.46855	31071.38419	23.38	100.7	67.4	52	124	1128.9	1	1520	2007-2008	-0.850720949
46492	5	5	2	66	3	59356.35643	70522.67704	28.49	98.6	78.7	58	136	386.1	1	601	2007-2008	2.767496082
46493	3	3	2	66	4	9852.944589	10489.62303	29.86	98	81.1	44	132	707.2	1	1863	2007-2008	0.264533955
46495	4	3	2	75	3	33345.31626	33905.94515	26.34	99	68.2	66	124	396.7	1	1457	2007-2008	1.590089462
46496	4	3	2	63	4	11172.51228	13772.77697	42.03	123.8	108.4	68	180	638.8	1	348	2007-2008	1.782267912
46497	2	2	1	64	4	7237.067591	7080.744171	29.87	103.2	85.4	72	170	560.3	1	1636	2007-2008	1.791609207
46501	2	2	2	74	3	42969.40373	45575.48908	30.74	119.7	83.8	66	132	596.5	1	1366	2007-2008	2.783029346
46504	3	4	2	42	2	22016.68632	22345.22775	26.82	83.2	72.3	74	112	874.7	2	2103	2007-2008	-0.035989917
46509	4	4	1	56	4	18792.61119	19187.0816	33.41	113.5	106.2	64	124	554	1	1189	2007-2008	-1.594993137
46514	3	1	2	61	3	63818.81276	66675.57423	25.05	87.6	63.5	80	128	460.1	1	1560	2007-2008	0.025081982
46522	4	4	2	61	3	84302.95711	87876.92633	31.09	106.3	79.4	82	156	844	2	1541	2007-2008	0.610650204
46523	4	4	1	50	3	86053.45943	86210.80218	48.56	145.4	141.5	76	178	716.1	1	1806	2007-2008	0.978025453
46526	4	4	2	55	3	95352.03813	95049.18628	24.39	95.7	66	82	120	547.4	1	2000	2007-2008	-0.226910477
46528	4	4	1	76	3	28153.11442	29027.01756	28.12	112	97.8	80	122	658.5	1	1689	2007-2008	1.814474876
46531	2	2	1	69	4	7043.120456	6890.986368	38.38	130.5	112.5	80	132	1085.7	1	1120	2007-2008	3.641056256
46532	4	4	1	40	3	28087.57217	28416.35196	28.57	99.7	87.2	82	136	458.7	2	2112	2007-2008	3.832206428
46536	2	2	2	79	3	31860.18762	30969.97841	30.96	103.6	76.7	50	136	1017.5	1	881	2007-2008	3.136895006
46537	5	5	1	59	2	16143.00808	17724.3743	30.77	107	90.7	74	122	1335.6	2	2445	2007-2008	-3.330418941
46547	3	3	1	74	3	30052.77379	34654.28823	29.22	113.4	90	70	130	472.6	1	1312	2007-2008	2.624753102
46554	5	4	1	48	3	107335.6429	119313.6231	28.12	100.7	101.3	92	124	885.9	1	2110	2007-2008	3.416044625
46559	4	4	2	71	3	20637.79093	22480.35052	38.58	128.9	98.9	42	106	465.5	1	1391	2007-2008	-0.246816745
46562	2	2	1	70	2	7153.392031	7293.317905	29.85	100.4	76.8	80	130	864.3	1	1313	2007-2008	2.819993498
46563	5	5	1	60	3	40868.48014	41825.34509	31.72	106.8	88.9	64	96	967.2	1	2580	2007-2008	0.576501983
46564	1	4	2	65	1	7280.467062	7870.42862	23.91	91.5	63.6	72	126	899.5	1	1192	2007-2008	2.954173386
46565	5	4	2	42	4	21615.82851	21872.87901	21.53	77.5	64.2	72	126	2950.2	2	2661	2007-2008	-0.175490961
46566	3	5	2	48	2	22291.90488	22624.55323	23.17	86.4	59.9	78	122	868.5	1	1836	2007-2008	-2.873846991
46569	3	3	2	63	3	21576.59974	27833.43187	31.63	110.1	75.7	70	136	615.5	1	732	2007-2008	3.157981657
46570	2	2	1	61	4	7444.157754	7428.910957	29.1	109.3	92.2	82	134	588.1	1	2048	2007-2008	1.319793024
46571	3	3	2	61	1	7277.593295	7176.594714	25.71	97.7	66.8	78	140	1339.5	1	2287	2007-2008	-0.260176004
46575	3	3	2	62	3	53715.24902	59291.47205	27.28	96.2	69.4	62	140	719	1	2601	2007-2008	-1.470803689
46577	5	5	1	62	3	47908.54622	48298.36672	22.67	93.4	74.2	68	118	541.9	1	2763	2007-2008	-2.522720816
46578	2	2	1	72	4	10220.01972	10555.02844	24.14	97.4	69.2	66	140	799.2	1	1742	2007-2008	2.349925003
46580	3	4	2	58	3	96663.55644	96356.53903	41.47	123.1	111.4	80	118	534.4	2	3143	2007-2008	2.191124717
46589	1	1	1	69	4	5758.083982	5905.351154	26.42	99.1	83.6	70	142	1215.8	1	616	2007-2008	3.593989418
46590	NA	3	2	74	1	6620.259379	7436.842747	21.89	84.3	51.1	64	166	860.6	1	2165	2007-2008	0.071092843
46591	5	5	1	53	1	15232.987	16759.55488	27.52	110	80	72	120	1657.9	1	862	2007-2008	3.306391222
46594	3	2	2	60	4	9037.014557	8963.329353	28.36	104.8	81.1	68	148	1397.9	1	2177	2007-2008	1.541459579
46596	3	3	1	44	1	21123.01512	23192.22195	26.21	98.1	75.2	86	120	1313.1	2	1372	2007-2008	2.555812951
46597	2	4	1	45	2	21392.04306	22151.32216	34.76	115.5	101.4	78	112	453.1	1	2242	2007-2008	-1.684094606
46599	2	2	2	59	2	14000.79352	13835.97683	24.3	95.6	62.2	74	128	592.6	1	1084	2007-2008	3.719670189
46600	5	5	2	47	3	129047.3825	133678.2268	26.87	100	78.2	70	118	851	1	1226	2007-2008	4.184280008
46603	3	3	2	73	3	35990.28753	41088.87431	30.93	106.3	72.4	56	140	971.6	1	508	2007-2008	3.952366977
46609	4	4	2	61	3	55519.27405	57872.97769	23.23	84.1	62.1	74	138	625	1	2733	2007-2008	0.873078144
46619	3	3	1	79	3	35880.50719	35377.34131	27.97	106.8	81.6	50	162	653.1	1	1367	2007-2008	1.915001263
46625	4	4	2	51	4	20877.42148	21246.97885	21.36	78.2	55.5	78	128	715.7	2	1779	2007-2008	0.191430761
46627	1	2	2	73	1	8080.104614	9076.754241	27.43	92.2	66.5	64	126	595.4	2	1058	2007-2008	0.666124239
46634	4	4	2	63	3	22354.43662	28836.82769	25.15	97.6	69.4	70	134	917.3	1	1528	2007-2008	-0.722585715
46636	4	4	2	76	3	34226.76835	33270.43424	35.57	119.2	87.8	64	146	1000.6	1	1307	2007-2008	-0.976044894
46642	1	2	1	61	1	8605.549653	10176.57327	23.22	83.6	70.3	86	142	1373.5	1	1698	2007-2008	0.210734285
46649	5	5	2	42	3	80591.33243	80702.13542	22.09	76.1	63.1	72	108	791.3	2	1508	2007-2008	2.023637517
46651	4	4	2	59	2	16008.82123	15820.36613	28.8	100.7	NA	54	142	822.1	1	1035	2007-2008	3.911380033
46656	1	1	1	70	3	11265.8589	11060.89768	24.89	102.6	75.7	74	132	483.4	1	2051	2007-2008	1.694699526
46657	3	2	1	74	3	28153.11442	28102.55699	37.77	127.3	105.6	80	136	1128.6	1	1103	2007-2008	1.197164745
46659	3	3	2	48	3	26552.13605	26723.59398	32.38	102.4	85.4	68	104	510.4	1	1175	2007-2008	4.204070497
46663	3	3	1	46	3	24678.62333	24673.92963	27.19	92.5	78.2	72	124	1125.1	2	1553	2007-2008	4.220050851
46664	4	3	1	47	3	72445.23626	72431.45769	22.43	87	72.2	74	124	1135.6	2	907	2007-2008	2.11939877
46665	5	5	1	57	3	66478.66305	68928.20176	23.97	88.6	80.9	74	134	484.6	2	2945	2007-2008	-1.494719187
46666	4	4	1	50	3	63806.11334	63922.77837	31.89	113.6	103.9	0	122	583.6	1	1735	2007-2008	1.974688995
46674	1	4	2	69	2	7055.055869	7946.336064	31.08	108.6	71.9	66	134	1052.5	1	738	2007-2008	0.923525404
46682	4	4	2	51	3	26737.1021	28257.39153	29.97	102.6	85	72	122	1074.9	2	716	2007-2008	3.840662763
46688	3	3	1	66	3	46864.6789	45850.94077	34.06	129	119.5	62	150	1219.2	1	2539	2007-2008	-2.649799113
46691	1	1	2	40	1	15609.97942	15642.99012	34.98	94	78.8	76	102	774.2	2	930	2007-2008	2.386400162
46692	3	4	1	78	3	30137.04798	32585.05768	26.14	105.9	86.4	74	168	755.5	1	1654	2007-2008	-0.1522322
46704	3	3	1	59	4	21097.15018	21246.8262	35.16	117.2	102.2	74	122	1221.4	1	637	2007-2008	3.480956808
46710	1	1	1	60	1	5213.785684	6025.532935	32.87	113.8	93.1	76	118	1203.8	1	3039	2007-2008	0.089129664
46713	3	3	2	51	3	95352.03813	95049.18628	33.06	113.3	97	78	118	634.9	1	2336	2007-2008	1.66193705
46716	5	5	2	52	4	44567.87248	45097.86345	30.97	106.9	82.8	76	122	627.8	1	894	2007-2008	1.863066097
46717	4	4	2	49	2	29445.3599	29098.73049	31.8	96	76.9	82	132	636.4	1	961	2007-2008	1.400484344
46722	4	4	1	52	4	18724.12272	19714.51964	23.97	85.3	78.7	68	108	917	2	3722	2007-2008	-1.225486771
46731	3	4	2	62	1	7027.280799	6930.174783	36.64	128.1	90.2	76	156	521.8	1	464	2007-2008	3.339428808
46732	1	1	1	77	2	6468.351302	6784.342159	26.49	95.6	72.2	58	162	753.9	1	2638	2007-2008	-0.297809488
46740	5	5	2	44	1	25274.17312	24976.64673	32.22	101.7	77.2	76	130	858.3	2	1368	2007-2008	1.185489324
46750	1	1	1	45	1	14685.35251	14950.79529	29.37	101.3	88.1	62	136	905	2	2476	2007-2008	-0.415032269
46753	5	5	1	59	1	17560.19321	18832.37897	22.67	95	73.3	72	126	990	1	1872	2007-2008	0.064551604
46761	4	4	2	65	4	13053.22083	13002.79322	27.17	100.3	78.8	72	126	700.1	2	1135	2007-2008	2.448828332
46764	4	4	2	64	4	11630.61	14337.4913	18.47	76.8	39.8	76	138	1184.4	1	1019	2007-2008	1.921562022
46768	5	5	2	59	3	96663.55644	96356.53903	26.57	95	71.9	64	128	1342.9	2	1771	2007-2008	-3.10635586
46770	4	4	2	70	3	26899.31618	26539.21248	28.87	99	67.5	74	108	823.4	1	2170	2007-2008	0.510996589
46776	3	3	2	73	3	35990.28753	34984.67872	22.06	77	56.2	70	124	558.1	1	1984	2007-2008	1.001767916
46777	4	NA	2	45	4	23833.86139	24647.07059	30	92	74.6	86	134	630.4	2	1729	2007-2008	0.513172162
46778	1	1	1	73	3	11057.11829	11496.99784	26.9	99	84	68	124	436.2	1	2239	2007-2008	0.722372252
46781	2	2	2	71	4	17997.44042	18180.5719	29.79	94	70.2	50	116	791.6	1	1499	2007-2008	3.448907647
46784	2	3	2	41	1	23128.20913	22855.94493	31.27	103.1	71.2	82	168	956.5	2	1715	2007-2008	1.981404255
46794	4	4	2	51	3	35625.03859	35511.88833	33.98	108	80.7	84	128	660.7	1	514	2007-2008	3.6047173
46800	5	5	1	68	3	49330.97891	50485.97866	31.69	114.5	108.7	96	134	632.3	1	1775	2007-2008	1.492004715
46804	5	5	2	40	4	24997.06453	25849.96211	41.72	136	116.2	78	112	926.5	2	2732	2007-2008	-0.090397544
46807	2	4	1	66	3	19043.6871	20518.48823	26.72	110.7	79.6	66	122	1128.6	1	747	2007-2008	3.05388651
46812	5	5	2	58	3	87778.70553	91292.70461	33.33	108	91.5	66	128	836.9	1	1146	2007-2008	1.827627298
46819	1	1	2	58	1	16965.19077	16765.47734	41.17	134.8	105.8	48	142	1211	1	875	2007-2008	2.757040915
46823	4	4	2	52	3	32545.35721	33172.9104	35.5	106.7	91.8	66	96	553.9	1	1618	2007-2008	0.837931673
46825	3	3	2	55	4	20877.42148	22224.40517	28.19	94.9	74.8	64	106	1056.1	1	2372	2007-2008	3.005863623
46828	3	2	1	72	3	8967.720532	11227.33507	32.23	106.7	84.9	80	132	685.9	1	1833	2007-2008	1.597036437
46830	2	2	2	62	4	11318.91974	12700.19351	39.78	113.4	96.8	64	122	780.3	1	1782	2007-2008	1.246317157
46835	3	3	1	49	4	41292.30663	44551.57937	25.28	92.5	71.7	60	100	1293.3	2	1778	2007-2008	-0.238000866
46836	5	5	2	53	3	110262.0069	109911.7989	28.96	89.8	70.2	72	126	582.1	2	2597	2007-2008	0.278958936
46838	5	5	1	75	3	30052.77379	29506.01983	28.11	105.5	96.2	72	130	644.5	1	919	2007-2008	0.036688589
46839	1	1	1	42	2	17914.46109	18473.25135	24.1	86.9	63.4	74	112	625.2	2	693	2007-2008	3.365867764
46840	4	4	2	61	4	8592.289113	10388.15177	35.18	119.6	101.9	68	128	907	1	984	2007-2008	3.0266369
46841	3	3	2	49	2	23128.20913	22855.94493	26.13	83.7	60.3	58	120	543.7	1	1757	2007-2008	1.182245102
46843	1	1	1	54	1	9300.985806	9591.103396	29.06	100.4	93.1	62	134	812.7	1	2429	2007-2008	1.412488556
46846	1	1	2	78	3	10395.61245	10980.89514	25.02	94	59.5	78	152	745.2	2	1314	2007-2008	-0.45492998
46851	1	1	2	54	2	15524.72076	15341.96447	32.75	111.7	79.9	82	126	729.7	1	1889	2007-2008	2.338867699
46853	2	2	1	61	3	53088.2953	51939.93303	35.1	118	115	80	120	878.2	1	2507	2007-2008	-0.03582794
46854	4	4	2	45	3	92244.05272	95189.46918	37.13	118.6	101.7	66	118	1476	2	5182	2007-2008	-0.503462138
46856	3	3	1	44	4	28456.58978	30702.71732	33.18	112.7	101.5	72	126	620.7	2	2515	2007-2008	1.888181403
46857	2	1	2	72	3	41869.27714	41119.99046	28.32	105.1	73.6	56	132	967.3	1	1185	2007-2008	3.941502055
46859	3	3	1	48	3	28803.80468	31602.18892	31.55	116.2	91.3	72	126	656	1	2098	2007-2008	2.072915552
46861	5	5	2	63	3	55519.27405	62937.03476	24.06	84.5	65.9	70	124	1038.9	1	1266	2007-2008	1.995228077
46862	4	4	1	50	3	63806.11334	63922.77837	24.37	94.5	83.5	80	124	611.7	1	2500	2007-2008	1.019382337
46864	4	5	2	46	3	79169.18009	79538.22115	22.41	84.4	65.9	72	126	647.4	1	1191	2007-2008	3.56131015
46867	3	2	1	72	4	13270.59273	13575.29854	30.21	107	93.9	80	168	764.7	1	1213	2007-2008	2.759126392
46876	3	2	2	61	2	7294.599204	7262.847426	27.53	95.3	65.8	60	114	1008.9	1	954	2007-2008	2.087725077
46883	2	4	2	55	1	10757.62256	10630.98433	26.92	101.3	71	80	124	870.9	2	1035	2007-2008	1.536853119
46885	1	1	2	70	1	9121.612069	10504.27319	37.02	121.9	92.3	52	146	756.1	1	561	2007-2008	3.164444071
46888	5	5	2	52	3	84879.68083	85616.77997	23.95	90	67.6	76	106	590.2	1	1883	2007-2008	2.042289429
46891	2	3	1	41	3	31673.75742	32790.81892	28.21	102.6	85.6	80	128	581.4	1	3366	2007-2008	2.204139612
46896	3	1	2	45	2	17358.05246	17153.71428	38.49	105.3	93.2	94	136	646.8	2	1290	2007-2008	1.290918054
46899	5	5	1	56	1	10622.50806	11392.07838	30.24	108.3	100.5	76	126	678.1	1	2090	2007-2008	1.547262144
46900	2	2	1	54	3	72231.70512	80454.41821	27.78	102.8	89.2	62	120	1090.2	2	1523	2007-2008	3.376813735
46901	3	3	1	40	2	16596.32699	17559.00133	26.55	99.2	80.2	76	108	713.9	2	1817	2007-2008	1.840501305
46905	3	2	1	41	2	14099.71387	14917.5715	27.02	100.7	81.7	78	120	1019.1	2	4396	2007-2008	-1.902164963
46906	4	4	1	52	1	15232.987	15708.13637	36.51	123.4	125.1	70	108	908	1	2975	2007-2008	1.314440158
46907	1	1	1	58	2	14772.34746	15296.6702	27.1	101	72	70	124	712.5	1	1270	2007-2008	2.787322029
46909	4	4	1	68	3	81571.68296	79807.19151	33.02	117.3	112.4	68	90	814.9	1	2289	2007-2008	-0.53935625
46911	3	3	2	77	3	33715.31325	33847.18962	21.05	80.7	49.2	74	118	1671.6	1	649	2007-2008	3.307841092
46914	3	3	1	44	2	16958.26732	17000.17909	27.49	93.3	75.3	102	146	900.6	1	2097	2007-2008	-1.274328978
46916	2	2	2	75	4	13104.92612	13027.58664	34.7	105.6	83.8	66	130	371	1	3030	2007-2008	2.288738616
46918	4	5	1	40	1	23121.2265	25438.31124	45.85	142.2	134.7	92	126	1113.7	1	2304	2007-2008	-2.804125678
46922	1	1	2	52	2	10478.1382	10354.79005	25.44	83.4	62.3	54	108	1104.7	1	2260	2007-2008	0.717647526
46926	3	3	1	73	2	9561.358904	9748.386471	27.46	95.2	71.9	74	134	1229.6	1	2051	2007-2008	0.954771809
46927	4	4	1	61	3	40876.91339	39992.69768	36.5	123.1	106.1	76	134	823	1	3241	2007-2008	-1.936793698
46928	3	3	2	79	4	13659.34849	13798.33806	25.14	77.2	58	46	140	670.4	1	1622	2007-2008	3.168148617
46933	2	2	1	62	4	6527.944321	6424.23459	22.61	89.9	67.6	70	124	564.6	1	1777	2007-2008	-0.456473518
46934	4	4	2	49	5	105878.3535	111452.4162	18.98	83.4	58.6	76	128	324.3	1	1797	2007-2008	2.504580503
46936	3	3	1	75	2	6468.351302	6658.176784	22.08	89.1	57.6	52	136	921.8	1	1326	2007-2008	1.461189704
46940	1	2	1	62	1	6344.364727	7332.134638	26.33	110.8	75.1	80	168	822.9	1	724	2007-2008	3.42440748
46941	4	4	1	51	5	18325.0903	18658.69377	22.14	84.3	56.9	82	116	738.1	2	3442	2007-2008	-0.041997178
46951	1	1	1	78	3	34961.87448	34325.80861	15.25	70.5	47.2	54	112	566.9	1	1503	2007-2008	2.103941669
46954	4	3	2	54	4	36633.78261	39713.681	37.11	112.3	96.9	74	144	831.3	2	1324	2007-2008	2.835077502
46955	2	2	1	55	3	102792.3573	104663.6653	24.54	92.4	88.6	62	92	589.9	1	551	2007-2008	2.490361166
46957	5	5	2	42	3	107369.6939	106601.8427	21.25	73.4	49.3	64	114	1129.1	2	2304	2007-2008	-0.870264663
46961	1	3	2	74	3	43814.1208	48309.13371	36.15	118.6	88.2	56	144	858.7	1	1277	2007-2008	1.978379314
46969	4	4	1	45	5	116710.0803	120766.6669	37.1	115.5	104.2	110	162	524.4	1	2471	2007-2008	1.849772153
46971	5	5	2	67	3	62024.9895	64654.49873	24.94	83.2	56.8	70	132	565.7	1	2136	2007-2008	-1.364552441
46972	3	3	2	66	3	59356.35643	60045.7725	22.1	90	59	92	142	1377.8	1	1162	2007-2008	2.733550313
46975	1	1	1	68	2	9047.812863	10017.47838	25.03	100	66.5	64	170	624.2	1	2024	2007-2008	2.186274719
46983	3	3	1	70	3	31035.46855	31071.38419	31	112	97.9	62	114	934.1	1	1293	2007-2008	2.187599611
46985	2	2	1	49	4	24472.84204	25767.3127	20.17	71.7	56.8	100	140	841.4	2	1957	2007-2008	2.845891872
46987	1	1	1	56	2	10981.23254	11008.37228	30.78	105.7	83.7	80	138	775.1	1	3248	2007-2008	2.422341386
46990	5	4	2	54	4	21413.49729	21324.04806	32.52	102.6	94.2	72	124	1112.5	1	911	2007-2008	0.215218485
46992	4	4	1	61	2	6079.829507	6252.43686	34.49	122.2	101.2	82	108	752.4	1	2329	2007-2008	2.083838098
46995	5	5	2	79	3	35990.28753	41088.87431	26.87	92.5	58.7	72	128	737.4	1	1407	2007-2008	-3.106468223
46996	4	4	2	77	3	24623.90226	26822.34528	30.87	106.2	71.5	70	124	793.2	1	1573	2007-2008	1.465767545
46997	2	5	2	41	2	26571.39754	26258.60029	28.62	89.9	70	80	124	386.5	2	1417	2007-2008	2.256681874
47002	3	1	1	42	3	30901.63116	32195.80834	31.1	114.3	103.7	90	130	684.8	1	3614	2007-2008	1.572180744
47005	1	1	1	53	3	25211.30734	27716.51575	33.97	129.7	103.9	76	132	569.9	1	2723	2007-2008	0.270903993
47010	3	2	2	62	2	5134.086588	6353.235827	32.41	100.7	80	64	136	949.1	1	774	2007-2008	2.375187517
47012	5	5	2	61	3	45831.35485	48498.28026	24.28	90.4	70	86	140	1666.1	1	3178	2007-2008	-1.40384937
47014	4	4	1	61	4	5057.979664	5123.618979	31.36	110	98.7	76	138	791.9	1	2323	2007-2008	0.348777338
47024	1	4	2	68	3	25164.265	26802.57006	29.79	95.2	72.4	64	148	680.3	1	1741	2007-2008	-1.226507576
47025	4	5	2	57	3	25901.2431	26938.13404	21.26	77.3	58.8	80	148	1096.7	1	1619	2007-2008	0.336749362
47031	4	4	2	50	3	92580.28388	92286.23553	22.01	72.5	59.5	62	102	3178.5	1	1940	2007-2008	-3.90429001
47042	4	4	2	54	3	30810.33824	32562.23459	24.02	82.7	65.8	78	128	1191.7	2	1683	2007-2008	1.896151118
47044	4	4	2	66	3	60486.63029	76524.74192	30.27	107.1	76.9	80	106	548.8	1	2662	2007-2008	0.845929959
47046	4	4	2	72	3	42808.27597	41612.16496	29.85	107.7	79.5	70	144	403.3	1	2206	2007-2008	-0.185544072
47053	3	3	1	58	3	24098.25878	24998.52014	21.8	83.3	58.5	84	190	2093.5	1	1617	2007-2008	2.241831881
47055	4	4	2	70	3	34642.82596	34699.46132	26.91	90	76.3	54	110	693.1	1	1327	2007-2008	-2.17414758
47057	4	4	1	47	3	101958.5018	105554.3466	31	112.5	101.1	78	114	665.3	1	1546	2007-2008	1.947541118
47063	3	3	2	40	1	15443.12856	15951.03705	29.12	95.2	70.5	64	112	910.4	2	1624	2007-2008	0.558368547
47068	2	2	2	62	4	10072.40981	10179.58752	23.88	91.5	64.7	56	146	1243.9	1	2534	2007-2008	2.87557717
47069	3	3	1	49	3	31268.88741	31262.94029	35.42	119.6	91.7	80	106	850.4	1	2986	2007-2008	2.235717236
47073	3	3	1	71	3	27657.57894	27269.72628	37.8	130.6	135.9	62	118	449.8	1	2311	2007-2008	-1.985979124
47084	2	NA	1	55	3	26423.58582	26471.8995	23.54	97.4	75.6	74	114	1173.8	2	3666	2007-2008	1.59465352
47087	5	5	2	63	2	10138.94889	10413.39555	31.31	107.5	71.1	60	112	657.3	1	1317	2007-2008	0.600205857
47096	5	5	2	46	3	97373.94673	99236.781	22.99	83	59.3	76	114	673.7	1	1788	2007-2008	2.707360886
47097	4	4	1	60	2	4634.676386	4939.552099	29.38	101.5	85.3	78	110	928.5	2	3056	2007-2008	-1.544731694
47106	5	5	1	72	4	10810.22751	11516.92275	35.33	127.4	112.2	56	128	351.7	1	2807	2007-2008	1.607463229
47109	2	2	1	63	4	7338.014307	7221.43496	16.96	68	49.7	84	144	707.9	1	3279	2007-2008	-0.565260842
47111	3	3	1	47	3	107335.6429	119313.6231	22.64	92.1	69.5	78	130	879.4	2	1452	2007-2008	2.498442695
47115	5	5	2	63	3	69611.6442	70420.17405	22.71	88	62.2	72	124	1625.4	1	983	2007-2008	2.12407411
47116	4	4	2	44	4	25458.24827	25351.90316	32.78	110	92.3	70	112	1181.8	2	2789	2007-2008	-0.373587145
47119	2	2	2	43	4	28558.83099	30959.84697	48.02	133.7	138.3	66	120	936.9	2	1569	2007-2008	-0.744168981
47121	1	2	2	56	1	9172.314713	9064.33865	36.59	107.2	78	114	198	797	2	1589	2007-2008	2.4637331
47132	5	5	1	69	2	7799.133473	8188.095788	29.82	102.8	92.9	72	126	1157.4	1	2743	2007-2008	-1.909664057
47136	1	5	2	62	2	4625.711085	4877.944227	23.09	83	52.5	92	174	933.4	2	1724	2007-2008	0.636829276
47141	4	1	1	51	2	9970.337025	10324.21947	22.28	92.6	65.3	68	112	1245.9	1	933	2007-2008	3.405022813
47146	4	4	1	40	1	18303.71976	18839.4527	26.57	89	74.2	74	114	864.5	2	2895	2007-2008	-1.289324996
47151	4	4	2	50	3	103644.0987	103314.91	22.88	83.4	62.9	72	124	1608.3	1	1057	2007-2008	3.317176018
47154	5	5	1	65	3	52939.84105	52278.53845	43.45	138.7	130.2	74	158	773.1	1	2677	2007-2008	0.108234987
47156	4	4	2	60	4	12310.32993	12078.86241	42.25	119.8	101.5	96	146	584.3	1	1171	2007-2008	3.27863756
47157	5	5	1	70	3	26505.27404	27221.17119	27.99	106.5	87.4	76	126	421.4	1	1323	2007-2008	-1.37444247
47158	5	5	1	49	3	75479.63979	78103.1466	27.13	103.2	81.4	74	126	929.3	1	1505	2007-2008	0.60703511
47159	2	4	2	47	5	84798.42535	84191.99197	37.89	114	107.2	72	126	680.5	2	3664	2007-2008	0.704634348
47162	1	1	1	43	2	20950.84125	22468.66976	29.45	103	77.3	84	120	858.5	2	5181	2007-2008	-1.57885737
47167	3	3	1	56	3	104240.2302	104430.8262	25.76	99.6	80.7	80	130	1840.2	1	3914	2007-2008	-0.848925918
47169	1	1	1	64	1	7160.648074	7928.063764	43.83	128.1	106.4	72	126	1001.3	2	2334	2007-2008	-0.284616199
47175	5	5	1	68	3	52939.84105	52278.53845	27.81	105.7	95.4	86	120	700	1	3052	2007-2008	-0.673229061
47176	4	4	1	74	3	30052.77379	29506.01983	21.59	91.2	77.6	78	108	767.5	2	2778	2007-2008	0.31550844
47179	5	5	1	62	3	48104.99465	49231.29009	25.18	95.1	84.5	72	118	650.9	2	1599	2007-2008	0.70889116
47186	5	5	2	60	4	11011.9105	11266.81054	23.3	93	65.6	72	126	685.6	1	1020	2007-2008	2.144060283
47190	3	3	1	65	3	53088.2953	51939.93303	25.12	91.6	85.6	90	116	612	2	2252	2007-2008	-1.458010461
47191	1	1	1	66	3	21953.47823	22614.28863	31.76	119	102	72	118	717.8	1	1392	2007-2008	3.761375439
47203	5	5	1	73	4	9369.943317	10569.38419	28.47	99.5	87.6	56	126	953.1	1	2304	2007-2008	-1.053559132
47206	1	3	2	73	4	13479.92625	14108.92409	28.8	100.7	NA	64	142	936.4	1	1224	2007-2008	2.719548822
47212	1	1	2	58	4	18328.23598	18251.67461	29.97	95.6	70.7	64	124	1057.5	1	1283	2007-2008	3.426996005
47216	5	4	1	57	3	63806.11334	63922.77837	28.02	107	92.6	66	140	933.5	1	3264	2007-2008	-2.987539363
47222	2	1	2	66	2	5992.011661	5814.814791	26.46	91.9	60.1	72	164	789.6	2	2012	2007-2008	0.520338877
47224	2	2	1	53	3	28740.13582	28792.68515	39.77	140.8	130.3	60	122	633.6	1	931	2007-2008	2.429427777
47228	3	1	1	46	1	16935.43398	17241.54775	28.24	99.5	78	90	136	1103	2	2997	2007-2008	0.968855566
47230	3	3	1	79	3	27844.15784	28048.03262	29.66	106	84.9	70	114	402.7	1	1904	2007-2008	1.413217516
47233	1	1	2	61	1	5164.551295	5101.779274	31.13	105.2	69.3	78	164	1951.6	1	2472	2007-2008	-0.338906616
47243	4	4	1	77	3	35245.13839	36197.09589	24.23	95.7	73.2	68	156	813.1	1	1265	2007-2008	0.466203235
47254	3	3	1	51	3	94535.82528	105297.5949	37.17	130.7	105.4	82	124	478.9	1	1440	2007-2008	0.923471743
47256	1	1	1	76	3	9498.128327	9325.327662	32.82	115.3	90.1	80	162	637.9	2	649	2007-2008	3.346115469
47257	1	2	2	63	4	10090.04427	11321.35554	23.08	86.2	55.3	100	176	911.3	1	1812	2007-2008	0.327292765
47258	2	2	1	61	4	7126.738729	7309.010239	19.37	75.2	65.8	62	124	1096.7	1	2980	2007-2008	-3.084590199
47262	2	3	1	53	1	7428.570153	8902.070473	34.1	109	90.7	76	142	1068	2	1294	2007-2008	0.653933281
47265	3	3	2	69	2	7277.593295	7177.028352	25.69	90.9	60.3	60	102	775.3	1	880	2007-2008	3.388763534
47270	1	1	2	48	3	28801.27392	28595.30247	37.69	123.7	95.4	68	158	568.2	1	1058	2007-2008	2.729380317
47272	5	5	1	78	3	28110.01693	28869.25757	26.77	101.4	68.7	64	142	463.4	1	1430	2007-2008	1.34585798
47273	1	1	1	62	1	9618.801295	10649.66037	28.8	100.7	NA	106	200	850.6	2	1190	2007-2008	3.060575697
47274	4	3	2	62	1	5140.677281	5279.82797	39.76	113.9	94.3	84	134	838.4	1	1188	2007-2008	2.898933943
47276	2	4	2	76	3	42628.81051	41437.71397	31.91	125	82.1	66	148	662.3	1	1457	2007-2008	-0.551258416
47277	1	1	1	75	3	14637.32357	14519.53505	29.37	110.2	83.4	94	154	718.2	1	1033	2007-2008	3.224673389
47280	2	2	2	45	3	22249.77586	22245.60146	29.06	94.1	77.2	68	122	691.8	2	2226	2007-2008	1.743119363
47281	4	4	1	49	3	33344.18472	37065.18526	31.54	115.7	97.8	74	128	833.5	2	1217	2007-2008	3.1112583
47286	3	2	1	60	4	7322.988469	7913.000604	27.72	103.2	77.4	72	126	1234.9	1	1285	2007-2008	3.190806239
47289	2	2	2	40	4	28425.71691	28306.97598	22.74	83.7	63.5	78	108	848.7	1	2082	2007-2008	1.653892586
47295	5	5	2	79	3	33525.31545	33580.12386	21.91	82.8	58	66	144	885.6	1	1689	2007-2008	0.245975203
47298	4	3	1	71	3	35083.63888	38599.17265	32.53	127	112.3	64	130	684.8	1	2343	2007-2008	-0.094541127
47299	2	4	1	76	3	11070.44659	11969.69062	28.8	100.7	83.2	54	126	1229.4	1	1793	2007-2008	0.548756602
47301	4	4	1	49	2	15222.69943	16748.23634	28.57	108.7	85.8	74	122	622.7	1	2714	2007-2008	1.98721199
47302	4	2	1	41	1	19683.93836	20039.73229	29.75	97.5	81	76	106	747.8	2	5441	2007-2008	-2.036830795
47303	1	1	2	56	2	10478.1382	10500.2965	33.6	91.7	74	80	140	1129.5	2	1002	2007-2008	1.483309458
47304	4	3	2	56	3	26707.17042	26622.34459	32.8	110.4	89.2	58	120	819.7	1	1517	2007-2008	2.160648567
47306	1	1	2	79	1	10626.05894	12749.52363	32.09	102.9	77	62	146	603	1	1292	2007-2008	2.454548777
47308	2	2	2	61	4	11011.9105	10836.53978	22.81	93	63.3	72	126	1374.5	1	616	2007-2008	1.111912905
47309	4	4	2	64	1	5228.078102	5685.289703	32.58	96.8	73.2	68	112	901.6	1	1952	2007-2008	-0.832292404
47310	4	5	2	67	3	52349.79319	56048.80631	20.63	78	53.2	82	154	805.1	1	1716	2007-2008	0.387472049
47318	2	3	1	53	1	11327.76197	11355.75815	27.08	95.1	80.4	88	124	1250	1	3372	2007-2008	-1.000937584
47319	4	NA	2	62	1	9407.095232	9549.205022	34.86	113.6	84.5	70	116	937.3	2	1769	2007-2008	2.290468034
47321	1	3	2	75	2	6170.479468	7235.357416	30.2	99.8	69.5	40	116	774.7	1	1789	2007-2008	0.673214913
47322	1	1	1	74	1	9398.931833	9986.525155	35.24	120	107.3	88	128	707.6	2	2054	2007-2008	0.525180643
47324	5	5	1	40	2	24613.89336	25381.65321	24.13	89.8	86	82	126	2669.7	2	4576	2007-2008	-2.956190569
47325	4	4	1	53	3	75788.03137	79280.06801	27.47	96.5	90.1	80	140	672.4	2	2324	2007-2008	-2.178762379
47327	3	3	1	53	3	83459.20123	83611.80056	30.16	109.4	91.3	90	148	612.9	2	2952	2007-2008	2.11768746
47331	1	1	1	65	2	5134.791556	5934.240015	28.27	100.1	73.1	72	128	1459.3	1	640	2007-2008	4.070898571
47332	4	4	1	43	4	24206.11648	24071.97269	27.39	89.9	83.5	84	128	804.4	2	954	2007-2008	2.975921942
47335	1	1	1	76	3	11265.8589	11060.89768	24.36	91.1	76.5	62	98	589.7	1	2569	2007-2008	1.023675428
47337	3	3	2	48	4	26877.38228	26765.10911	44.93	119.4	106.7	82	132	702.6	1	1065	2007-2008	2.342100778
47339	2	2	2	49	3	29253.34768	30886.47423	38.55	118	107.9	74	108	642.2	1	1083	2007-2008	2.539522019
47345	5	5	1	61	1	8842.521562	9424.195413	21.94	84.9	61.4	80	122	341.1	1	1840	2007-2008	1.805415136
47350	4	4	1	54	1	14567.16295	15021.54384	26.91	93	74.5	84	112	576.1	1	1964	2007-2008	2.362568453
47352	1	1	2	66	2	5992.011661	5814.814791	21.33	92.3	51.7	62	114	553.5	1	867	2007-2008	2.029111838
47365	1	3	2	66	2	6106.112569	6600.9121	28.8	100.7	NA	64	150	833.5	1	1109	2007-2008	1.101488639
47368	1	1	2	43	1	19072.5712	18848.04978	24.19	81.2	48.7	58	102	674.2	2	1662	2007-2008	0.783614271
47369	1	1	2	75	1	10626.05894	11181.92454	37	121.2	87.3	46	140	1321.8	1	1312	2007-2008	1.052077148
47372	3	3	1	56	3	86921.81896	88761.01177	27.38	105	88.5	84	154	1022.7	1	3537	2007-2008	-1.132259094
47375	4	5	1	61	3	47908.54622	48298.36672	28.62	104	83.5	76	166	1155.1	1	1115	2007-2008	-0.201863073
47377	5	5	1	53	5	72477.39701	74245.82713	23.31	81	61.7	70	110	704.5	1	997	2007-2008	1.124734875
47380	2	2	1	57	1	7524.413892	9016.925377	26.91	91.8	70.7	80	128	1356	2	2372	2007-2008	-1.921567925
47382	3	3	2	69	4	12648.5819	12425.42818	41.02	109	95.9	44	96	437.5	1	958	2007-2008	2.525050421
47384	1	4	1	64	1	5524.575822	6116.651584	27.13	103.7	74.5	84	144	635.5	2	2313	2007-2008	2.382002947
47388	1	1	2	63	1	3971.670956	4029.314509	27.57	102.4	72.9	64	142	1221.4	1	1309	2007-2008	3.20002461
47389	3	3	1	60	4	6933.4363	6742.801687	22.48	88.9	69.4	84	144	1212.1	2	1495	2007-2008	1.394859321
47395	5	5	1	40	3	75464.0677	76683.04766	25.78	102.2	92.3	100	150	812	1	3071	2007-2008	0.982784455
47396	5	5	2	75	2	8769.324154	9341.174266	23.82	85.8	63.9	68	132	998	1	1167	2007-2008	2.809436374
47397	4	4	1	62	3	49330.97891	48263.89181	39.95	136.1	126.3	64	138	529	1	873	2007-2008	1.645226718
47399	4	4	2	41	4	25458.24827	27598.59012	38.22	115.3	95.4	76	154	727.1	1	1458	2007-2008	0.252178151
47403	5	5	1	61	4	7963.934774	8067.285767	25.85	89.8	79.8	78	134	930.7	2	1607	2007-2008	2.952278511
47404	5	5	1	50	4	49253.10237	48980.15493	33.64	109.8	110.7	86	150	1193.6	2	914	2007-2008	2.427452443
47412	2	2	1	45	4	31248.65433	31075.48269	22.92	83.3	73.7	68	106	1163.7	2	2164	2007-2008	1.811184785
47418	4	3	1	45	3	90414.49484	98779.21178	30.91	106.4	86.2	74	116	808.7	1	2301	2007-2008	2.474973911
47420	3	3	1	50	2	14772.34746	14808.85681	20.54	87.9	61.7	90	160	709.3	2	1234	2007-2008	2.927566711
47421	3	1	1	65	5	55433.50027	69158.1645	25.14	96.6	69.7	70	134	873.1	1	1641	2007-2008	1.892549348
47426	3	3	2	78	3	39642.0078	39293.83738	29.64	108.6	77.3	58	104	732.5	1	1272	2007-2008	1.660744143
47430	4	4	1	43	4	23966.45196	23833.63633	33.4	111.1	115.8	88	118	874.5	1	3840	2007-2008	-0.031017508
47432	5	5	2	58	3	119835.7089	119455.0934	30.72	107.4	87	70	112	899.2	1	658	2007-2008	1.36421985
47437	2	2	2	40	3	26629.25465	26438.81634	23.42	81.9	60.7	82	132	1866.2	1	1941	2007-2008	2.284721582
47444	5	5	1	40	1	22317.30614	22720.6991	31.42	110.2	93.7	86	124	733.9	2	1689	2007-2008	0.87959872
47452	4	4	1	56	2	13322.27418	14627.32181	25.07	98.5	85.7	80	128	1229.7	2	2945	2007-2008	-1.419714419
47455	2	2	1	73	3	28153.11442	29102.44655	40.7	125.5	116.8	64	142	883.7	1	1452	2007-2008	-2.357411634
47460	2	3	2	46	3	29670.9949	29458.80368	44.45	127	97.9	80	134	912.1	1	1631	2007-2008	3.193848314
47466	3	3	2	47	1	23522.51993	23245.61392	26.58	90.1	63.2	80	116	610.9	1	1663	2007-2008	1.456679519
47469	4	4	1	55	3	82326.83785	82477.36674	33.2	121.2	111.2	82	126	835.3	2	2167	2007-2008	-0.576691549
47475	5	5	2	44	3	82023.23072	85297.90368	26.03	86.3	65.8	90	126	700.8	1	1201	2007-2008	0.780349907
47477	3	3	2	59	3	95352.03813	95049.18628	27.37	100.7	65	72	126	697.3	1	1112	2007-2008	1.528299116
47481	2	2	2	44	5	29322.50606	29362.82084	15.77	71	45.2	84	130	1275.3	1	18	2007-2008	4.386280663
47485	5	5	2	61	3	59356.35643	60045.7725	37.84	115	104.9	78	106	987.1	1	1266	2007-2008	2.310194698
47490	4	4	2	67	3	59522.80391	61219.80021	20.92	87	52.9	76	126	1115	1	1780	2007-2008	1.79492599
47493	3	3	1	43	3	21907.08163	21902.91506	29.66	100.4	94.5	80	126	1641.1	2	1294	2007-2008	2.486221969
47497	4	4	2	49	3	78063.31311	80288.24699	24.15	83.7	68.8	68	128	359.3	2	2934	2007-2008	-0.706329643
47498	3	4	2	46	3	79169.18009	79538.22115	25.46	80.7	66.4	64	106	535.7	1	1962	2007-2008	2.273313019
47500	1	4	2	57	1	15324.08062	15828.07375	27.37	88.4	62.5	64	118	553.5	1	2874	2007-2008	1.474108337
47505	4	3	1	78	3	8872.862854	8711.437723	28.06	102.5	83.2	50	144	917.2	1	2421	2007-2008	1.193455592
47511	1	1	1	71	3	9935.266183	10270.28658	29.6	115.6	89.1	74	188	904.2	1	1477	2007-2008	1.720665335
47512	5	5	1	52	3	21955.53239	24035.18274	26.3	98.2	85.5	90	136	829.1	2	3333	2007-2008	0.162233191
47513	2	2	2	50	1	12227.15757	14444.29879	30.1	95	70	72	126	730.6	2	1556	2007-2008	0.91962569
47518	4	4	1	77	3	35745.96155	35681.76888	25.05	92.7	74.1	76	152	599.1	1	2363	2007-2008	1.44624517
47520	5	5	1	56	3	83459.20123	83611.80056	31.14	106.6	100.9	82	120	1009.7	1	4466	2007-2008	-1.323976944
47522	4	4	1	58	4	32161.60861	34700.17965	29.8	107.7	99.8	76	118	407.5	1	2321	2007-2008	1.84602958
47523	5	5	2	54	3	34717.48276	36107.30962	21.87	72.3	51	72	126	789.3	1	715	2007-2008	3.877056412
47524	1	1	1	76	3	30137.04798	29588.7608	20.23	79.7	57.5	72	166	866.8	1	729	2007-2008	3.930961486
47528	5	5	2	40	4	23833.86139	25371.59068	24.26	83	70.1	72	118	340.2	2	1334	2007-2008	2.846330926
47532	4	3	2	62	3	59522.80391	60214.15324	30.97	96.7	77.5	68	118	537.8	1	1785	2007-2008	0.426710463
47533	5	5	2	63	3	55604.39463	56250.23217	30.58	100.6	77.7	76	134	869.7	1	1267	2007-2008	-0.297957407
47534	4	5	1	51	3	116687.2238	116900.5783	30.67	111.8	96.1	76	128	936.5	1	1257	2007-2008	3.349353853
47537	5	3	1	54	1	18404.43327	19737.78181	35.92	116.8	105.4	60	110	391.7	1	2071	2007-2008	1.182528138
47551	2	2	1	72	4	8434.921462	8628.595523	16.97	68.5	53.3	46	144	536.7	1	4321	2007-2008	0.052475868
47552	5	5	1	56	1	12775.87449	14056.20379	33.78	116.7	101.7	62	114	743.7	1	4507	2007-2008	0.225982299
47560	4	4	2	71	3	33715.31325	33320.6218	20.82	75.2	55.8	70	120	956	1	2220	2007-2008	-1.381813172
47563	3	3	1	52	3	99960.09181	102075.1635	29.26	102.4	88.9	70	106	877.4	2	2765	2007-2008	0.711914975
47564	4	4	2	46	3	26186.97577	26222.97959	32.23	101.6	90	64	114	607.1	1	1098	2007-2008	3.13977721
47567	4	4	2	58	4	22428.7243	22837.22915	63.95	120	146.2	80	146	414	1	2086	2007-2008	1.146173096
47572	2	2	2	68	3	29950.95902	34184.67219	26.06	98	67.8	68	110	1113.3	1	1179	2007-2008	-0.253818236
47578	5	5	1	55	3	66464.94794	67674.92491	27.27	106.2	86.3	64	106	1140.4	1	2419	2007-2008	0.855923681
47579	1	1	1	68	2	12040.76208	12992.42193	27.95	106.4	86.2	76	142	771.2	2	1373	2007-2008	2.75068858
47580	2	2	2	48	4	25443.30768	27807.43997	30.7	98	84.4	94	160	598	2	4752	2007-2008	-3.426226235
47588	4	4	2	77	3	33663.70102	33718.73567	24.89	92.4	64.2	70	116	672.3	1	1364	2007-2008	-0.262935155
47589	4	4	1	51	4	16768.76645	16782.88483	18.99	79	69	86	136	825.2	1	3890	2007-2008	-1.349117872
47590	4	4	2	49	3	92172.71634	91513.54594	21	87	55.1	66	94	814.5	2	2056	2007-2008	0.612232963
47603	2	1	1	52	1	10385.54626	10689.52158	25.77	92.9	75.8	74	140	1544.8	2	5607	2007-2008	-1.249800395
47607	4	4	1	51	5	24442.3073	24486.99835	29.34	107	83.8	74	122	710.5	1	3700	2007-2008	0.051921686
47610	1	1	1	63	2	4078.112176	4713.043596	24.4	92	60.3	62	102	642.3	1	815	2007-2008	3.593722237
47614	1	1	2	75	3	41869.27714	40699.40281	29.63	101.1	73.5	78	108	940.8	1	1348	2007-2008	1.359263643
47620	1	1	2	71	1	6638.883255	6986.173518	33.41	107.9	72.3	50	104	938.1	2	1510	2007-2008	-0.765721869
47621	2	2	2	58	1	11904.69842	12079.04162	37.84	101.5	92.2	72	126	635	1	1253	2007-2008	3.472244389
47623	4	5	1	55	4	15735.36417	15498.52193	25.75	92.9	81.6	84	140	937.4	2	2109	2007-2008	0.785278215
47626	5	5	2	67	3	59522.80391	61219.80021	22.93	82.7	62.2	74	142	1450.7	2	972	2007-2008	1.1873824
47631	4	3	1	71	3	9471.568094	10921.80219	28.93	106	88.2	62	106	719	1	2531	2007-2008	-1.664276522
47635	4	4	1	66	1	7799.133473	8410.121353	29.16	105.4	81.9	62	92	534.6	1	1161	2007-2008	3.254813268
47636	1	1	1	74	1	7661.379516	7686.461393	34.51	113.2	93.6	76	134	636.7	1	543	2007-2008	3.98445001
47637	4	4	1	40	1	23121.2265	23842.42688	39.51	125.5	119.9	84	134	1187.7	1	2606	2007-2008	2.02166909
47642	4	4	1	61	4	6379.22495	6177.592018	30.88	104.5	97.5	70	116	1049.5	2	1864	2007-2008	2.185475391
47650	5	5	2	63	3	45821.89946	57971.63792	31.29	116.4	79.6	64	116	670.7	1	1329	2007-2008	2.338248001
47659	5	5	1	43	3	142249.3823	144772.0495	27.56	98.7	92.5	82	120	1926.2	1	1391	2007-2008	2.113238052
47661	3	3	1	72	3	28004.10278	27611.39069	28.57	109.4	88.7	58	128	660.2	1	2061	2007-2008	-1.543051182
47668	2	2	2	68	4	16672.19418	17984.41956	27.49	101	70.2	74	122	505.5	2	1370	2007-2008	1.890427615
47677	2	2	2	57	4	21711.85987	23112.68042	37.68	106.5	100.1	70	140	1029.7	1	2049	2007-2008	2.08533677
47678	3	3	1	62	1	8372.136628	8668.614011	28.9	108.2	86.8	70	136	786.4	1	2277	2007-2008	1.051154113
47685	1	1	1	53	1	14581.43092	15278.0746	27.75	99.6	80.1	60	112	955.3	2	1508	2007-2008	3.266872275
47689	4	5	2	79	3	22147.57128	21729.85764	25.46	94.5	58.9	56	132	501.5	1	1727	2007-2008	2.516133358
47694	2	4	1	49	4	22803.82939	22460.5955	28.8	100.7	NA	72	126	785.2	1	1513	2007-2008	2.025414294
47696	5	5	1	62	4	6933.4363	7106.177171	28.8	100.7	NA	72	108	748.2	1	1902	2007-2008	2.224358313
47701	5	5	1	60	5	64298.04448	65803.47224	21.26	74	52.6	68	110	930.5	1	2460	2007-2008	1.101013418
47705	4	4	1	74	3	27994.46158	28750.58111	36.74	132.2	117.2	88	152	579.4	1	1519	2007-2008	-3.738637968
47706	5	5	2	44	3	61948.87908	61505.85354	21.32	81	65	74	114	1006.8	1	2393	2007-2008	0.255075507
47712	1	1	1	43	1	19683.93836	20039.73229	25.52	93	66.8	70	124	1433.6	2	1581	2007-2008	2.414624376
47721	5	4	1	61	4	7750.960967	7618.352686	32.97	113.5	102.7	72	160	660	1	2065	2007-2008	1.724419189
47724	1	1	2	42	1	18215.60991	21518.63266	34.83	108.5	87.4	64	100	573	2	863	2007-2008	1.791436849
47725	1	1	1	70	4	11283.6325	11358.32674	17.47	76	56.3	84	134	2000.1	2	2021	2007-2008	3.176947578
47727	5	5	2	42	3	88636.92626	88003.04195	23.31	88	65	80	132	560.1	2	4104	2007-2008	-0.690955181
47728	1	1	2	73	4	13104.92612	13027.58664	38.67	96.5	102.5	70	156	1416.4	1	1872	2007-2008	0.159633357
47730	1	1	2	67	3	22354.43662	23641.42235	21.64	88.7	56.3	60	114	666.7	1	2498	2007-2008	-3.489423348
47740	4	4	2	67	3	53385.53638	60518.21491	38.83	107.9	99.4	54	110	1029.5	1	1094	2007-2008	-0.228334846
47741	5	5	1	51	3	76861.66606	77918.37301	31.8	106.6	96.5	72	110	496.5	2	2777	2007-2008	-0.02549262
47746	5	5	2	58	5	131087.8882	130671.5341	26.15	83.2	67.7	84	126	714.4	1	2000	2007-2008	2.639250917
47754	5	5	2	70	4	10426.77358	10680.6131	35.19	108.8	89.4	86	134	575.8	2	969	2007-2008	1.651177889
47757	3	3	1	70	3	43488.8604	43807.2856	24.61	100.7	75.8	56	154	633.4	1	2185	2007-2008	0.36919963
47758	5	2	2	71	3	41869.27714	47800.7147	27.57	110.9	69.7	76	156	1851.4	1	865	2007-2008	3.563845491
47759	3	3	1	54	1	10622.50806	11392.07838	30.35	100.7	87.6	66	118	764	2	1685	2007-2008	2.445028657
47771	2	2	2	79	3	32834.38327	31916.95395	22.71	87.1	60.7	0	126	758.9	1	1256	2007-2008	2.204204856
47778	2	2	2	67	3	21709.85827	22959.73444	31.54	108.8	86.4	60	104	583.5	1	400	2007-2008	4.181612684
47779	2	3	2	44	1	22403.09996	22139.37171	29.07	89.8	68.4	72	126	488.3	2	716	2007-2008	1.887646975
47788	2	2	2	75	3	33715.31325	34506.17022	25.34	89.6	69.5	70	120	618.3	1	2405	2007-2008	-1.576947751
47789	1	2	1	51	1	10791.36775	11084.31245	23.33	100.7	64.6	74	118	582.4	2	3791	2007-2008	-0.452953926
47790	5	5	1	62	3	52939.84105	51794.69002	28.59	101.6	91	76	116	509	1	1072	2007-2008	0.390502468
47793	4	4	1	56	1	9300.985806	10233.08049	33.03	115.5	100.8	70	132	655.6	1	1302	2007-2008	3.64851894
47802	4	4	2	40	1	11145.95244	11312.27661	32.62	100	87.1	80	120	961.2	1	1632	2007-2008	2.975861566
47808	5	4	2	52	3	73901.08876	73666.36823	40.03	131.3	113.8	62	114	1350.8	1	3818	2007-2008	-2.953766023
47809	4	3	2	63	4	10410.69139	10064.25648	36.98	109.4	100.3	70	126	1782.5	1	1141	2007-2008	2.201617294
47813	4	4	1	63	1	3692.126197	3981.369145	35.11	131.4	121.6	66	112	686.7	1	2554	2007-2008	-0.693067239
47818	3	3	1	71	3	31923.5548	32369.81033	26.31	99.4	75.4	74	126	663.7	1	1635	2007-2008	1.48545175
47819	5	5	1	59	3	103466.0105	103655.1909	39.31	123.2	120.8	60	90	976.5	1	4525	2007-2008	-0.798409615
47824	4	4	1	70	3	13817.7985	13693.14232	35.88	128.1	109	62	122	624.7	1	2638	2007-2008	1.063989917
47825	3	5	2	69	2	10138.94889	9998.844493	21.97	80	49.9	70	176	1205.4	1	937	2007-2008	-2.128663311
47832	3	4	2	42	4	25849.62213	25741.64216	23.77	80.4	64.1	68	122	522.7	1	4438	2007-2008	-1.942835272
47837	1	1	2	50	2	12873.99413	12722.44207	50.18	128.2	138.1	78	112	956.8	2	3415	2007-2008	-0.664414066
47841	5	5	1	73	3	31729.69159	39724.68564	27.11	100.7	65.3	94	184	519.9	1	1302	2007-2008	2.917822849
47846	2	4	1	79	3	9471.568094	10921.80219	38.94	135.5	123.1	44	140	693.3	1	1033	2007-2008	2.002728833
47850	3	2	2	49	3	74400.22008	75823.55028	27.63	91.5	68.2	66	124	983.6	2	1685	2007-2008	3.103518018
47859	2	2	1	47	3	28803.80468	31602.18892	15.66	70	43.2	56	158	939.9	1	2240	2007-2008	-0.018560949
47860	3	3	1	52	3	21569.88388	22364.6692	21.81	79	63.4	76	118	1182.3	2	11477	2007-2008	-3.751975024
47864	4	4	1	57	2	11086.85851	12197.92373	26.8	91.8	75.9	86	134	700.1	2	2020	2007-2008	-0.925691213
47868	5	4	1	72	4	8871.501766	10007.13743	27.05	98.8	77.8	64	144	777	1	934	2007-2008	-0.389258887
47869	1	1	1	75	3	11265.8589	11060.89768	28.98	113.6	94.3	66	134	534.7	1	1858	2007-2008	2.454563246
47872	4	4	2	72	4	12555.10872	12667.88433	32.06	98.9	82.7	36	130	1046.7	1	1278	2007-2008	2.659607554
47874	3	3	2	79	3	22147.57128	25285.12093	20.36	74	50.5	64	150	963.8	1	1196	2007-2008	2.603093832
47877	4	4	1	55	5	18328.8717	18662.54401	25.05	87.1	74.9	74	114	943.9	2	1857	2007-2008	0.9225378
47880	2	2	1	50	4	20422.84537	20557.39163	18.75	71.3	53.8	74	132	605.3	2	2044	2007-2008	1.952952048
47881	3	3	1	44	3	101958.5018	105554.3466	27	96.7	98.2	68	126	663.9	1	4065	2007-2008	-1.437413232
47885	3	3	1	50	3	22698.3814	22739.8838	26.56	90.9	72.3	46	116	535.5	2	4290	2007-2008	-2.533246623
47886	5	5	2	74	3	33715.31325	32773.26977	23	88.7	60.2	66	144	667.7	1	999	2007-2008	1.137775441
47894	5	5	1	43	3	68286.46664	68273.47904	27.59	103.6	84	76	106	1038.5	1	2659	2007-2008	-1.421520887
47901	5	5	1	61	2	8017.063535	8168.3632	32.72	123.4	110.3	76	114	563.5	1	1911	2007-2008	1.044849821
47903	2	5	1	45	3	57669.44783	60205.09157	32.85	115.9	114.5	90	120	791.2	1	2439	2007-2008	2.198537724
47904	4	4	1	64	3	52939.84105	51794.69002	31.09	108.8	105.6	94	130	817.4	1	1587	2007-2008	0.009753834
47909	1	1	2	69	1	4502.674979	4748.199145	30.14	98.3	69	80	172	715.6	1	1589	2007-2008	-3.147021739
47910	2	4	2	52	3	104007.45	110253.564	23.43	90.5	61.8	70	152	664.1	1	2509	2007-2008	3.475277225
47911	3	3	2	61	4	16672.19418	16378.05352	32.4	105	81.3	66	138	386.3	1	844	2007-2008	3.21434275
47926	1	3	2	40	1	13863.63909	16377.52227	28.8	100.7	NA	72	126	330	1	832	2007-2008	2.872262759
47929	5	5	2	72	3	27789.5029	27834.93419	25.51	98	78.3	60	124	868.8	1	1938	2007-2008	-2.947439422
47930	4	4	2	48	3	33610.29811	33369.93508	24.53	90.1	63.2	80	138	484	1	817	2007-2008	4.071865043
47936	5	NA	2	46	3	110717.7553	110696.983	24.06	79.1	63.6	64	108	717.8	2	1888	2007-2008	-0.02011359
47937	4	5	2	60	3	88922.83332	90795.9953	28.81	88.4	75.8	74	148	883.9	1	989	2007-2008	2.649949124
47938	1	1	1	40	3	32252.66425	35386.11653	26.33	95.1	77.7	74	114	535.3	1	2254	2007-2008	3.30210646
47939	5	5	1	75	4	9369.943317	9431.969508	27.61	109.3	83.5	50	120	765	1	1809	2007-2008	2.532491622
47943	4	4	2	46	3	30961.58203	31844.03846	21.54	77	56.6	64	98	710.4	1	2027	2007-2008	2.587600483
47949	4	4	2	49	3	38209.20663	37935.95464	37.52	118.8	99.7	82	138	948.9	1	1329	2007-2008	1.201980722
47950	4	4	2	42	2	27235.08739	27292.68191	24.51	83.3	58.2	62	108	457.8	2	1961	2007-2008	-0.508162373
47957	2	NA	2	59	3	32308.47072	33058.39181	24.99	92.3	62.7	62	114	1457.1	1	2348	2007-2008	-1.863504768
47958	5	NA	2	49	3	82023.23072	85297.90368	33.24	100.6	88	66	110	1042.4	1	1978	2007-2008	0.366923952
47960	3	3	1	64	3	82137.03126	80360.31065	28.38	100.7	94	74	154	828.8	1	1545	2007-2008	-1.597466728
47963	2	2	2	60	4	11318.91974	12700.19351	37.97	119.6	96.6	94	188	879.4	2	345	2007-2008	4.241240975
47972	2	2	2	67	3	22473.38602	22734.41136	29.64	103.7	75.6	74	156	699.9	1	749	2007-2008	3.0725164
47976	2	3	1	57	4	17975.54114	18352.86066	37.55	124.5	112.9	90	142	1087.6	2	1272	2007-2008	2.402619559
47979	2	2	1	68	3	20889.05522	21517.82596	21.79	88.6	57.9	72	126	829.5	2	1900	2007-2008	3.109079383
47982	5	5	1	45	3	68286.46664	68273.47904	24.15	93.3	92.1	70	122	391.8	2	1482	2007-2008	1.35309684
47986	4	1	1	71	3	25771.89403	28354.35032	20.56	81.9	61.6	72	116	958	1	1753	2007-2008	-1.305573828
47987	1	1	1	45	2	28108.10225	28177.57045	33.17	108.3	87.7	74	126	776.4	2	3229	2007-2008	1.664849673
47993	3	2	1	45	4	23724.1893	24222.17708	22.48	81.4	70.2	62	120	898.2	2	3040	2007-2008	1.277921512
48002	3	3	2	58	3	35477.86839	35365.18556	36.21	113.5	97.4	72	124	868.2	1	2398	2007-2008	1.196344768
48005	3	3	2	73	3	51116.47427	50979.5167	31.14	107.5	72.8	76	144	1006.4	1	982	2007-2008	3.1051768
48006	3	3	1	78	3	28153.11442	35246.91113	28.73	113	80.4	48	150	554.8	1	1231	2007-2008	1.397552113
48009	2	2	2	52	3	23060.75834	22987.51404	23.51	86.3	60.1	60	108	1216.1	1	696	2007-2008	3.484078744
48010	1	1	2	79	1	8807.333857	10142.35644	25	93.7	53.5	90	168	1015.4	1	798	2007-2008	1.054124498
48011	4	4	2	53	3	117656.735	122366.8257	21.55	87.5	59.1	94	126	802.6	1	3678	2007-2008	-1.488873314
48014	3	3	1	45	4	28456.58978	30702.71732	23.06	84.7	73.8	72	126	1291	2	2506	2007-2008	3.658621101
48016	3	3	2	75	2	5958.305626	6720.796049	29.09	97.7	67.2	72	140	526.3	1	1414	2007-2008	-0.132854793
48018	4	5	1	59	1	11666.903	11695.73735	34.36	117.5	101.4	72	126	1210.1	2	2003	2007-2008	0.164698664
48021	4	4	2	58	4	19905.92012	20258.28066	41.16	120.2	112.2	70	148	1503.2	1	1732	2007-2008	4.117781607
48023	2	3	1	49	3	36767.07195	37469.38141	23.03	84.8	72.8	106	200	647.9	1	3811	2007-2008	-0.610721493
48027	4	3	2	58	4	20683.13277	20596.73444	37.43	113.3	108.3	74	104	520.5	2	3081	2007-2008	0.36106316
48033	5	5	1	58	3	81663.15864	89777.89975	24.1	98.2	81.6	76	126	802.4	1	3227	2007-2008	-4.609449724
48038	4	3	1	61	1	6543.699957	6870.050659	29.58	96.6	82.5	78	126	776.3	1	2250	2007-2008	0.120424662
48040	3	3	2	62	4	9544.755375	10068.07316	25.43	93.5	69.9	66	170	741	1	666	2007-2008	1.027779027
48042	2	2	2	79	3	42969.40373	46529.43804	23.59	84.1	50.9	64	156	1376	1	1183	2007-2008	3.111378703
48047	4	4	2	56	5	119055.4749	125825.0485	32.77	100	81.3	84	144	1061.9	2	2163	2007-2008	3.266368045
48048	1	1	1	48	2	23869.57889	23928.57174	34.96	114.2	109.4	92	144	772.1	1	2734	2007-2008	1.881805798
48050	1	3	1	50	1	9863.766777	10335.01893	31.06	106.7	90.3	82	116	503.9	1	1054	2007-2008	3.457237061
48051	2	2	1	46	3	27331.32077	27326.12255	34.67	124	98.9	70	124	534.8	1	1825	2007-2008	-0.215961346
48054	5	5	2	45	4	28558.83099	28439.53401	42.36	120	114.2	82	136	1141.7	1	1465	2007-2008	1.018007616
48055	2	3	2	58	4	24487.44926	26762.76543	29.56	90.4	75.2	94	178	661.6	2	1701	2007-2008	1.672735834
48058	4	NA	2	52	1	13738.36182	13943.37092	32.72	106.7	76.2	64	136	986.1	1	2901	2007-2008	1.858949797
48063	4	4	1	44	4	23532.29255	24777.01362	25.81	95.8	78.5	68	116	689.6	2	2463	2007-2008	1.154101617
48065	1	1	1	79	3	9507.573661	9334.601155	26.97	103.5	76.2	58	138	1292	1	1133	2007-2008	2.503991761
48067	4	NA	2	45	3	129047.3825	132725.4469	20.61	76.7	51.9	76	96	1156.8	1	2674	2007-2008	-0.319491983
48069	5	5	2	59	3	90237.94935	93850.39806	35.24	107	90	52	122	1042.3	1	2207	2007-2008	0.125334342
48070	2	4	2	67	1	6681.804407	7046.153259	24.91	86.9	59	64	130	526.8	1	613	2007-2008	3.652730683
48071	4	4	1	45	3	93473.60161	93455.8236	26.28	96.9	92.7	86	128	735	2	1857	2007-2008	0.227303854
48076	4	4	1	70	3	30052.77379	29506.01983	29.15	107	80.9	90	180	971.1	1	2306	2007-2008	0.780857587
48086	4	3	1	75	3	26604.03896	26120.02827	26.36	93.5	76	72	188	1007.6	1	1192	2007-2008	-1.105214781
48089	4	4	1	40	3	90414.49484	98779.21178	35.04	121.7	119.4	74	128	964.5	2	2512	2007-2008	-0.046515985
48097	1	1	2	50	1	13426.56504	13268.50814	32.02	98	70.9	60	112	601.1	2	1630	2007-2008	-0.573939746
48101	3	3	2	73	3	33715.31325	33847.18962	27.18	100.2	65.9	78	124	557	1	2195	2007-2008	2.94959837
48103	5	5	1	49	5	23566.12001	24489.11044	32.72	107.8	89.4	72	126	1532.9	2	2874	2007-2008	0.348908023
48133	3	NA	1	52	3	24758.78665	24804.05637	36.26	120	104.8	74	138	1275.8	1	998	2007-2008	1.838355969
48135	4	3	2	64	3	28422.21374	28752.33392	23.72	91.3	68	80	114	774.5	1	1704	2007-2008	-0.621058519
48140	2	2	2	69	1	5992.011661	5814.814791	27.16	88.2	66.1	52	120	724	1	768	2007-2008	2.829811026
48143	3	3	1	57	1	14238.1869	15632.95718	37.12	115.3	101.3	72	126	501.2	1	1895	2007-2008	1.422076751
48146	4	4	1	61	4	5689.981299	7026.364831	56.25	159.1	159.9	68	130	1465.1	2	2617	2007-2008	1.110852842
48148	2	4	1	49	2	20643.62113	22712.4136	32.91	109.4	105.8	94	130	758.5	2	7488	2007-2008	-3.168586294
48151	4	4	1	55	3	101584.687	106265.3396	21.29	87.2	70.6	68	120	865.8	1	3267	2007-2008	1.19280104
48156	5	4	2	57	3	115775.1073	115407.3888	30.82	101.6	78.6	84	148	603.3	1	2543	2007-2008	2.760330412
48159	4	4	1	61	4	6350.039051	6508.245058	23.83	94.5	67.9	64	156	406.7	1	2200	2007-2008	0.636766488
48163	2	4	1	43	4	24472.84204	25767.3127	26.44	80.8	68.1	52	98	1579.1	2	2546	2007-2008	1.538957357
48164	4	5	1	69	5	17290.31078	16916.30102	24.79	91.5	63.7	66	132	677.2	2	1572	2007-2008	-2.900179741
48169	4	4	2	48	1	22291.90488	22624.55323	28.74	94.4	74.3	74	122	811.1	2	869	2007-2008	0.496429846
48175	5	5	2	59	4	34191.53044	37066.10227	31.71	104.2	91	72	126	550.9	1	2269	2007-2008	1.756657254
48176	3	3	2	59	3	137681.066	137243.771	41.43	134	117.9	72	142	768	1	1479	2007-2008	2.556793281
48181	5	5	2	40	3	135251.5836	140105.0646	26.9	90.2	82	70	96	479	2	1575	2007-2008	2.349440511
48182	3	3	1	57	3	83459.20123	83611.80056	27.38	107.6	92.8	74	102	1079.2	1	2462	2007-2008	2.799147492
48190	3	3	1	59	3	23965.26637	24009.08519	38.39	129.6	120	90	138	883.7	1	2172	2007-2008	1.638834093
48191	4	4	2	48	1	22403.09996	24298.00856	38.93	120.7	101.8	82	178	983.5	1	2336	2007-2008	1.651848058
48194	3	3	2	64	3	21236.8276	21842.28997	22.7	86.9	54.6	70	166	1212.9	1	1591	2007-2008	-0.095781629
48200	2	2	1	55	3	22515.39801	24752.7181	26.52	99.4	81.4	88	150	695.2	1	2063	2007-2008	2.808095467
48208	4	4	1	52	3	79933.70849	80079.8617	28.29	104	80.8	68	134	1186.6	1	2467	2007-2008	0.41794311
48211	5	3	2	54	4	20231.14223	20146.63197	27.28	97.8	81	72	126	644.4	1	780	2007-2008	4.079116361
48213	1	3	1	63	1	8372.136628	8683.241004	22.38	93.2	68	70	144	439.4	1	1287	2007-2008	1.620440682
48215	1	1	1	49	1	22317.30614	22720.6991	26.32	99.5	69	78	130	708.3	1	3345	2007-2008	-0.31961534
48217	3	3	1	75	3	46627.37121	45779.07347	31.23	111.8	90.8	70	132	1116.8	1	2478	2007-2008	0.321840553
48223	1	1	1	56	3	81663.15864	89777.89975	21.63	92.2	58.9	92	140	1094.2	1	3819	2007-2008	-0.716558285
48224	4	3	1	59	3	83459.20123	83611.80056	24.96	97.8	80.5	64	116	1033.1	2	2089	2007-2008	2.384546213
48237	2	2	1	41	1	24613.89336	27080.56513	26.08	98.6	81.8	78	120	592.6	1	3411	2007-2008	0.943516455
48245	2	2	1	43	4	22803.82939	22460.5955	19.34	69.7	54.9	68	110	1036.9	2	2915	2007-2008	-0.334902858
48247	2	3	1	70	3	28110.01693	31304.71465	28.56	104.6	90.2	92	152	1021.1	1	2158	2007-2008	0.989745622
48248	2	2	1	50	2	9419.043905	9712.843979	38.46	123.6	116.7	90	134	991.5	2	4040	2007-2008	-2.091398572
48249	5	5	1	78	4	9878.347344	10401.55232	22.78	82.1	60.6	72	130	1040.1	1	1462	2007-2008	2.889539963
48251	2	2	1	68	3	46864.6789	45850.94077	21.29	88.7	63.5	82	134	1246.5	1	3470	2007-2008	-0.239423166
48256	5	5	2	77	3	16187.96071	16214.42539	32.09	104.3	76.4	84	154	785.3	2	1882	2007-2008	-0.178786156
48257	3	3	2	51	3	40128.72581	40001.27119	47.34	127.2	110.1	70	118	721.1	1	2396	2007-2008	2.436318875
48260	5	3	2	68	4	11630.61	11761.23851	33.93	109.3	90.7	72	126	953.4	2	1845	2007-2008	0.751853688
48264	5	5	2	44	2	17338.62045	17134.51102	39.85	127	97.6	76	130	1234.1	1	1770	2007-2008	2.900238183
48265	3	3	2	61	3	55604.39463	58093.44896	28.82	103.8	82.9	72	126	627	1	1521	2007-2008	3.455331366
48271	1	3	1	72	3	33102.04989	32499.82005	31.91	122	100.2	72	130	963.6	1	1367	2007-2008	0.825054768
48272	3	3	2	70	3	23231.84649	23322.71711	18.53	83	46.9	74	116	744.5	2	1859	2007-2008	1.721988156
48276	3	3	1	64	4	7237.067591	7008.320186	27.93	104.6	87.7	72	126	845.4	1	901	2007-2008	2.097576754
48277	2	2	1	67	4	8749.293574	8973.063101	34.74	115	98.4	52	112	613.5	1	1486	2007-2008	2.131610474
48278	4	4	1	74	4	9369.943317	9431.969508	28.34	98.3	86.6	54	156	603.3	2	2184	2007-2008	2.285128377
48279	3	3	2	55	2	14963.35478	14787.20686	29.64	92.8	70.3	72	126	685.5	2	1813	2007-2008	1.886434805
48282	5	5	1	69	3	52939.84105	52278.53845	25.65	98	80.9	60	118	609.5	1	2469	2007-2008	2.343001385
48284	3	3	1	64	3	17290.31078	17198.82308	27.5	101	88.8	70	120	546	1	2182	2007-2008	-2.869795309
48287	5	NA	2	40	3	105878.3535	105858.4891	28.22	92.6	77.1	62	104	812.4	1	2757	2007-2008	0.314399795
48289	2	2	2	67	3	55604.39463	56250.23217	21.11	85.5	53.3	66	124	703.6	1	1597	2007-2008	-0.195434138
48294	4	4	2	40	3	92495.8518	91834.37051	31.51	110.2	95.4	86	116	1396.2	1	1880	2007-2008	2.835390172
48297	4	4	1	53	3	77911.3396	79453.12163	27.37	99	82	82	122	728.1	1	1884	2007-2008	1.832968681
48298	3	5	1	56	3	29636.3267	30175.84826	27.67	104	86	64	110	884.2	2	2227	2007-2008	-1.875442714
48301	2	2	2	42	4	22880.99487	23619.20438	24.2	84	60.5	66	116	598.9	1	1541	2007-2008	0.878580477
48306	3	4	1	77	3	10770.17682	10920.73182	28.29	101.9	74.7	66	132	1042.8	1	1406	2007-2008	2.590038911
48307	4	5	1	40	3	87268.46482	95342.1261	30.49	103	98.8	92	132	648.5	1	2735	2007-2008	-2.387873561
48312	5	5	2	49	4	29319.44206	32043.73563	28.56	95.2	71.2	76	148	1458.6	1	1473	2007-2008	2.373077883
48313	1	1	2	72	4	11887.83355	11817.67682	22.96	100.7	63.8	68	144	911.3	1	1441	2007-2008	-2.141227955
48314	4	4	2	60	3	22354.43662	25341.14465	27.4	88	64.4	66	100	673.5	1	2020	2007-2008	0.498855825
48315	4	2	2	40	3	29322.50606	29362.82084	20.61	83.7	50.6	74	112	818.5	1	1015	2007-2008	3.750526603
48316	4	4	2	42	1	14229.23738	14061.73145	27.75	95.5	65.3	80	150	790.3	2	1011	2007-2008	3.226950686
48320	1	4	1	78	2	6745.203054	7074.718628	24.81	92.3	69.1	60	136	741.6	1	1255	2007-2008	3.451801108
48322	2	3	2	60	4	11630.61	11426.10631	22.95	82.8	57.5	78	102	635.6	1	248	2007-2008	4.147590156
48325	5	5	1	78	2	6078.549403	6284.001381	24.94	100.7	80.9	90	146	1177.5	1	1423	2007-2008	-1.946230607
48335	2	3	2	66	3	24080.99578	24360.6933	31.12	99	67.9	84	198	656.9	2	2445	2007-2008	2.899372699
48336	3	3	2	44	3	94186.41472	93512.84341	26.91	96.2	71.4	78	108	893.4	1	635	2007-2008	3.914241516
48337	5	5	1	66	5	15165.2658	15520.33433	22.09	79.5	57.2	80	150	764.8	1	1558	2007-2008	0.461033236
48346	2	2	2	68	3	59522.80391	60214.15324	28.44	106.3	76.4	64	102	896.7	1	1208	2007-2008	2.293960121
48350	4	4	2	54	4	21711.85987	23112.68042	35.08	109.8	85.8	110	158	910.6	1	676	2007-2008	2.605579154
48354	1	1	2	74	4	13104.92612	13027.58664	24.71	96.6	68	72	166	933.7	1	1877	2007-2008	3.151783773
48360	5	5	1	41	3	86049.46377	87575.47506	24.35	89.7	78.8	62	106	826.9	2	1963	2007-2008	-0.495879793
48361	4	4	2	41	3	68460.33534	68447.49112	30.52	90.9	84.9	70	120	914.9	1	2307	2007-2008	-0.992152414
48362	5	5	1	60	3	62578.75476	63087.94328	28.51	98.2	87.3	54	96	527.4	1	1363	2007-2008	0.552411243
48365	1	2	2	53	1	16965.19077	16765.47734	36.06	114.8	83.1	74	124	1191.2	2	1826	2007-2008	0.530534608
48368	5	4	1	78	3	28927.6103	29265.46795	33.92	122.2	114.7	88	140	499	1	3348	2007-2008	-1.250355287
48370	2	4	2	50	1	9900.809686	9784.257815	32.16	101.7	74.3	84	128	694.6	1	2044	2007-2008	-0.032856129
48372	5	5	1	47	3	87980.10544	89660.66518	29.32	109.6	93.2	72	126	770.3	1	3179	2007-2008	0.494537487
48374	2	2	2	50	1	14830.90284	14656.31415	21.42	77.3	57.6	62	100	856.7	1	1289	2007-2008	1.438768579
48380	3	3	2	44	3	107369.6939	108063.0236	37.02	116.8	99.2	70	100	809.4	1	2416	2007-2008	3.163867045
48391	3	3	2	64	4	10085.33989	10879.13096	24.42	87.1	56.8	72	130	837.6	2	1894	2007-2008	2.488306938
48398	2	2	2	63	4	10131.69389	9970.341104	28.97	98.5	86.2	66	134	439.1	1	1594	2007-2008	2.145457881
48401	4	NA	2	60	3	72259.67752	76464.46638	28.07	96.7	79.4	80	110	1235.5	1	1492	2007-2008	-0.610428486
48408	1	5	1	66	2	5524.575822	6270.390087	26.6	94.4	66.4	90	170	784.6	1	1404	2007-2008	2.85351663
48413	3	3	1	63	3	19360.58776	18941.79548	29.26	101.9	89.3	102	148	604.1	1	2591	2007-2008	-2.354348706
48414	4	4	2	58	3	30582.71342	30485.5783	33.95	119	83.8	60	118	1329	1	1189	2007-2008	2.382118948
48415	3	2	2	49	4	53362.24042	53996.812	27.71	94.5	81.8	76	108	1216.4	1	1520	2007-2008	2.430795155
48423	3	4	2	63	1	7277.593295	7177.028352	46.27	122	111.6	74	150	1149	2	1830	2007-2008	2.202851166
48427	4	4	1	63	3	16338.94193	20384.26634	28.6	101.4	80.9	84	154	769.3	1	3262	2007-2008	0.992178791
48433	5	4	1	74	3	28153.11442	28102.55699	32.18	118.7	111.7	66	128	1101.7	1	1733	2007-2008	-3.253600944
48438	4	5	2	54	1	13738.36182	13576.63447	23.87	87.6	63.2	68	118	623.6	1	738	2007-2008	3.543706919
48446	1	1	2	48	3	32799.69748	33011.49844	21.36	78.3	58	60	98	647.2	1	2722	2007-2008	-0.198826645
48451	2	2	2	61	3	22473.38602	23428.36561	34.75	119.4	110.6	94	194	770.2	1	1521	2007-2008	0.474086008
48452	2	4	1	51	4	19637.94688	20676.67977	18.7	78.5	62	68	136	1186.1	1	6786	2007-2008	-3.583159067
48453	2	3	2	69	3	72259.67752	73409.41651	29.47	104.7	74.6	66	128	710.1	1	2187	2007-2008	1.73016677
48455	1	1	2	72	3	23231.84649	22582.72277	35.67	104.5	90.3	82	140	1051.4	1	1406	2007-2008	2.292006756
48458	3	4	2	51	4	21630.05297	22368.06842	31.64	106.5	90.7	74	134	434	1	860	2007-2008	4.406140852
48461	3	1	1	46	1	16781.26083	17272.4328	25.8	97.7	83.6	52	100	466.7	2	3093	2007-2008	1.341155096
48466	1	1	1	79	3	34961.87448	34680.53154	26.23	100.2	76.8	82	158	688.3	1	1814	2007-2008	0.50972806
48471	2	3	2	67	3	69052.17791	70576.08309	28.27	104	76.3	78	136	1095.8	1	1146	2007-2008	3.194877323
48473	1	1	2	53	1	10723.61386	12668.11864	30.25	102	76.1	62	124	832.6	2	1413	2007-2008	1.811176119
48491	2	2	2	43	2	23522.51993	23245.61392	30.07	92.2	70.4	74	124	1131.9	2	1147	2007-2008	1.839887531
48492	4	4	1	69	4	6019.815072	6097.936489	36.6	134.3	127.3	74	128	1075.8	1	1272	2007-2008	1.58579108
48495	5	5	2	57	3	120732.4204	120348.9568	32.94	113.3	83.8	72	126	1069.7	2	2026	2007-2008	-0.485789837
48501	2	2	2	76	3	31860.18762	34106.14387	28.95	92.2	74.4	60	136	562.6	1	1334	2007-2008	3.445495469
48502	5	5	1	57	3	78564.67164	78708.32167	26.91	100	84.6	66	142	567.2	1	2109	2007-2008	-2.066141184
48503	3	3	1	58	3	24855.92551	25308.42112	29.59	112.8	94.5	90	146	855.6	1	1205	2007-2008	-0.701311833
48504	2	2	2	70	3	25886.26323	27711.09287	20.78	76.4	52	60	140	505.6	1	917	2007-2008	3.478445559
48508	4	3	2	46	2	18215.60991	21518.63266	29.13	94.4	71.8	76	108	1195.2	2	1505	2007-2008	2.714235866
48513	5	5	2	61	4	9037.014557	9789.813124	27.88	87.5	75.8	78	122	861	2	1263	2007-2008	3.397702965
48515	5	5	2	42	3	57706.00502	59882.57514	29.65	95.4	81.9	58	104	936.9	1	1937	2007-2008	1.215199244
48518	5	5	1	54	3	90152.23216	91793.42992	25.54	102.1	87.6	82	114	836	1	1815	2007-2008	1.274631462
48522	4	4	2	64	3	59522.80391	60214.15324	19.86	64	46	68	116	531	1	2072	2007-2008	-0.677736366
48524	4	4	1	46	1	21123.01512	22653.31714	36.86	120.6	113	82	114	315.2	2	4412	2007-2008	-1.581903245
48526	1	NA	1	44	1	21806.12294	23070.99287	24.2	92.6	66.6	76	114	734.6	2	2363	2007-2008	2.185051353
48531	5	5	2	69	4	12310.32993	12595.28535	24.54	91.5	67.3	68	144	791.2	1	482	2007-2008	3.071193002
48532	2	2	1	69	4	6852.086052	6704.07838	22.62	82.1	71.1	70	122	1329	1	1731	2007-2008	0.657060541
48538	4	4	1	47	1	18303.71976	18839.4527	35.54	114	99.7	94	122	808.8	2	2312	2007-2008	0.243114833
48552	5	5	2	52	3	89748.14518	90689.35381	21.22	83	65	84	114	539.1	2	1346	2007-2008	-3.220965302
48553	4	4	1	62	4	7750.960967	7944.069793	21.02	88.8	57.1	82	132	583.7	1	2979	2007-2008	0.607329036
48554	1	3	2	58	1	16669.37259	17217.61098	26.62	91.4	64.2	76	134	708.4	1	844	2007-2008	2.929997398
48557	1	2	1	70	2	4697.309535	5249.821776	23.99	92	63.9	68	116	834.6	1	2299	2007-2008	-2.306139161
48558	4	4	1	51	1	17857.8236	19151.57184	28.97	101	80.6	78	126	708.2	2	2429	2007-2008	-2.162438915
48561	2	2	2	78	3	23231.84649	28796.84135	40.24	113	103.8	56	166	678.5	1	294	2007-2008	4.023020075
48562	5	3	1	76	3	30052.77379	37625.23149	27.47	104.5	91.8	48	124	509.6	1	2798	2007-2008	-0.602083259
48565	2	2	1	53	3	24672.29151	24717.40308	28.76	110.7	96.1	90	140	1268.1	1	2374	2007-2008	2.780835648
48567	1	4	1	60	4	5689.981299	6216.8105	20.6	73	60.8	66	146	765.3	2	1641	2007-2008	1.176623608
48569	5	5	2	46	3	82023.23072	85297.90368	25.59	88.9	70.1	64	106	1046.4	2	1840	2007-2008	0.631607092
48571	1	4	1	50	2	14772.34746	14808.85681	28.47	96.2	79.2	82	154	1238.5	2	2628	2007-2008	0.734045066
48576	3	3	2	67	3	25164.265	26233.59026	32.27	105.7	72.8	80	128	757.2	2	1676	2007-2008	3.042142338
48586	4	3	2	44	3	96068.40426	98806.51309	26.28	101.8	67.2	84	108	951.9	1	753	2007-2008	1.832242578
48588	1	2	2	66	1	5782.233038	6330.883352	23.46	81.5	48.3	64	96	628.9	1	1056	2007-2008	3.976409851
48589	4	4	2	55	4	22105.5051	22859.74293	47.71	123.1	115.8	82	144	1156.3	1	1377	2007-2008	0.707912832
48592	4	3	1	51	3	89799.91034	93154.65019	33.49	120.5	111.9	84	146	708.1	2	3293	2007-2008	-1.808701847
48594	1	1	2	68	1	8975.577102	9224.483217	31.71	107.2	75.7	68	144	436.9	1	1656	2007-2008	1.983221543
48596	5	5	1	61	3	59034.20809	61128.33151	40.12	129.6	119.1	76	120	917.2	1	2511	2007-2008	2.31021052
48597	2	2	1	60	3	15165.2658	15222.8119	34.77	124.4	112.9	72	142	719	1	2169	2007-2008	-1.474398461
48600	4	4	2	44	2	27235.08739	26914.47721	27.7	97.2	66.2	58	110	502	1	951	2007-2008	2.435850995
48605	5	5	2	52	3	29941.78607	30103.00281	43.14	126.2	100.2	64	106	764.3	2	1353	2007-2008	2.631065649
48606	1	1	1	53	1	10385.54626	10691.95915	27.18	94.4	68.8	80	134	875.4	2	2628	2007-2008	2.862924599
48609	3	3	1	77	3	7311.857854	7295.372153	28.19	107.2	78.8	58	114	638.7	1	1882	2007-2008	1.369799104
48610	2	2	2	43	4	28558.83099	28439.53401	33.94	113.3	101.1	70	100	570.8	2	1760	2007-2008	1.454716496
48611	5	5	1	44	5	149088.2949	155643.4955	29.94	97.1	84.9	80	122	1166.3	2	1803	2007-2008	2.468925755
48616	4	4	2	62	3	24057.07243	24336.49208	26.37	96.7	78.2	88	146	639.6	1	1249	2007-2008	3.291745385
48617	5	5	2	76	3	32611.65412	32664.96884	20.93	89	56.5	54	128	790.2	1	2659	2007-2008	-3.349383126
48621	1	1	2	40	1	17735.22107	17999.05517	23.99	84.9	60.5	66	108	749.3	2	1864	2007-2008	-0.146454603
48623	5	4	1	62	3	52939.84105	51794.69002	26.37	102	93.1	86	166	741.7	1	2275	2007-2008	1.3723181
48626	4	2	2	52	3	96663.55644	96356.53903	32.71	98.8	82.8	82	118	571.5	2	557	2007-2008	1.950374867
48632	3	3	1	73	3	8967.720532	8978.098382	32.77	118.1	117.3	70	134	1013.2	1	2497	2007-2008	0.753913766
48633	1	1	2	79	1	10626.05894	12749.52363	27.15	102	69.6	74	178	890.6	1	1493	2007-2008	2.994156838
48636	2	2	1	51	4	20345.89528	20526.88923	25.29	100.7	71.9	108	204	365.5	1	1441	2007-2008	3.115068847
48640	1	1	1	51	2	10981.23254	11008.37228	22.93	90	71.6	80	120	670.3	2	656	2007-2008	2.554056463
48642	3	1	1	53	2	9970.337025	9994.97837	28.37	97.4	85.1	66	114	1915.7	2	2095	2007-2008	1.37876455
48643	4	4	2	79	3	39806.31553	39871.39236	34.43	114.9	78.6	54	130	1222.9	2	1250	2007-2008	2.665763157
48644	5	5	1	40	3	79880.95138	81406.80441	24.92	93	73.8	64	108	1153.9	1	2331	2007-2008	-0.081165555
48646	3	3	1	56	3	21732.73621	21772.473	50.81	155.4	155.6	92	134	825.1	1	4802	2007-2008	-0.429640665
48647	2	2	1	44	4	23966.45196	23833.63633	26.44	98.5	83.2	90	120	684.9	1	554	2007-2008	3.69821151
48648	2	2	1	61	4	6341.897876	6251.674872	21.89	81.2	64.3	70	122	899.1	1	737	2007-2008	3.956187538
48649	2	2	2	40	1	23849.4058	23568.65171	27.22	100.4	78.1	70	116	514.2	2	2035	2007-2008	0.903398211
48655	4	5	2	61	2	5583.541525	5667.89019	23.6	86.8	58.4	68	112	1043.5	1	1647	2007-2008	0.64692971
48657	3	3	2	75	2	9634.105961	10866.99229	27.98	111.6	64.4	64	162	476	1	1550	2007-2008	1.610056155
48659	4	4	2	60	3	46176.02278	48863.00441	30.84	90.2	85.2	80	132	694.1	1	1016	2007-2008	0.178854502
48666	4	4	2	75	3	26442.35424	32145.48431	24.58	92.8	79.2	74	124	624.8	1	1730	2007-2008	-1.859981237
48670	3	3	2	72	3	31860.18762	31487.21337	28.65	99	74	80	130	639.7	2	2250	2007-2008	-2.028764398
48671	3	2	1	74	3	38415.16002	42085.28344	29.54	107.3	88.5	46	140	795.2	1	2509	2007-2008	1.995365872
48690	4	2	2	48	1	13661.78819	13500.96226	38.03	106.8	81.5	78	132	848	2	1243	2007-2008	2.917216343
48691	5	5	1	56	4	21097.15018	21246.8262	22.96	80.7	73.4	64	124	619.2	1	1448	2007-2008	2.548167643
48701	4	4	1	49	3	101958.5018	105554.3466	26.79	99	87	80	118	980.7	2	1731	2007-2008	1.414758818
48704	4	NA	2	71	1	8873.656757	9595.5433	27.67	93.8	65.7	68	140	736.2	1	1417	2007-2008	-0.491798457
48705	2	2	1	60	4	7237.067591	7146.446751	24.66	90.5	75.6	72	128	681	1	1645	2007-2008	1.740184651
48710	4	4	1	68	3	78642.9204	76941.78153	29.43	111.1	88.4	82	160	971.1	1	1768	2007-2008	1.930593162
48715	1	3	2	73	1	11249.14549	13497.12504	27.65	103.9	65.5	78	158	688.7	1	790	2007-2008	2.770696413
48716	3	3	1	53	5	76861.66606	77918.37301	26.52	99	73	86	158	951	2	2087	2007-2008	-0.669543202
48730	2	2	2	44	3	36632.62365	36370.64655	27.51	98.1	78.1	74	116	633.4	1	1986	2007-2008	1.98981219
48731	4	4	1	72	3	9935.266183	10243.6676	27.68	107.7	77.1	58	106	1009.5	1	2538	2007-2008	-1.179670737
48740	2	1	2	64	4	12310.32993	12114.28118	26.66	99.7	71.8	80	124	620.4	1	672	2007-2008	3.774235558
48744	1	1	1	60	3	20889.05522	20437.20038	21.94	90.5	76	92	124	609.5	1	1667	2007-2008	2.384924875
48751	3	5	2	52	1	11163.52508	11330.11148	38.4	115.2	96.6	74	92	719.6	1	1141	2007-2008	3.810255205
48763	3	3	2	77	2	8568.447729	9664.960689	28.8	100.7	NA	64	134	809	1	728	2007-2008	2.613264494
48765	3	3	2	54	5	27909.12082	27820.47742	34.52	111.3	93.4	64	124	669.1	1	1470	2007-2008	1.653426139
48766	4	4	2	59	3	76996.47137	77290.25857	32.01	103.2	83.7	78	118	533.4	1	1521	2007-2008	0.360007138
48786	3	3	1	69	3	18527.15477	18126.39062	41.92	145.6	141	86	132	530.7	1	2204	2007-2008	2.145107818
48788	5	4	2	60	3	59522.80391	60214.15324	47.17	128.8	123.8	44	150	771.2	1	948	2007-2008	2.659492381
48790	4	4	1	45	4	28456.58978	28298.89101	28.85	102.4	96.6	92	140	663.8	2	2014	2007-2008	2.037040225
48796	2	2	2	77	3	26899.31618	26572.19661	31.9	102.3	73.7	74	180	852.6	1	596	2007-2008	3.013813643
48800	3	3	2	42	3	65721.67813	65251.67153	25.04	86.4	73.9	70	114	1348.3	2	1363	2007-2008	0.453721825
48801	4	4	1	47	3	87268.46482	95342.1261	29.2	101.3	84.8	70	114	720.8	2	2316	2007-2008	3.17970736
48803	5	5	1	57	3	93268.33496	97565.80036	25.5	104.5	82.8	84	110	1141.3	2	2262	2007-2008	-4.45394166
48805	3	3	2	66	3	59356.35643	70522.67704	33.68	104.3	80.8	66	166	454	2	932	2007-2008	3.912656102
48817	5	5	2	42	3	82023.23072	85297.90368	31.38	102.4	84.6	70	120	1143.4	1	1916	2007-2008	1.408420092
48821	5	5	2	51	1	16008.82123	15820.36613	41.26	129.6	112.6	64	122	1160.3	2	1173	2007-2008	2.384019686
48823	5	5	2	60	3	59522.80391	61219.80021	29.69	104.1	78.4	64	126	727.9	1	1873	2007-2008	0.397974189
48826	3	3	1	71	3	13936.38132	16070.24291	33.69	124.7	112.2	64	148	469.6	1	1859	2007-2008	0.213680869
48827	5	1	2	54	3	40406.8457	40278.50772	36	136.9	101	78	142	1157.8	1	1687	2007-2008	2.567319795
48830	4	4	1	45	3	41804.82014	41796.86917	39.07	120.4	119.1	110	154	741.3	1	2049	2007-2008	4.199230814
48833	2	2	2	71	3	36091.21173	38635.43035	32.09	115.3	92.3	64	110	621.2	1	1241	2007-2008	2.040305933
48844	4	4	1	62	3	45546.01138	45916.6085	32.2	107.7	98.4	72	134	1135.6	1	2380	2007-2008	0.971022396
48846	1	1	2	51	1	15324.08062	15828.07375	29.8	91.3	75.8	66	124	927.4	2	690	2007-2008	3.76205439
48851	2	3	2	60	1	4165.506946	4225.963772	46.1	121.6	100.3	64	142	1033.7	1	1752	2007-2008	1.760619025
48853	4	4	1	59	3	83459.20123	83611.80056	29.33	105.3	100.5	86	122	614.4	1	2497	2007-2008	1.770024714
48859	2	2	1	65	4	9938.910884	9780.42001	29.57	109.1	104.4	72	134	723.4	2	1484	2007-2008	1.566258627
48860	1	1	1	79	3	8872.862854	8711.437723	25.61	102.6	77.8	50	126	616.6	1	2854	2007-2008	-0.007843639
48864	4	4	2	60	2	7294.599204	7932.534468	33.93	109.7	88.4	66	164	1367.1	1	1080	2007-2008	-0.251139343
48866	5	5	2	53	4	25939.85942	28120.69158	28.08	93.3	75.8	72	118	717.7	2	1262	2007-2008	-0.500561473
48884	3	3	1	60	4	9511.841767	9250.313976	29.81	102.1	91.7	80	126	989.9	1	1958	2007-2008	-1.34039633
48886	5	3	1	66	3	48247.05492	48639.62979	26.75	97.7	89.2	62	110	551.7	1	1655	2007-2008	0.81263219
48887	2	2	1	72	4	10181.51229	10854.10805	25.81	94.4	83.8	84	150	1386.2	1	1087	2007-2008	2.83709613
48889	5	5	1	59	2	10385.54626	10689.52158	26.89	94	69	66	114	1405.9	1	2482	2007-2008	-0.130503415
48891	3	4	2	42	3	35607.13922	35352.49584	22.48	80.4	56.9	80	122	786.1	1	1447	2007-2008	2.717192175
48922	3	3	1	40	3	106208.0046	108580.2288	31.55	108.5	99.4	58	88	678.6	1	1232	2007-2008	-1.034662717
48924	5	4	2	62	3	45821.89946	48488.27466	34.11	112.7	90.3	86	134	727.8	1	1361	2007-2008	3.589023088
48927	1	1	1	67	1	9107.121547	10083.14326	23.33	101.8	71.7	54	120	500.6	2	2162	2007-2008	1.553817025
48932	1	1	1	58	2	14772.34746	14808.85681	27.7	104.2	71.8	66	132	835.2	2	877	2007-2008	2.694649
48934	1	3	1	57	1	16143.00808	17312.52284	25.14	95.5	68.2	82	140	534.5	2	1501	2007-2008	0.999341301
48941	4	4	2	47	3	80582.49423	84824.83331	18.3	74.7	46.1	58	110	916	2	817	2007-2008	3.653670997
48948	4	4	2	64	3	45831.35485	46363.67985	20.57	83.7	57.1	68	134	792	1	1560	2007-2008	-2.509583078
48949	4	4	1	51	3	24155.22992	25217.67622	30.7	111.3	102.8	62	124	1049.4	1	657	2007-2008	3.303975181
48951	4	4	2	64	1	5389.258636	5860.565974	30.39	87.7	63.2	68	104	941.1	2	1131	2007-2008	2.200096788
48953	3	1	2	56	3	30689.92908	32532.99699	42.71	122.6	111.4	70	154	597.9	1	1727	2007-2008	0.535512875
48957	5	5	1	66	3	48573.9427	47523.23118	25.48	98.6	78.4	60	104	902.2	1	3052	2007-2008	-1.008615194
48962	2	2	1	64	5	63205.758	67197.68925	34.61	125.4	100.6	72	106	579.8	1	1698	2007-2008	1.083288474
48964	3	3	2	68	3	53804.7637	69407.19311	27.23	102.9	74.4	64	114	551.9	1	1240	2007-2008	-0.395623544
48965	1	1	1	42	2	24674.8736	26462.49761	29.37	98.4	70.2	86	132	883.9	2	2686	2007-2008	-1.854198027
48968	2	1	2	51	1	18454.55483	18237.30867	52.74	144.1	115.2	44	144	984.8	1	2200	2007-2008	0.94845817
48971	3	3	2	44	1	20703.80231	20460.07811	26.22	83	68.8	68	120	821.2	2	593	2007-2008	1.571574464
48974	3	NA	2	57	4	20877.42148	21589.75721	34.23	103	79.2	56	100	429.9	1	600	2007-2008	3.808211514
48987	2	1	2	49	1	23849.4058	23568.65171	19.21	77.6	47.9	66	116	629	2	1794	2007-2008	1.817752323
48991	4	4	1	66	4	5593.729556	5416.924364	26.16	91.4	70.8	70	148	913.7	1	1318	2007-2008	2.820387488
48993	5	5	2	47	4	24223.25804	24122.07178	20.58	79	59	62	92	971.6	2	2360	2007-2008	0.788625301
49000	5	5	2	63	3	62262.25635	64037.3545	29.2	101.8	69.6	60	122	512	1	1317	2007-2008	0.686652315
49001	1	1	1	76	1	6078.549403	6626.962524	30.75	111.7	75.4	54	138	1283.1	1	1323	2007-2008	1.898236309
49003	5	5	1	71	3	45016.76625	46777.45148	32.74	115.4	88.7	76	124	598.1	1	954	2007-2008	3.478224227
49004	5	5	2	72	5	37685.56108	38319.16173	21.97	100.7	49.1	58	134	999.8	1	670	2007-2008	1.8243001
49008	3	3	2	61	4	12310.32993	12093.14385	31.45	107.9	80.5	78	136	706.9	1	1842	2007-2008	3.163929602
49009	1	1	1	52	1	17560.19321	19280.38663	28.6	108.6	85.6	62	108	739.8	1	1262	2007-2008	1.304519035
49012	2	2	2	44	4	25458.24827	25351.90316	40.96	143.1	122.3	90	138	713.2	1	1396	2007-2008	1.910025941
49013	4	3	1	62	4	7237.067591	7008.320186	26.17	101.6	88.2	70	158	348.1	2	1793	2007-2008	0.784073493
49021	1	NA	1	52	2	10271.09485	10866.87242	27.71	89.5	73.9	72	114	966.9	2	1153	2007-2008	3.205022235
49028	5	5	1	60	4	10497.32436	10758.85658	21.54	84.7	72.3	74	122	1835.6	1	1224	2007-2008	2.282696419
49035	5	5	2	60	3	66189.38454	70040.9432	36.67	112.9	101.4	78	146	1509.5	1	2362	2007-2008	-0.413118961
49040	5	5	1	62	3	38694.44899	39009.29657	32.83	107.5	97.7	84	130	854.5	2	1528	2007-2008	0.92376709
49045	2	1	1	40	1	23561.09053	24686.74718	32.8	116.2	96.8	76	130	487.7	1	3733	2007-2008	-0.181424287
49050	5	5	1	61	3	79310.13534	78319.42593	30.31	115.6	102.3	98	156	745.6	1	1256	2007-2008	0.392317626
49052	4	5	1	53	3	95228.96425	97552.52685	23.64	87	79.7	68	126	834.5	1	3119	2007-2008	-2.557278469
49053	2	2	1	63	2	5502.014875	6358.637245	26.97	97.9	75.4	78	124	1145.1	1	1827	2007-2008	2.845135478
49056	5	5	2	62	1	4625.711085	5613.956214	29.39	84.9	74.3	66	124	851.6	2	1724	2007-2008	0.731546497
49058	2	2	1	51	2	14772.34746	15296.6702	24.79	93.2	71.9	82	164	771.3	2	1831	2007-2008	2.283327802
49061	4	4	2	76	3	42969.40373	43039.65169	24.17	85.6	61.8	60	136	477.5	1	1257	2007-2008	0.087897211
49062	4	4	1	47	3	72445.23626	72431.45769	23.5	89.2	77.5	70	110	509	2	3334	2007-2008	-0.245546135
49066	5	5	1	60	3	61019.91492	62448.59093	21.89	91	74.1	72	120	1219.4	2	1978	2007-2008	-0.047071009
49067	2	2	2	60	4	10410.69139	10981.48653	33.81	98.6	84.2	58	126	957.9	1	1199	2007-2008	2.859585392
49069	2	4	1	58	2	8616.625474	9116.435113	27.8	99.3	74.5	58	106	887.7	1	2868	2007-2008	-0.067390281
49071	3	3	1	76	3	36585.86668	36072.80928	27.82	112.6	85.5	72	120	919.7	1	1467	2007-2008	-0.134984135
49075	4	4	2	63	4	9560.867353	10357.30374	35.49	107.9	93.6	72	132	474.6	1	1388	2007-2008	2.235370637
49077	1	1	1	79	4	11283.6325	11475.70369	27.07	82.1	70	68	168	180.3	1	1269	2007-2008	3.499723858
49078	4	5	2	45	3	80250.36656	82537.63509	24.36	82.4	63.7	86	118	960	1	1553	2007-2008	3.295203236
49087	5	5	1	63	3	16724.31843	17317.58101	38.95	134.6	133.6	86	132	1138.7	1	820	2007-2008	2.880449507
49095	4	4	2	66	3	59522.80391	60214.15324	36.28	119.9	101.3	84	128	924.5	1	1538	2007-2008	-1.193630335
49098	2	2	1	56	3	28007.97442	29298.47994	26.39	91.5	84	68	132	1065.7	1	1329	2007-2008	1.847581207
49103	4	4	2	51	1	12261.11231	12116.77506	19.76	75.2	51.6	74	102	670.7	2	1600	2007-2008	-0.052049862
49105	4	4	1	69	4	6009.670477	5819.718329	24.38	85.6	68.4	62	108	994.4	1	1745	2007-2008	-0.021152257
49106	4	4	2	65	3	27908.51802	33158.76381	36.65	122.9	94.3	70	152	866	1	1337	2007-2008	-0.466166888
49109	4	4	2	45	4	28425.71691	28306.97598	44.15	134.5	122.4	76	150	1194.1	1	3051	2007-2008	0.067297073
49113	2	2	2	71	4	10887.00754	12561.48983	30.28	99	66.6	64	116	1317.7	1	1578	2007-2008	0.369340064
49114	3	3	1	41	4	28456.58978	30702.71732	27.84	91.1	88.2	78	114	1519.3	2	2834	2007-2008	2.740514219
49116	5	5	1	74	3	28004.10278	28760.48272	21.92	89.6	67.2	56	110	1347.9	1	1995	2007-2008	-2.976956577
49117	4	4	2	45	3	79169.18009	82329.90871	27.97	92	76.6	98	142	896.8	2	2429	2007-2008	2.486556432
49120	3	3	2	60	3	55604.39463	57967.2367	21.47	90.4	61.4	68	156	403.4	1	1399	2007-2008	1.127882148
49121	1	1	1	71	2	9073.888819	10326.0804	30.9	115.8	82	74	138	754.1	2	685	2007-2008	2.993213576
49123	5	5	1	45	3	115338.8957	117384.3292	33.26	107.6	102.8	78	108	955	1	2953	2007-2008	-0.990331061
49127	5	5	2	42	3	133946.3508	132988.4375	40.76	114.8	109.9	72	134	746.3	1	948	2007-2008	1.773471969
49131	5	5	1	68	3	49593.47222	48520.70708	27.35	91.4	89.7	70	118	476.4	1	2114	2007-2008	0.185142984
49134	4	4	1	40	4	14319.70782	14104.17345	41.91	119.6	130.7	72	106	718.3	2	1279	2007-2008	2.87299718
49136	3	3	1	52	4	23033.65041	23053.04347	24.08	88.9	82.4	66	104	1572.2	1	2277	2007-2008	-2.560486716
49137	5	4	2	68	3	55604.39463	59070.98629	41.12	105.2	105.4	72	118	779.5	1	2224	2007-2008	-1.351556517
49146	5	5	2	67	3	72091.21844	76286.20467	23.81	78.6	62.5	68	110	1009.5	1	1932	2007-2008	-1.364420176
49147	1	1	2	64	1	6681.804407	7046.153259	28.8	100.7	NA	78	154	864.2	2	1063	2007-2008	3.925521204
49149	3	3	1	69	3	47908.54622	51144.04042	26.16	93.4	76.4	72	126	711.5	1	1672	2007-2008	-1.90015188
49150	3	3	2	61	3	55604.39463	58093.44896	25.94	101	71.4	60	114	894.3	1	1318	2007-2008	1.197814685
49157	5	5	2	49	3	65721.67813	65251.67153	25.44	84.9	65.2	82	130	907.5	1	2801	2007-2008	-1.84276307
49160	5	5	2	65	3	65649.87432	69470.0389	25.61	91.1	67.8	50	124	520.7	1	1311	2007-2008	0.36406828
49161	1	1	1	55	4	26633.09563	27192.14344	26.29	89.2	83.1	72	134	666.1	1	840	2007-2008	1.294678872
49166	2	2	2	73	3	20747.60595	20783.50754	31.2	103.4	77.6	58	96	932.2	1	1043	2007-2008	2.739511653
49172	4	4	2	65	3	49537.20463	56155.7193	26.33	96.2	76.9	68	132	1525.7	2	1420	2007-2008	0.444005452
49177	2	2	2	63	1	5604.659005	5686.00322	43.14	127	106.6	72	120	1367.8	1	1061	2007-2008	1.346663199
49180	3	3	1	52	3	88652.04238	88814.13646	28.41	104.7	87.2	76	120	1231.6	2	1647	2007-2008	3.243623179
49184	1	1	1	44	2	17164.15044	18845.54758	22.61	76.5	58.6	72	114	1086.5	2	2038	2007-2008	1.845659504
49187	2	2	1	76	3	8859.280057	8924.147658	27.88	103.4	75.9	72	118	565.7	1	1642	2007-2008	3.650631966
49189	3	3	1	41	3	93356.71066	97013.11872	30.73	105.7	93.9	82	114	836.8	1	2279	2007-2008	3.499388115
49193	4	4	1	64	1	9618.801295	9947.063398	32.63	104	89.7	82	150	747.5	1	3144	2007-2008	-1.551454594
49194	5	5	1	41	4	31471.34259	31497.83972	33.47	103.7	99.7	100	126	935.8	1	1870	2007-2008	-0.725139345
49196	1	1	2	71	2	7011.886086	7378.688705	34.94	114.6	78.4	42	116	1113.4	1	813	2007-2008	3.614882459
49198	1	1	1	79	3	9471.568094	9299.250643	20.23	80.1	54.8	62	108	430.6	1	1703	2007-2008	2.688699061
49201	3	3	1	62	3	54670.91934	54542.52121	28.15	108.1	90.8	78	126	647.8	2	2152	2007-2008	0.838880812
49212	5	5	1	77	3	7782.35425	7640.768882	25.66	93.6	68	58	130	536.3	1	1468	2007-2008	2.479739467
49219	2	2	2	72	3	20747.60595	20167.89468	37.75	112.3	100.3	68	118	1146.4	1	2407	2007-2008	2.166713054
49220	1	1	2	52	5	22920.71652	23747.29489	20.11	71	44.7	92	124	851	2	1206	2007-2008	0.665628985
49222	2	NA	2	45	5	65721.67813	65251.67153	26.06	91.5	63.5	80	128	469	1	1337	2007-2008	2.683064936
49228	4	4	1	52	2	9420.987534	10365.10814	28.32	95.1	73.4	64	114	988.4	1	2097	2007-2008	1.026644632
49230	1	1	2	49	2	21624.14872	21369.59025	29.58	95.3	64.7	86	136	822	1	1372	2007-2008	1.070176628
49235	1	1	1	40	2	18417.71186	18750.61831	31.12	110.9	105	100	134	891.6	2	3036	2007-2008	-2.69162161
49242	3	3	1	62	3	20581.73705	20222.05006	26.42	103.5	78.7	72	128	505.6	2	1018	2007-2008	2.972852557
49243	1	1	2	62	3	28534.42005	28865.84349	22.88	82.1	59.6	54	114	802.9	1	1483	2007-2008	1.82573448
49247	5	4	2	74	3	40924.77153	39781.28773	32.25	112	85.9	0	144	713.5	2	1684	2007-2008	2.001888946
49250	3	3	2	65	4	11494.14765	11111.65875	20.96	85	52.8	70	124	570.4	1	1691	2007-2008	-1.230557701
49253	4	4	1	40	1	26084.33129	27974.06647	41.11	124.8	130.1	74	120	1725.8	2	4382	2007-2008	-1.588071545
49254	1	1	2	49	4	29319.44206	29668.10217	40.54	127	106.8	54	100	757.5	1	463	2007-2008	4.059051382
49256	3	3	1	58	3	25211.30734	27716.51575	27.42	105.4	85.9	78	142	827.7	1	1506	2007-2008	2.577797582
49259	1	3	2	45	3	122442.4546	121566.811	24.16	85.6	62	84	138	826.8	2	975	2007-2008	3.869100729
49262	4	4	1	44	3	94759.283	94741.26046	27.16	105.4	88.3	60	118	768.3	1	1548	2007-2008	-0.310832091
49265	1	2	2	46	1	18487.10206	19095.12369	22.46	80.7	53.9	88	162	1133.3	1	2310	2007-2008	0.027428765
49266	1	2	2	70	2	6340.396598	7434.598199	33.82	104.5	75.8	68	212	1002.1	1	1998	2007-2008	1.658366551
49268	3	3	1	42	3	105896.5389	107774.5205	36.08	122.2	117.8	78	120	517.7	2	1863	2007-2008	-0.088805738
49271	3	3	1	55	5	125286.0875	131058.8144	23.48	88.2	59.8	80	118	1065.5	2	1226	2007-2008	2.310152594
49272	5	NA	2	60	3	70866.54257	74990.26494	23.31	82.9	59.6	72	146	508.2	1	1218	2007-2008	0.424634069
49280	5	5	2	52	4	20877.42148	22224.40517	40.65	124.4	107.2	70	102	896.7	2	1927	2007-2008	-0.413099787
49281	5	5	1	68	3	58553.01978	60630.07398	22.52	91.4	72.4	74	130	883.2	1	3130	2007-2008	-2.447199579
49285	2	2	2	64	3	65649.87432	67486.43767	27.96	99.5	75.2	68	142	725.7	1	1411	2007-2008	1.907032174
49289	5	5	2	43	3	79169.18009	82329.90871	19.49	69.2	45.1	76	116	980.5	1	1833	2007-2008	0.815026233
49292	5	5	2	60	1	8030.083171	8151.390909	25.39	81	59.9	74	116	769.5	2	2002	2007-2008	1.638815234
49295	1	1	2	79	4	13260.51216	13418.857	31.26	98.4	84.6	58	132	405.9	1	1044	2007-2008	0.436779061
49297	3	3	2	50	1	14000.79352	14209.71873	41.03	115.7	90	74	112	661.8	1	961	2007-2008	1.4393879
49299	4	4	1	51	4	31658.20801	32322.73655	29.18	105.5	93.6	66	110	1601.7	2	1254	2007-2008	1.625395784
49303	5	5	2	47	4	53362.24042	53996.812	22.64	85.9	70.6	52	104	1180.4	2	1588	2007-2008	0.939616176
49306	2	4	2	40	3	39298.75136	39017.70752	38.51	113.3	103.7	78	114	1419.3	1	2479	2007-2008	2.630606094
49307	5	5	2	64	3	72091.21844	75147.47891	32	108.5	86.8	68	128	725.3	1	1997	2007-2008	1.607993637
49312	3	3	2	51	4	24391.75044	24289.86034	31.71	108.2	92.4	80	108	758.2	1	1276	2007-2008	3.351875193
49316	3	4	2	46	3	105878.3535	105858.4891	24.08	83.2	59.2	66	110	1369.6	2	814	2007-2008	3.150492826
49321	5	5	1	58	5	27201.67371	29904.66174	20.25	82.3	59.7	76	114	881	2	2476	2007-2008	-1.539065876
49323	2	2	2	73	4	11192.02236	12913.41763	38.85	112.5	94.3	64	118	705.8	1	1276	2007-2008	2.629986236
49324	1	4	1	58	1	16143.00808	17312.52284	27.2	103.7	81.5	96	164	1676.7	2	1943	2007-2008	1.378041401
49329	4	4	2	44	4	25200.90593	26013.96272	46.66	123.4	127.5	64	132	968.7	1	2553	2007-2008	-1.282125065
49331	2	2	2	65	4	15785.30361	17711.62046	27.77	92.5	66.8	54	222	702.1	2	861	2007-2008	3.102846319
49334	1	1	2	51	2	16965.19077	16765.47734	43.88	129	110.1	74	124	782.9	2	1733	2007-2008	3.850331702
49335	4	NA	2	51	1	16965.19077	17218.35185	30.26	97.2	74.4	70	122	1005.1	1	2602	2007-2008	-0.000205264
49338	1	1	2	53	1	10914.49454	11074.33629	26.02	85.6	60.9	52	88	1146.8	1	2659	2007-2008	2.429916026
49339	5	5	2	61	2	7153.962525	8682.347781	22.76	80.4	57.4	74	140	1187	1	754	2007-2008	2.989975751
49341	2	2	1	47	3	87980.10544	89660.66518	34.94	119	108.1	68	116	560.4	1	2692	2007-2008	0.062358181
49348	5	5	2	41	4	24764.43774	24660.99084	23.52	83.2	66.3	84	138	1991.7	1	968	2007-2008	2.49496414
49349	4	4	2	46	3	24000.01848	23828.38307	35.77	108.2	102.9	72	116	1069.8	1	1460	2007-2008	2.108026282
49359	5	4	2	42	4	25712.83076	25605.42219	30.05	96.5	83	90	128	769.2	2	1532	2007-2008	-0.660594031
49363	5	5	1	62	3	52939.84105	51794.69002	23.3	92.5	79.4	72	116	579.4	1	1307	2007-2008	0.342199565
49366	1	1	2	74	2	7509.824737	7916.341703	24.67	98.5	55.5	76	180	1201.3	1	1670	2007-2008	3.347500454
49374	2	5	2	54	3	94583.35604	94282.94564	31.31	111.1	87	70	134	810.2	1	1816	2007-2008	1.541806188
49379	5	5	2	47	3	97373.94673	99236.781	22.56	89.9	85.1	66	120	899.7	2	3603	2007-2008	0.182649687
49386	2	3	2	66	3	53804.7637	60734.78147	27.1	98.5	72.7	66	132	914.2	2	1068	2007-2008	1.837239901
49391	4	4	1	59	4	20345.89528	20526.88923	33.38	107.4	97.5	82	134	1037	2	2249	2007-2008	-2.615710689
49392	5	5	1	62	4	7750.960967	7944.069793	27.17	103.4	91.7	64	116	562.6	1	2684	2007-2008	-1.284014851
49393	4	2	1	49	4	38539.48619	38325.91072	23.5	89.5	66.4	54	90	699.9	1	1428	2007-2008	-0.602402017
49395	4	4	2	48	3	125264.6428	126073.5275	30.12	101.3	82.7	86	130	732.6	1	2030	2007-2008	-2.316037138
49398	4	4	1	79	3	33971.81521	41713.0649	31.38	100.7	84.4	68	142	322.8	1	1638	2007-2008	1.04934535
49404	4	4	2	44	3	27331.88202	27136.41889	38.48	120.6	105.4	102	184	1049.2	1	1602	2007-2008	1.889768159
49410	4	4	1	53	3	104240.2302	104430.8262	27.64	98	86.2	86	118	536.1	1	1823	2007-2008	1.22043971
49413	1	5	2	69	1	4379.642722	4734.540398	27.68	88.7	60.8	76	170	1843.8	1	1571	2007-2008	2.490553829
49416	5	5	1	61	3	63205.758	61838.5431	36.37	118.7	101.2	70	164	787.1	1	2438	2007-2008	2.86524951
49419	1	1	2	70	1	10060.79733	10587.09322	37.35	107.6	78.1	72	144	818.9	1	1103	2007-2008	2.281969651
49432	4	4	1	54	3	73285.01685	75398.80637	27.29	98.3	93.3	82	122	641.3	1	2382	2007-2008	-1.917161745
49433	3	4	1	60	3	17290.31078	17198.82308	32.1	121.6	112.6	70	124	623.2	1	1827	2007-2008	1.33962837
49436	3	3	1	51	3	76861.66606	77002.20226	44.67	145.6	137.9	74	122	855.6	2	1481	2007-2008	2.875187664
49445	2	1	2	45	1	20466.9514	20772.36709	23.05	83.9	55.8	86	134	525.9	2	2012	2007-2008	0.617741819
49449	1	3	2	44	1	15609.97942	15642.99012	32.71	98.2	73.4	66	112	923.7	2	1573	2007-2008	-2.38611479
49452	3	2	1	41	1	17436.99873	17910.3471	20.33	73.7	49.6	70	114	1402.7	2	1646	2007-2008	0.752605933
49453	2	3	1	42	3	30828.74834	31916.00829	20.53	79.6	61.3	64	104	725	2	4873	2007-2008	-3.002947902
49454	4	4	1	43	3	28765.18945	29891.80659	24.94	96.2	81	74	110	792.4	2	1465	2007-2008	-1.886435492
49465	2	2	2	43	1	14749.89473	14576.25966	28.67	90.4	75.9	74	98	1171.8	2	2331	2007-2008	0.202135511
49477	5	5	2	41	3	129047.3825	132725.4469	19.26	78.1	61.1	76	108	570.3	1	2244	2007-2008	0.163134708
49484	1	1	2	52	3	29941.78607	30103.00281	23.07	90.7	63.5	92	158	415.5	2	1355	2007-2008	4.260522507
49486	4	4	2	73	2	10872.75752	11408.07648	30.03	95.7	68.3	54	122	1046.6	1	1674	2007-2008	-0.52194915
49489	3	4	2	55	3	146271.9709	145807.39	29.28	95.4	74.3	68	116	853.6	2	671	2007-2008	3.606106082
49492	4	4	1	51	4	32161.60861	31983.37762	22.95	87.1	79.3	74	106	722.7	2	3527	2007-2008	0.078804352
49502	1	2	2	78	2	8550.306903	10025.88644	29.49	98.5	64.6	92	148	1233.7	1	1556	2007-2008	0.133432618
49507	2	4	2	60	2	4379.642722	4637.472605	34.39	105.7	87.6	74	116	814.6	1	1714	2007-2008	-0.497723843
49511	5	5	2	48	3	80250.36656	83130.13787	28.43	88.7	71.6	60	110	768.9	1	939	2007-2008	0.436903208
49516	5	5	1	44	4	28456.58978	28298.89101	29.86	98	92.6	58	100	708.7	2	2769	2007-2008	3.118009348
49520	3	3	1	43	3	88826.36595	91913.7757	26.47	93.8	74.8	76	110	975.7	1	2040	2007-2008	0.875402156
49521	3	3	2	66	4	9145.177468	11273.60494	44.41	128.4	113.4	72	138	1324.1	1	1544	2007-2008	-0.982892407
49522	4	4	2	54	1	16965.19077	16765.47734	31.8	107.8	80.6	96	150	912.3	1	1480	2007-2008	2.135403376
49523	4	NA	2	55	3	96663.55644	96356.53903	46.41	127.8	116.6	72	126	541.5	1	2392	2007-2008	-1.104704489
49526	3	3	2	44	2	22806.96363	22538.48111	24.74	83	58	76	106	1277.6	1	2899	2007-2008	-0.254522897
49527	5	4	2	50	5	71331.12236	72706.5589	24.85	91.2	65.7	74	120	953.4	1	2142	2007-2008	-3.188222887
49530	1	1	1	40	1	17436.99873	17910.3471	24.78	93	71.1	70	122	749.6	1	1994	2007-2008	2.80214109
49536	4	4	1	49	2	19794.03193	21228.05292	27.14	95.7	83.5	84	118	797.5	2	1898	2007-2008	1.681493922
49546	5	5	1	60	3	72103.32596	73791.50092	28.8	100.7	NA	78	120	683	1	3339	2007-2008	-0.865174308
49552	4	4	2	71	3	39806.31553	49341.58607	28.6	99.6	67.3	76	146	584.5	1	1462	2007-2008	-1.896971348
49555	1	1	2	69	1	8251.2084	9293.601084	31.74	107	83	92	180	635.2	1	892	2007-2008	2.52350447
49557	3	5	2	72	3	33715.31325	32773.26977	28.99	99.2	75.7	74	136	538.6	1	974	2007-2008	3.298727315
49560	5	5	2	49	3	84114.8214	83513.27679	28.8	100.7	NA	50	80	1395.5	1	912	2007-2008	3.258119383
49561	4	4	1	62	3	17290.31078	17764.59486	42.62	149.2	146.8	66	112	649.7	1	2008	2007-2008	3.462530701
49562	5	5	1	60	3	53088.2953	52807.39081	32.24	110	108.2	88	138	759.1	1	2555	2007-2008	-1.253832501
49565	4	1	2	61	1	7027.280799	7026.958542	30.42	96	74.8	86	160	1947.4	2	3087	2007-2008	-1.939270489
49568	4	4	1	52	3	79632.53077	79778.1333	28.4	103.5	91.9	86	118	931.7	2	2666	2007-2008	-2.922536154
49571	5	5	1	65	2	5821.317209	6204.251871	28	101.8	79.6	78	124	971	2	2870	2007-2008	2.502095618
49576	4	4	1	51	2	14062.40052	15081.18121	30.09	104.3	88.3	84	150	826.5	2	3260	2007-2008	-1.619684949
49584	4	5	2	74	3	27789.5029	28256.72288	24.64	87.6	67	84	148	806.5	1	3017	2007-2008	-2.397371476
49585	1	4	1	78	5	29384.51223	29418.51731	26.14	99.5	69.7	40	102	703	1	1518	2007-2008	-0.801501645
49586	4	4	2	45	2	16080.85854	15891.55542	27.83	95.6	68	64	102	891.3	1	3268	2007-2008	-1.124911622
49589	2	2	2	50	3	109492.6497	112034.1147	38.45	113.8	116	62	146	994.5	1	1482	2007-2008	2.026971382
49590	2	1	1	50	2	17560.19321	18832.37897	29.1	107.6	86.7	70	112	498.4	1	1882	2007-2008	2.194231908
49591	4	5	2	74	3	30963.71301	37642.01712	23.3	93.5	70.8	86	142	986.7	1	2068	2007-2008	0.819815361
49595	3	3	1	46	3	27982.06651	28516.56842	30.64	107	93.4	64	110	295.9	1	1872	2007-2008	3.678557582
49598	1	2	2	73	4	13104.92612	13027.58664	34.52	111.2	86.4	50	106	883.7	1	712	2007-2008	3.557544642
49599	5	5	1	41	3	122044.5699	126286.5716	30.73	113.5	102	72	104	843.4	2	1737	2007-2008	0.96542545
49609	1	1	1	78	3	8384.649228	8232.10623	29.56	119.9	92.6	44	190	704.1	1	1231	2007-2008	1.565698985
49612	5	5	1	46	3	75464.0677	76683.04766	25.14	88.6	78.5	64	112	803	2	3869	2007-2008	-2.099751296
49618	2	2	1	66	4	7750.960967	8156.464418	27.37	93.5	82.1	86	162	1053	1	1205	2007-2008	3.212072307
49619	4	4	2	73	3	26962.17313	29369.37896	33.24	107.4	85.1	72	158	852.5	1	875	2007-2008	3.75566626
49622	3	4	2	71	3	19606.00553	19682.69379	42.8	113.8	102.7	80	174	966.6	1	1846	2007-2008	1.987065932
49624	3	3	2	50	3	26482.3742	26760.10071	38.01	118.6	104.5	66	98	614.4	1	3188	2007-2008	-1.318451187
49626	4	1	2	40	3	27933.00039	27733.23838	25.09	90.7	74.3	70	106	679.1	2	4097	2007-2008	-0.585000696
49628	5	5	1	62	3	45398.80355	46461.7382	27.36	108.5	85.9	76	122	431.8	1	1756	2007-2008	1.705232478
49629	5	5	2	58	2	14000.79352	13835.97683	23.23	79.9	62.1	70	110	928.2	1	1825	2007-2008	-2.009183123
49630	1	1	1	44	3	29437.29548	29431.69671	22.16	89	71	84	136	666.3	2	8069	2007-2008	-3.576205926
49633	3	3	2	65	3	52544.8609	53155.16237	24.61	83.1	69.2	74	132	1198.8	1	1398	2007-2008	3.378644536
49635	3	3	1	45	3	31673.75742	31667.7333	35.3	119.1	106.5	46	110	480	1	2653	2007-2008	2.868291816
49638	3	3	2	73	2	6340.396598	6724.765998	26.36	95	67.4	80	180	793.2	1	2125	2007-2008	1.556843242
49641	5	5	1	68	3	58553.01978	59923.9377	29.22	104.1	92.7	72	126	895.8	1	1744	2007-2008	-0.177843829
49642	2	2	2	46	3	33999.42797	35219.49189	51.11	144.4	144.6	80	124	1684.1	1	1792	2007-2008	3.019378071
49644	5	5	1	60	3	52939.84105	60831.92946	26.9	101.2	88.8	74	126	527	1	2638	2007-2008	-1.512543452
49654	5	5	2	65	3	55604.39463	57189.67701	27.25	91.7	73.2	76	134	804.9	1	995	2007-2008	1.576366256
49656	2	2	2	45	1	16631.04585	16879.22068	27.22	92.3	77	76	132	689.1	2	1790	2007-2008	-1.123012875
49659	1	1	2	74	3	37752.25845	36697.41821	27.22	105.5	70.3	76	128	923.3	1	1056	2007-2008	2.937299688
49662	3	3	2	74	3	33715.31325	33320.6218	20.54	70.5	53.7	66	144	687.7	1	1669	2007-2008	-0.365620787
49664	2	1	2	57	4	22428.7243	22837.22915	30.62	111	77.7	68	104	810.9	1	3304	2007-2008	0.689838803
49670	4	5	1	65	1	5678.599581	5785.767275	28.74	110.9	79.3	80	130	989	1	1463	2007-2008	0.708466258
49674	4	4	1	53	4	23942.48032	25832.30144	42.16	129.5	135.7	82	124	762.7	1	1867	2007-2008	1.136892538
49676	4	4	1	59	3	63806.11334	63922.77837	31.6	121	104.2	74	104	682.8	1	1796	2007-2008	0.385783098
49680	5	5	1	48	3	138079.655	140717.1957	22.26	85.6	72.2	82	126	643.8	2	2772	2007-2008	-0.375382804
49682	1	1	2	73	1	5957.076377	6860.05469	29.71	100.9	65.7	74	174	1267.4	1	1334	2007-2008	2.383328657
49686	2	4	2	42	3	29670.9949	29458.80368	38.22	125.2	94.1	76	118	927.2	1	2834	2007-2008	2.359114195
49689	4	5	1	55	3	98000.09	98179.27634	28.51	103.6	88.4	78	130	1004.7	1	3461	2007-2008	0.22300878
49698	5	4	1	61	2	7607.859674	8686.193593	18.36	72.1	55	54	190	622.1	2	2495	2007-2008	-0.909317698
49699	3	4	1	48	3	32628.97741	33207.62352	24.92	92.4	79.4	84	126	677.2	2	2664	2007-2008	0.128484948
49700	2	2	2	45	3	27331.88202	27136.41889	17.82	66.4	40.8	46	102	702.3	1	1301	2007-2008	2.200438309
49704	1	1	1	69	3	18456.99169	18413.64427	31.41	101.1	78.7	74	134	624.4	1	1134	2007-2008	2.490815753
49707	4	4	1	78	3	9471.568094	9386.121089	29.91	100.7	78.4	0	132	1118.7	1	1565	2007-2008	0.977008134
49708	3	4	1	53	4	20422.84537	21503.09482	27.44	100.7	74.7	72	126	639.7	2	3667	2007-2008	-1.229563545
49709	2	2	1	55	3	92508.104	96770.54072	27.06	99.1	86.7	72	126	568.9	2	1420	2007-2008	2.06871265
49711	1	1	1	69	4	7750.960967	7949.197413	21.9	85.5	68	70	146	576.5	1	691	2007-2008	3.667952326
49719	2	2	2	65	4	12799.06778	15777.89325	34.28	112	99.2	62	134	1560.2	1	2918	2007-2008	-0.260161431
49721	3	3	1	64	4	5758.083982	5720.994764	23.19	92.4	73.8	82	154	530.8	1	1083	2007-2008	0.418432298
49723	5	2	1	70	3	28153.11442	28102.55699	28.8	115	NA	70	130	720.1	1	461	2007-2008	3.763733047
49725	3	3	2	56	5	95352.03813	95049.18628	32.65	107	96.6	74	112	703.1	2	1825	2007-2008	-0.147452692
49728	3	3	1	73	3	46627.37121	45779.07347	22.59	92	75	84	130	770.3	1	1437	2007-2008	1.931507725
49732	2	2	1	57	5	22038.57028	24126.08606	26.41	101	82.1	36	154	856.3	2	2707	2007-2008	0.610687971
49735	3	3	1	54	3	24758.78665	24804.05637	42.58	135	131.6	70	124	691.3	1	3555	2007-2008	1.437501706
49736	3	3	2	72	2	7716.623556	7977.11435	27.58	87.1	71.5	82	134	762.8	1	1436	2007-2008	-0.391343908
49737	2	2	2	62	1	5940.493142	6504.160053	41.82	117.8	92.6	84	168	444.9	1	996	2007-2008	1.512803296
49741	2	3	2	70	2	8722.912276	10045.13817	22.72	87.5	57.5	56	118	606.5	1	3001	2007-2008	-0.944850165
49742	2	2	2	51	1	12786.02656	15104.50707	29.28	90.6	65.7	76	124	769.7	1	1528	2007-2008	-0.468911173
49743	5	NA	2	58	2	11651.52546	11514.36424	45.31	126	128.8	54	96	1602.9	1	2288	2007-2008	1.651016101
49745	4	4	1	79	3	13042.67859	13552.80079	31.91	121	89.3	80	142	605.1	1	1538	2007-2008	0.241222717
49746	3	3	2	76	3	22147.57128	21528.74342	30.55	107.2	73.4	58	126	760.1	1	1787	2007-2008	2.612425232
49751	5	4	2	49	2	20300.12511	20603.05136	30.7	103.7	71.3	76	112	758.7	2	1443	2007-2008	2.767771984
49752	3	5	2	72	3	37998.51326	37536.4176	27.52	101.8	67.4	86	156	893.9	2	1510	2007-2008	1.231390614
49754	1	4	2	70	4	13653.9976	15314.21358	25.61	92.8	61.3	84	148	1288.4	1	1177	2007-2008	2.2638623
49758	3	3	2	69	3	25483.16181	26623.88054	29.68	107.8	77.4	62	134	633.6	1	1212	2007-2008	2.797581564
49759	5	5	1	45	1	25443.67007	25903.57313	29.48	97.4	76.9	80	110	1501	2	1320	2007-2008	1.357096078
49762	4	4	1	44	3	26649.74295	26644.67436	27.01	93.2	80	74	120	1191.1	2	3502	2007-2008	-1.545946196
49767	1	NA	1	54	2	11184.65855	11386.82509	28.28	108.1	90.3	78	136	1112.4	2	3196	2007-2008	-0.446381831
49770	1	1	2	76	1	9121.612069	10504.27319	19.59	76	47	70	166	1035.1	1	1907	2007-2008	0.409368203
49773	5	3	1	57	3	79632.53077	87175.40504	24.6	96	81.4	92	142	488.5	1	1931	2007-2008	0.531684257
49781	4	2	1	46	4	22437.25051	23624.05024	27.7	99.5	85.7	108	166	749	2	2513	2007-2008	1.225252159
49782	3	5	2	47	3	125264.6428	126073.5275	21.93	82.6	61.9	90	150	753.1	1	2625	2007-2008	-0.44578564
49788	3	3	1	41	3	97704.79462	97686.21187	28.41	106.5	87.5	78	114	628.5	2	2728	2007-2008	0.683606223
49792	4	NA	2	54	3	105908.4124	105572.032	29.73	99.2	78.3	62	118	1049.7	1	1391	2007-2008	1.069871444
49795	3	5	2	64	4	9548.842248	11771.21773	43.34	127.3	109.7	76	148	1167.4	1	921	2007-2008	1.133025259
49796	4	4	1	46	2	16596.32699	17559.00133	29.62	104.8	90.6	74	130	1140.3	2	3420	2007-2008	-2.81186456
49799	1	1	2	69	3	25164.265	25456.54454	27.19	98.4	77.2	70	130	1203.3	1	1089	2007-2008	3.090818746
49810	5	5	1	73	3	28153.11442	27640.9212	30.27	117.9	97.1	70	140	797.6	1	1441	2007-2008	1.597821398
49813	3	3	2	46	5	25889.74401	28066.36283	35.79	107	93.7	80	132	840.2	1	2072	2007-2008	2.214212343
49814	3	4	1	47	3	101680.9428	105663.3776	28.35	106.5	100.1	78	124	867.4	1	3146	2007-2008	0.252084456
49815	1	1	2	78	3	19298.15925	19611.15308	31.6	103.8	76.5	50	142	650.2	1	918	2007-2008	3.560560623
49818	4	5	2	58	1	16965.19077	16765.47734	24.69	91.8	66.5	66	128	685.2	2	1494	2007-2008	-2.025910108
49821	1	1	1	72	4	13270.59273	14516.12954	25.54	100	80	60	122	584.1	1	1967	2007-2008	2.013885259
49825	3	3	1	68	3	61587.52901	61442.88679	65.37	100.7	201.8	82	164	955.2	1	3785	2007-2008	-1.39358112
49827	1	1	2	76	3	23231.84649	22582.72277	25.35	90	59.8	106	206	859.1	2	1167	2007-2008	2.503902876
49828	2	4	1	43	4	24136.53828	23773.24501	37.29	115	126.1	66	100	726.5	1	1724	2007-2008	-1.427384489
49832	5	5	2	48	3	75485.15397	75837.02222	23.3	84.1	68.3	68	122	618.6	2	1769	2007-2008	0.600822639
49834	2	2	2	46	2	23128.20913	23177.11876	41.81	121.6	96.1	74	126	1022	1	1217	2007-2008	3.523472847
49838	3	1	2	54	1	18454.55483	18729.94077	29.82	103.2	87.1	74	114	580.5	2	200	2007-2008	4.286101187
49840	5	5	1	40	4	23966.45196	23833.63633	34.88	108.9	115.4	94	134	650.6	1	1617	2007-2008	0.138676729
49843	1	1	1	73	1	7697.299984	7802.303772	23.43	95.2	58.2	58	110	1798.4	1	2598	2007-2008	0.673370962
49847	1	1	1	72	3	9935.266183	10270.28658	27.96	114.8	89.2	84	136	744.9	1	1433	2007-2008	3.135452937
49849	3	4	2	61	1	5992.011661	5929.418629	31.62	105.7	91.5	68	126	564.4	1	2386	2007-2008	-0.098585389
49853	3	3	1	67	4	6530.192524	6488.129967	29.81	106.7	100.5	64	178	935.9	1	1641	2007-2008	0.84255864
49856	2	2	1	68	4	8415.785873	8282.083923	23.33	84.7	70.7	84	146	1041.8	2	2221	2007-2008	1.732522056
49858	1	3	1	41	1	14308.03506	17146.11746	34.45	117.5	108.3	94	130	629.2	2	3275	2007-2008	-0.386813636
49868	5	5	1	40	5	69911.47193	71472.98966	24.22	85.2	69.1	98	128	1109.5	2	1648	2007-2008	-0.415498895
49870	5	5	2	49	3	81190.89097	81715.17352	28.82	91	83.4	76	114	809.3	1	1010	2007-2008	3.360432261
49871	2	NA	2	63	3	58036.49252	59317.2937	32.25	114.8	83.9	60	112	764.3	1	1334	2007-2008	3.353647931
49875	2	2	2	57	4	19905.92012	21190.22383	32.27	103.2	91.3	68	134	641.4	1	1395	2007-2008	1.665305102
49878	4	4	2	45	3	27519.5522	28398.27055	24.74	86.5	69.9	90	144	914.7	1	3169	2007-2008	2.0338234
49879	4	4	1	58	3	22038.57028	24126.08606	32.82	118.2	103.3	58	146	791.2	1	2378	2007-2008	2.134460239
49880	3	2	1	78	3	27196.61929	29794.94114	27.33	101.2	74.6	64	126	598.8	1	1073	2007-2008	2.373520285
49887	3	4	1	52	2	14309.20893	15743.20075	40.05	125.9	117.1	88	140	800.1	1	5111	2007-2008	-1.334411433
49888	2	2	1	49	2	20780.96033	21773.79325	26.75	94.5	84.2	86	144	1205.5	2	3322	2007-2008	-0.15141828
49891	2	2	2	45	3	26186.97577	26222.97959	27.26	99.3	69.1	74	126	744.9	2	4683	2007-2008	-1.432684337
49895	5	5	1	74	3	23204.91726	28492.68471	24.54	97.6	80.3	60	100	843.9	1	2048	2007-2008	-3.451081588
49901	3	3	1	64	3	46440.0135	45628.42658	26	92.5	69.5	66	128	487.9	1	1617	2007-2008	1.137057237
49903	3	3	2	49	3	34888.213	35113.50036	24.3	92.3	67.6	60	108	950.5	2	3100	2007-2008	1.002057245
49906	1	4	1	73	3	9935.266183	9754.512613	30.16	110.9	96.3	70	140	1357.1	1	1142	2007-2008	2.374645195
49909	2	2	2	51	3	125886.926	125487.0909	22.85	83.5	71.6	52	100	731.9	2	1416	2007-2008	3.729793226
49912	3	2	1	75	3	11018.74247	12705.87134	33.47	120.7	110.5	66	118	1338.9	1	953	2007-2008	1.674530557
49916	4	4	2	42	4	25996.1587	26883.14529	46.05	135.8	124	84	118	847.5	1	1822	2007-2008	0.985008711
49917	3	2	1	49	1	15222.69943	16748.23634	25.1	89.5	68.5	76	118	1147.5	2	1190	2007-2008	1.251303967
49920	5	5	1	60	1	7102.281573	7456.490139	30.49	99	81.7	80	122	716	2	1518	2007-2008	-0.184165152
49921	2	2	2	46	1	13344.2369	13187.14917	21.87	75	53.9	66	114	891.7	1	790	2007-2008	2.278633531
49924	1	1	2	77	1	11558.91437	12984.66171	30.94	96.5	73	50	156	450.9	1	1781	2007-2008	0.952293899
49928	2	2	2	47	3	85964.78414	85350.00958	32.9	108.2	81	74	122	901.4	1	2142	2007-2008	2.454895418
49932	5	3	1	71	2	7264.694177	9115.155691	27.87	95.2	74.4	80	118	948.4	2	1867	2007-2008	2.09220962
49943	2	2	1	49	3	102481.1615	102461.6703	29.65	99.5	87.4	74	126	679.8	1	3454	2007-2008	1.628100681
49944	3	3	2	63	1	8251.2084	8136.69797	26.1	89	62.3	64	132	849.9	1	303	2007-2008	3.88292767
49945	4	4	1	58	3	83459.20123	83611.80056	47.44	144.9	154.4	82	138	787.6	1	3624	2007-2008	-0.081308629
49947	2	2	2	70	4	13104.92612	13027.58664	36.31	112.8	104.8	80	150	622.8	1	1432	2007-2008	2.138920845
49953	3	3	1	43	3	76612.76648	76598.19528	26.12	95	73.8	102	144	703.5	2	3150	2007-2008	1.834938903
49957	4	5	1	61	3	49593.47222	49331.05979	24.8	95.8	73.1	108	196	641.7	2	1623	2007-2008	-1.159319295
49963	3	3	1	49	3	90756.45097	99152.80406	24.82	94.8	86.6	80	130	887.5	2	1660	2007-2008	-0.123996689
49973	4	4	2	64	3	55519.27405	56164.12293	23.07	85	63.1	70	134	1552.9	1	852	2007-2008	2.204319262
49974	3	3	1	55	2	14772.34746	14808.85681	26.78	98.1	82.4	72	126	704.6	2	2639	2007-2008	-0.451927075
49976	3	3	2	70	4	10882.34794	12071.28609	26.16	97.7	68.4	70	112	900.2	2	1172	2007-2008	-0.899701341
49986	5	5	2	63	2	8251.2084	8250.830017	33	96.5	84.7	72	126	1129.6	2	744	2007-2008	2.465559879
49995	5	5	1	71	5	23204.91726	23831.67307	24.25	91.3	72.4	64	134	521.7	1	1301	2007-2008	-1.473876339
49996	1	1	2	61	1	8251.2084	9293.601084	35.22	109.2	89.5	60	164	690.1	1	1005	2007-2008	2.01674313
50000	5	5	1	46	3	92720.06258	101728.1212	28.05	100.3	91.8	58	128	604.6	1	2216	2007-2008	2.439040388
50001	3	3	2	55	3	120732.4204	120348.9568	27.54	98.7	74.8	70	124	706.9	1	1931	2007-2008	-0.763717716
50002	4	4	1	46	4	24472.84204	25767.3127	26.72	93.8	85.6	84	104	503.7	2	3137	2007-2008	0.492902448
50015	1	1	1	62	3	49593.47222	51086.25992	33.01	116.7	99.7	96	178	2176.4	1	3941	2007-2008	-0.831731554
50023	5	5	2	62	3	55310.0861	57654.92135	26.92	96.8	67.8	80	142	893	1	1720	2007-2008	-0.120475624
50025	5	5	1	42	3	118353.99	120614.7392	30.33	103.8	85.4	76	114	851	1	3102	2007-2008	-1.102069685
50026	4	4	1	61	4	6180.685156	6167.437747	18	67.8	62.2	78	130	738.2	2	2435	2007-2008	1.502326636
50029	1	4	2	65	1	2812.526496	2778.341925	31.47	112.3	76.3	74	136	966.9	1	876	2007-2008	2.602345189
50031	1	1	2	78	2	11483.63877	13778.47842	33.08	106.5	71.1	48	124	909.1	1	1030	2007-2008	2.6552797
50037	3	3	2	74	3	33525.31545	36363.60981	33.66	119.9	98.9	70	156	1086.7	1	2362	2007-2008	1.714338684
50039	3	3	2	54	1	12261.11231	12116.77506	24.51	84.6	54.7	66	134	759	1	1308	2007-2008	1.313737655
50040	5	5	2	56	3	95352.03813	95049.18628	25.61	88.4	70.9	78	108	983.5	1	1516	2007-2008	-3.252458613
50041	5	5	1	68	3	47970.04703	49093.18291	29.45	109.5	84.3	54	114	660.9	1	1472	2007-2008	2.149032659
50043	1	1	1	76	3	43488.8604	48431.36054	27.15	100.7	74.1	58	124	1231.4	1	1599	2007-2008	1.555859963
50048	2	2	2	43	4	26854.47862	27343.5918	27.63	107.6	72.7	78	152	410.8	2	2655	2007-2008	2.707550706
50050	3	3	1	63	3	51762.65651	50642.96936	24.86	96	69	62	160	739.2	1	876	2007-2008	0.668230999
50051	3	3	2	70	3	33715.31325	33773.65413	47.47	132.5	122.6	70	138	829.4	1	1616	2007-2008	1.533441973
50052	4	4	2	64	3	22473.38602	23114.10269	32.02	96.7	82.7	58	100	761.9	2	1551	2007-2008	2.936756734
50054	4	4	2	43	3	84114.8214	83513.27679	32.92	101	86.5	80	118	813.9	1	2180	2007-2008	1.138313955
50055	2	2	2	79	4	13288.85851	15332.75884	27.38	89.3	66.3	66	154	1372.7	1	1453	2007-2008	2.291262236
50057	5	5	1	51	3	91441.19906	100527.5688	35.81	103.6	104.1	72	130	732.5	1	2750	2007-2008	1.369318484
50058	5	5	1	60	3	53141.08851	54598.78194	26.14	99.4	83.3	72	126	698.5	1	2832	2007-2008	-2.847510173
50067	5	5	1	74	3	30052.77379	29781.65506	24.76	103.1	70.8	62	94	462.8	1	1496	2007-2008	-1.040093428
50070	2	2	1	51	3	87404.18132	90669.42167	25.95	101.5	83.6	90	136	522.1	1	1045	2007-2008	2.906625935
50074	3	3	2	66	1	6681.804407	7235.333228	28.86	93.2	65.8	74	114	673	2	1002	2007-2008	-0.060405421
50085	5	5	1	46	3	90756.45097	99152.80406	23.86	95.9	79.3	82	118	492.4	1	2972	2007-2008	1.09428371
50093	2	2	1	78	3	30137.04798	30558.33015	34.44	115.8	111.1	74	128	568.6	1	3708	2007-2008	0.192697228
50094	2	2	2	41	3	29322.50606	29362.82084	45.93	139.2	118.6	82	122	387.4	1	1650	2007-2008	1.741250793
50096	2	2	1	50	4	16963.97862	16708.64377	27.42	94.2	78.6	76	120	979.1	2	2535	2007-2008	0.503229145
50099	4	4	2	41	3	27554.00914	27356.95748	28.8	100.7	NA	62	82	662.3	1	1517	2007-2008	-1.563514837
50101	3	NA	1	72	3	8384.649228	9065.727967	36.87	121.6	114.6	90	144	947.6	1	2660	2007-2008	0.091822644
50102	2	2	1	72	4	11606.51594	12301.10949	29.92	104.8	79.7	62	136	774.4	1	1275	2007-2008	3.941816143
50108	4	4	1	51	3	88652.04238	88814.13646	32.88	119.2	108.8	76	128	1140	1	2855	2007-2008	-0.78697067
50109	1	1	1	75	3	9781.278617	9702.567344	27.27	109.6	87	64	122	632.1	1	1353	2007-2008	2.167936413
50110	1	1	1	48	1	21123.01512	22653.31714	31.16	102.4	83.9	72	114	649.7	1	1990	2007-2008	0.400871263
50111	3	3	1	57	1	14238.1869	15269.70281	34.53	119.1	107.2	82	116	1323.6	1	2535	2007-2008	0.507926825
50116	5	5	2	47	3	88636.92626	88003.04195	30.11	91	79.7	80	116	1505.3	1	1438	2007-2008	1.088757842
50119	4	4	1	46	3	90414.49484	98779.21178	29.82	102.7	92.7	92	134	641.5	2	1268	2007-2008	3.408476606
50122	4	4	1	61	3	49517.55331	50676.92138	42.5	135.9	124.7	72	144	677	1	1804	2007-2008	1.46746757
50129	1	3	2	48	3	25724.86815	26229.62498	25.01	90.8	56.2	68	112	494.5	2	1238	2007-2008	2.883311551
50131	4	4	1	50	4	15732.11783	15495.32445	26.25	89.1	80.4	86	134	564.8	1	1765	2007-2008	0.462048116
50133	2	1	2	76	3	22871.77405	22462.46401	27.26	100.5	67.7	66	160	871.4	1	1212	2007-2008	2.859348946
50135	5	3	2	52	1	14963.35478	15186.64369	25.86	85.6	54.6	68	122	696.5	2	1844	2007-2008	2.847873452
50137	4	4	2	44	3	36966.64067	38147.0111	27.02	93.6	77.9	74	110	965.1	1	1851	2007-2008	0.822951993
50140	2	3	2	75	1	10060.79733	12071.30263	39.97	108	83.7	60	146	938.4	1	1324	2007-2008	1.086612125
50142	5	5	1	55	2	8727.797555	9234.055759	29.89	109.5	94.5	80	128	800	2	2433	2007-2008	-2.999439946
50144	4	4	1	73	3	27196.61929	27931.18941	26.88	101	86.4	64	104	1067.4	2	2951	2007-2008	-0.457309257
50157	4	3	2	44	2	34415.55704	34929.11917	29.22	89.6	70.1	64	122	938.9	1	1009	2007-2008	1.934679296
50165	3	3	1	55	4	22436.10665	22311.77178	31.01	112	99.9	74	124	885.2	2	3312	2007-2008	-3.504829369
50167	1	1	1	42	1	15503.79413	16244.50471	32.26	107	91.8	100	140	737.1	2	4370	2007-2008	-0.972967336
50169	4	5	2	67	4	6526.610417	6599.913656	30.18	108.4	86.2	70	108	593.8	1	3630	2007-2008	-2.174296409
50170	1	1	2	63	2	7294.599204	7400.470668	23.3	75.7	52	64	160	671.2	1	479	2007-2008	3.810570003
50175	3	3	2	57	3	120732.4204	120348.9568	24.04	83	65.3	62	118	805.1	1	1339	2007-2008	-2.028897471
50187	1	1	2	60	2	8132.955237	8952.291052	31.53	100.4	79.5	76	132	861.8	2	2226	2007-2008	0.547016001
50189	4	5	2	51	3	110295.4524	112422.2155	32.29	103.5	83.7	74	108	540	1	1329	2007-2008	1.141295358
50194	1	1	2	61	1	8251.2084	9293.601084	26.16	91.5	60.2	74	130	1010.7	1	1438	2007-2008	2.735632131
50195	5	5	1	54	3	121613.6019	121835.9639	24.87	91.1	81.2	78	104	694.7	2	1518	2007-2008	0.249811415
50196	3	3	1	66	5	48104.99465	47828.46243	21.27	83	57	72	122	549.5	2	1248	2007-2008	1.964302543
50201	4	4	2	54	1	9900.809686	9784.257815	32.04	104.5	81.3	72	126	867.6	1	1645	2007-2008	-0.634033138
50202	4	4	1	47	3	89497.00381	89479.98212	29.44	108.3	101.1	88	136	224.1	2	2172	2007-2008	1.091912063
50208	1	1	2	58	3	33492.41442	33843.65677	25.27	91.6	63.4	66	124	542.5	2	1771	2007-2008	1.960833129
50211	4	2	2	46	1	25274.17312	25651.32401	23.17	78.5	58.2	64	112	1022.1	2	3735	2007-2008	-1.434138857
50218	4	5	1	45	3	69911.47193	71472.98966	30.03	116.6	104.8	60	114	839	2	1819	2007-2008	0.426328058
50221	1	NA	2	53	2	11754.30657	11615.93542	39.13	109.7	91.6	82	172	1458.4	1	2216	2007-2008	0.903939218
50226	4	4	2	48	3	86026.26595	87335.37308	41.37	122	107.9	72	110	843.8	1	2168	2007-2008	2.557155029
50228	1	4	2	72	2	10872.75752	13045.52136	35.26	109	78.5	70	138	1027	1	1670	2007-2008	2.269027068
50229	5	5	1	52	4	26263.16805	28390.03873	29.04	107.9	99.6	70	122	998.7	2	2061	2007-2008	1.118517823
50236	3	3	1	44	3	31673.75742	32790.81892	26.12	93.3	80.9	74	120	780.1	1	3539	2007-2008	-1.360233908
50238	4	4	1	51	3	23010.58598	23052.65923	20.76	88.5	66.3	74	118	699.7	2	1937	2007-2008	2.863876997
50240	4	2	1	59	4	19455.77912	19634.61354	28.8	123.6	NA	80	132	1080.8	2	2460	2007-2008	1.868093231
50243	4	2	2	43	3	25287.89646	25107.05084	43.46	133.2	119.9	72	126	393.5	2	1022	2007-2008	1.184554988
50244	3	3	1	48	2	16110.35395	16682.16726	24.52	91.1	76.3	78	116	803.5	2	1328	2007-2008	0.107417098
50251	4	4	2	78	3	37167.13286	36128.64169	23.41	85.5	62.9	104	146	515.7	1	1657	2007-2008	2.33325081
50252	4	4	1	73	3	9498.128327	9792.960512	20.49	83	56	84	142	797.9	1	2410	2007-2008	0.869277495
50260	3	3	1	52	3	22515.39801	24752.7181	22.64	90.7	68.4	74	110	1376.9	2	1400	2007-2008	2.582163669
50266	2	2	2	76	3	32569.84379	33098.089	29.08	96.6	80.9	60	132	563.4	1	1034	2007-2008	2.175266822
50274	4	4	2	66	2	4865.131732	5290.60255	34.96	104.4	77.3	60	126	693.8	1	1474	2007-2008	2.012520353
50275	2	2	2	62	5	21214.68822	23417.002	27.5	94.7	58.7	90	156	986.4	1	1118	2007-2008	3.155186377
50277	5	5	1	52	3	98000.09	98179.27634	36.44	124.1	121.1	86	102	662.3	1	2486	2007-2008	-1.982540354
50278	4	NA	2	63	4	11630.61	11899.83149	30.63	103.4	83.2	70	114	816.1	1	1001	2007-2008	1.743520056
50279	3	3	2	57	4	25246.16833	27368.68005	41.14	130.1	106.9	74	108	843.6	1	1063	2007-2008	3.11283442
50280	5	NA	1	58	2	11086.85851	11432.68127	41.04	130.5	125.4	62	114	550.8	1	1707	2007-2008	-0.365890774
50290	3	3	2	43	3	25724.86815	26751.90073	28.15	93.5	77	90	122	700.1	1	2631	2007-2008	1.345990971
50294	3	3	2	58	3	92231.45584	96297.71367	18.5	71.1	46.6	72	160	437.2	1	1648	2007-2008	3.890991155
50308	5	5	2	41	2	34415.55704	34929.11917	27.97	97	81.3	72	126	592.8	1	857	2007-2008	2.260787293
50319	4	4	1	60	4	7338.642463	7521.478712	26.43	100	84.4	84	144	944.8	1	2332	2007-2008	2.917398537
50321	4	3	2	59	3	104008.8112	104568.8299	26.77	90.5	76	82	148	1039.1	1	1271	2007-2008	0.561193004
50322	4	4	1	46	3	29001.58158	30137.45725	24.54	95.1	74.3	70	108	1222.4	2	2124	2007-2008	0.673657371
50324	3	1	2	68	1	7812.278838	9667.396322	34.99	108.2	84.4	58	128	831.6	1	1024	2007-2008	2.734210031
50327	3	4	1	46	4	26760.03358	26357.25253	28.22	101.7	89.2	84	122	606.6	2	2831	2007-2008	1.354269252
50332	3	3	1	60	4	7750.960967	7627.821119	22.36	86	72.6	72	126	858.6	1	1379	2007-2008	3.395708857
50333	3	3	1	68	4	6350.039051	6248.778133	30.86	106.5	86.8	54	112	987.5	1	1644	2007-2008	-2.882496369
50335	5	5	2	70	3	43711.97688	43126.80049	41.89	115.4	111.7	76	124	1095.8	1	1274	2007-2008	1.652340634
50340	1	1	2	68	5	62152.25688	64002.64749	21.18	82.8	52.4	68	176	432.2	1	751	2007-2008	3.728506753
50347	4	1	1	44	4	24472.84204	24754.48053	27.32	90.6	89.1	78	122	1005.9	2	2736	2007-2008	-1.373259715
50354	4	4	1	65	3	19060.51631	18648.21492	24.88	94.2	75.6	76	150	631.3	1	1553	2007-2008	2.531736178
50355	2	4	1	48	1	17164.15044	18407.64404	28.27	98.5	77.9	86	130	751.4	1	605	2007-2008	3.847243358
50362	5	3	1	67	1	12237.68427	15593.5946	25.59	95.8	77.2	88	136	896.6	2	1526	2007-2008	0.074949476
50364	4	4	2	46	4	25898.20924	27569.12753	27.49	90.8	78.7	66	146	381.4	1	1549	2007-2008	0.200233373
50369	2	2	2	77	4	11192.02236	12913.41763	20.58	90.9	57.8	0	154	1522.8	1	2145	2007-2008	-0.684260774
50370	3	4	1	52	4	22436.10665	24207.02711	38.96	100.7	129.2	66	90	534.4	1	1519	2007-2008	1.420641907
50374	4	4	2	69	4	9145.177468	9906.986187	20.39	81.2	57.2	46	128	886.4	1	1651	2007-2008	2.317050649
50375	2	4	2	71	3	25184.13597	25282.64291	30.62	115.5	78	74	176	1126	1	1374	2007-2008	1.40534034
50377	3	3	1	41	3	72397.28415	74950.57196	29.14	104.2	85.9	80	120	749	1	1554	2007-2008	1.202315214
50380	4	4	2	76	3	36091.21173	35082.78299	42.93	126.7	112.8	72	126	771.1	1	721	2007-2008	3.097603422
50381	2	2	2	50	3	30810.33824	32562.23459	30.07	110.3	87	90	158	547.5	1	1237	2007-2008	0.885445245
50383	4	4	1	74	3	8384.649228	8644.917815	29.75	118	86.9	64	132	540.2	1	1699	2007-2008	2.56164087
50386	1	1	2	40	1	16409.43314	16216.26205	26.11	82.2	54	66	108	580.9	2	1019	2007-2008	1.448009209
50390	1	1	2	74	1	9634.105961	11094.4513	29.73	103.4	69.5	68	126	667.9	1	1157	2007-2008	2.932938566
50396	3	3	1	47	1	24613.89336	25381.65321	29.92	114.3	102.5	72	110	1003.7	1	5091	2007-2008	-3.781313395
50406	4	1	1	41	1	18799.50736	22528.49956	31.1	96.7	85.3	70	114	1205.2	2	4321	2007-2008	-2.304399772
50411	3	3	1	74	3	36988.10357	37258.93026	32.36	115	92.2	66	146	808.6	1	1743	2007-2008	2.974541528
50412	3	3	1	40	3	22505.36051	22501.08015	32.8	118.8	112.5	86	128	719.9	1	2101	2007-2008	1.996785392
50419	2	2	1	63	4	6206.197747	6817.097261	22.08	91.9	65.1	70	124	732.2	1	2208	2007-2008	-0.354449074
50423	3	3	1	60	3	19360.58776	18941.79548	22.35	99.5	80.6	74	126	686.7	1	2131	2007-2008	1.336379702
50424	3	3	1	71	3	9935.266183	9754.512613	33.66	119.3	103.2	76	142	802.8	1	2011	2007-2008	0.521073101
50429	2	2	1	63	3	20152.54536	20759.1468	30.66	118.3	102.8	42	104	1198.6	2	2223	2007-2008	3.18834461
50431	1	1	1	79	4	11283.6325	11582.18732	26.43	96.6	79.3	74	120	859.7	1	1351	2007-2008	0.937147037
50437	1	1	1	68	3	56919.89885	55688.65448	25.26	96.4	75.6	84	122	715.5	1	1379	2007-2008	2.671686029
50444	5	5	1	55	3	66464.94794	68913.9813	22.66	90.9	73.9	82	116	852.1	1	3047	2007-2008	-0.661464634
50450	4	3	2	66	4	11318.91974	11106.09341	35.3	107.6	97.5	70	150	1156.4	1	1463	2007-2008	2.894952937
50454	5	5	1	49	4	25280.86633	25460.22417	28.8	100.7	NA	50	96	644.5	1	1630	2007-2008	1.719577952
50463	1	1	2	58	1	15789.40036	15603.52827	34.5	104.2	76.6	72	130	1118.8	1	950	2007-2008	3.02670085
50466	4	4	1	64	4	6933.4363	7106.177171	37.64	118.4	128	90	104	604.8	1	1152	2007-2008	2.822814791
50477	3	2	2	53	3	32032.12566	31930.387	26.1	93.3	75.7	76	146	798.1	1	1772	2007-2008	0.155726722
50478	4	5	2	51	3	113505.0071	113144.4989	37.85	110.6	90.7	66	124	876.8	1	939	2007-2008	2.153118367
50479	5	5	2	56	1	18454.55483	18729.94077	48.04	127.3	127.8	74	112	989.9	1	1481	2007-2008	3.117031116
50481	3	3	2	60	2	5422.543059	5741.76856	44.44	120.8	106.5	74	120	596.2	1	1369	2007-2008	2.622463532
50484	4	4	1	64	3	52939.84105	51794.69002	37.82	119.5	118.5	86	148	356.4	2	4182	2007-2008	0.073588749
50487	2	5	1	54	1	13811.68064	14061.3315	28.81	97	77.5	80	146	840	1	2730	2007-2008	1.065993301
50491	3	3	1	65	5	19866.89831	24785.70205	19.18	77.9	51.2	78	142	755.6	2	1683	2007-2008	1.667171375
50492	2	2	2	42	4	21944.86028	21853.19142	17.62	73.9	55.4	52	108	1041.5	2	2568	2007-2008	0.387722556
50498	4	3	2	77	3	33715.31325	34416.73562	32.53	114.5	85.8	56	134	832	1	1426	2007-2008	1.793161194
50504	3	3	2	40	3	34403.62375	34397.16909	21.04	79.6	51.8	72	116	536.5	2	1623	2007-2008	2.070710951
50505	5	5	1	61	3	21572.68348	22164.43574	34.43	122.6	122.6	0	136	1339.7	1	3214	2007-2008	3.026000435
50507	5	5	1	74	2	6077.295347	6097.191238	26.07	97	62.4	84	160	857.1	1	1681	2007-2008	0.667778878
50508	3	3	1	55	4	20345.89528	20526.88923	32.24	107.9	95.6	94	140	572.3	1	3225	2007-2008	2.084318806
50517	4	5	1	63	3	52939.84105	51794.69002	36.53	120	110.1	76	110	687.4	2	1204	2007-2008	-0.769763235
50522	5	5	1	40	5	20328.05721	20022.08763	32.6	98.6	105.5	74	120	1012	1	2047	2007-2008	-0.747335638
50523	4	4	1	45	3	72445.23626	72431.45769	27.31	95.6	99.3	58	130	458.6	1	3322	2007-2008	1.258687109
50526	1	1	1	78	1	11792.18329	12529.39559	33.62	113.4	91.1	48	134	1100	1	1849	2007-2008	2.62053361
50529	2	2	1	79	3	24692.98954	27499.34278	23.73	99	69.8	72	126	627.1	1	932	2007-2008	2.573812445
50532	5	5	1	57	3	63806.11334	63922.77837	27.53	103.2	88.7	88	112	813	2	1499	2007-2008	1.025572421
50534	3	2	1	48	1	13771.98354	13806.02052	36.12	116.7	96.2	86	154	981.1	2	1756	2007-2008	1.820745671
50535	3	3	2	55	4	27723.23716	30054.00258	24.28	97.4	69.5	70	114	938.8	2	3824	2007-2008	-0.065849897
50536	1	4	2	76	5	35189.99781	34560.24257	23.27	86.2	46.6	36	168	448.3	1	736	2007-2008	3.26640439
50544	2	2	2	46	3	92172.71634	91513.54594	29.15	94.8	74.9	62	102	833.4	1	489	2007-2008	4.211472708
50545	3	3	2	71	3	39806.31553	43176.36707	25.65	99.2	72.9	82	142	684.5	1	1379	2007-2008	1.222900551
50546	5	5	1	64	2	9107.121547	9820.577844	28.05	109.7	78.5	60	138	627.3	1	1451	2007-2008	-0.151092191
50549	1	3	1	70	1	10840.50203	12623.27674	28.07	101.7	84.7	66	118	789.1	1	1908	2007-2008	1.996772021
50551	3	3	1	76	3	30052.77379	29506.01983	36.54	136	122.1	38	132	976.2	1	3315	2007-2008	-1.91087487
50552	2	4	1	51	3	102792.3573	106579.9464	27.98	91.6	72.9	82	116	1009.3	2	1435	2007-2008	-1.18505016
50554	5	5	2	62	4	9548.842248	9369.298169	33.62	95.4	79	68	122	1051.1	1	1002	2007-2008	2.121321906
50556	3	4	1	59	4	19637.94688	19812.64302	33.13	117.3	101	72	124	512.7	1	1037	2007-2008	3.504459944
50557	5	5	1	52	2	12250.08278	13137.56623	27.75	98.4	84.9	100	146	553.6	2	1157	2007-2008	2.947283092
50558	1	1	1	79	1	10840.50203	11818.54353	25.57	103.1	67.6	84	146	1193.5	1	809	2007-2008	2.504616779
50559	3	3	2	75	3	49559.87731	48954.22719	22.09	81	57.2	76	134	746.7	1	1167	2007-2008	2.696046239
50570	3	1	1	51	1	14581.43092	15278.0746	31.88	115.8	102.5	68	124	807.1	1	1358	2007-2008	1.912463919
50577	5	5	2	65	3	55604.39463	56250.23217	28.79	96.7	73.8	56	122	789.2	1	1685	2007-2008	-0.696005477
50580	4	4	2	41	3	65721.67813	65251.67153	31.89	100	86.3	86	144	674.2	2	1693	2007-2008	1.301785675
50582	4	4	1	44	1	11503.23354	12336.60991	28.66	97.6	90.1	84	128	592.9	2	2987	2007-2008	3.039773989
50587	1	1	1	63	2	5821.317209	6884.053137	28.29	97.5	83.4	78	114	1155.7	1	1807	2007-2008	1.517405943
50593	2	2	1	52	3	24098.25878	24998.52014	39.43	131	127.9	72	120	698.9	1	758	2007-2008	1.568914391
50605	4	3	2	64	4	13895.91446	14051.9856	31.57	100.7	79.2	84	128	672.6	1	1075	2007-2008	3.509619053
50606	4	4	2	55	3	84879.68083	88621.81701	48.15	137	124.2	60	124	973.7	1	1118	2007-2008	1.653998799
50609	3	3	1	50	3	91441.19906	100527.5688	33.49	112.5	99.2	102	160	591.7	2	4953	2007-2008	0.627134917
50615	3	1	2	54	3	94583.35604	94282.94564	24.49	81.3	56.2	62	108	1368.5	1	3245	2007-2008	0.700356538
50619	4	4	2	40	2	14746.85171	15994.17623	21.29	77	62.7	58	100	1074.9	1	1900	2007-2008	0.239099138
50624	3	3	2	50	3	96663.55644	96356.53903	31.34	97.8	75.5	88	128	1058.8	1	1351	2007-2008	2.042215635
50625	4	4	2	60	2	8975.577102	8840.561234	27.9	84.1	68.5	80	146	853.1	1	3708	2007-2008	0.016715626
50628	1	1	1	41	3	30901.63116	32195.80834	33.2	119.8	105.9	86	152	987.4	2	1805	2007-2008	3.629101191
50629	3	3	2	47	3	97373.94673	99236.781	43.4	117.5	113.9	60	114	619.4	1	1374	2007-2008	3.413185656
50633	4	4	2	44	4	25996.1587	26883.14529	26.52	82.8	67.3	76	118	1448.4	1	928	2007-2008	3.922635655
50635	1	3	2	63	2	9867.233852	10405.27943	25.63	91.1	59.3	70	120	747.6	1	813	2007-2008	3.111045309
50638	1	1	2	66	1	6187.944271	6067.008437	35.07	113.2	76.2	72	134	906.3	1	653	2007-2008	3.901306422
50641	1	1	2	64	1	5164.551295	5101.779274	48.99	148.1	131.6	72	138	731.5	1	2686	2007-2008	2.208762649
50644	2	2	2	53	4	23741.01455	23641.84273	28.11	93.7	70	76	118	417.2	1	1704	2007-2008	3.051930583
50651	4	4	1	58	4	19455.77912	19162.93872	23.5	86	71.4	72	126	715.8	1	2553	2007-2008	-2.090048092
50652	5	3	1	54	3	87404.18132	90669.42167	29.07	106.2	88	86	134	1054.4	2	3750	2007-2008	-2.959193494
50658	4	4	2	75	3	53356.59064	60915.38571	40.71	100.7	98.7	54	126	1333.1	1	1060	2007-2008	2.621486776
50659	5	5	2	70	3	42969.40373	43039.65169	25.13	81.7	57	78	112	505.2	1	1968	2007-2008	3.334019101
50664	2	2	1	51	3	94535.82528	105297.5949	23.23	96.2	85.1	78	120	913.8	2	2490	2007-2008	1.778119751
50665	3	3	2	55	4	18328.23598	18251.67461	44.73	140.9	127	62	132	840.2	2	1575	2007-2008	0.854280279
50666	3	3	2	41	3	80582.49423	80567.3757	28.04	101.7	67.8	70	106	1002.7	1	3201	2007-2008	-0.028792246
50667	4	4	2	47	4	25996.1587	27673.39657	27.84	100.7	72.8	72	126	1362.1	2	2549	2007-2008	1.242665955
50672	4	4	1	50	1	10920.11255	11711.24347	32.97	120.2	116.9	86	116	857.2	2	7211	2007-2008	-3.928209974
50674	2	2	2	74	4	19008.61896	21932.25024	32.02	112.5	90.8	66	128	738.6	1	1236	2007-2008	2.259192201
50676	2	4	1	64	3	52939.84105	51794.69002	33.38	122.6	104.7	70	148	835	1	4292	2007-2008	1.228070266
50678	1	4	1	60	1	6366.211608	7225.646175	20.71	81.8	57.4	88	136	1015.5	1	1400	2007-2008	0.655959017
50679	3	3	2	74	3	33715.31325	33773.65413	32.35	112.8	84.7	32	156	1604.5	1	1333	2007-2008	1.689675257
50682	5	4	1	41	3	75464.0677	76683.04766	24.02	99.5	93.6	96	140	839.4	2	4387	2007-2008	-1.190364557
50684	1	1	2	40	1	18215.60991	21518.63266	36.39	116.2	88	56	106	551.2	2	1700	2007-2008	0.456374086
50688	4	5	2	44	3	105878.3535	111452.4162	23.18	84.5	60.3	84	120	608	1	1726	2007-2008	0.388489014
50689	2	2	1	42	3	75464.0677	76683.04766	26.32	90.5	86.6	70	120	1059.4	1	4255	2007-2008	-4.097457711
50690	3	2	1	56	2	15270.72631	16766.64396	23.26	89.7	68.4	86	132	996.6	2	1164	2007-2008	3.13216831
50691	3	1	2	44	3	32202.39505	32246.66931	22.51	90.8	66.2	80	116	855	1	1237	2007-2008	2.520167341
50695	3	5	1	53	5	94535.82528	105297.5949	31.67	116	106.4	96	144	810.3	2	3379	2007-2008	0.875506412
50696	4	4	1	70	4	9563.878561	10070.42775	24.04	93.3	80.7	84	122	652.6	2	571	2007-2008	2.498870235
50698	3	3	1	67	2	12040.76208	15643.79947	39.34	128.8	131.9	68	120	1002.6	1	1876	2007-2008	0.976473863
50702	3	3	1	40	1	26084.33129	27974.06647	37.18	126.8	120.2	70	120	445	2	4323	2007-2008	1.684048799
50703	1	1	2	61	1	4331.995844	4394.869036	29.82	99.6	67.9	60	140	1187.8	1	964	2007-2008	2.089884469
50711	1	1	1	69	2	6909.238913	7649.710766	31.83	109	74.8	60	136	1019.2	1	1817	2007-2008	-0.026761115
50712	5	NA	1	60	3	46142.08238	46517.52958	34.22	115	102.9	76	116	580.8	1	2252	2007-2008	1.107210441
50713	2	4	1	44	2	17914.46109	18473.25135	27.77	98	87.6	78	124	487.3	2	1648	2007-2008	-0.183147201
50714	4	4	2	61	1	5940.493142	7209.630645	29.15	99.5	67	64	130	988.9	1	1445	2007-2008	2.032188168
50716	3	3	2	46	1	16026.34587	15837.68447	24.16	83.2	59.4	86	124	948.5	1	2165	2007-2008	1.975133245
50718	5	5	2	44	1	23849.4058	23568.65171	18.94	76.1	45.5	58	104	1175.6	1	1245	2007-2008	2.816352266
50723	2	1	1	78	2	6124.262235	7835.050557	24.66	100.7	64.4	58	100	1027.8	1	1971	2007-2008	-2.71447484
50724	5	5	1	41	3	97704.79462	97686.21187	27.99	97.5	87.3	72	126	549.5	1	4293	2007-2008	-2.070675862
50727	1	2	1	63	4	6353.001075	6262.620111	21.1	85.9	57.8	96	160	862.6	1	3169	2007-2008	2.507216775
50730	1	1	2	63	5	21709.85827	22356.20194	17.14	71.8	46.5	58	124	689.4	1	2124	2007-2008	1.721741858
50732	4	4	1	40	4	25280.86633	25460.22417	29.89	106.1	87.8	94	124	1871.8	1	2763	2007-2008	-0.030573033
50733	5	5	1	68	3	64298.04448	65803.47224	25.35	92	73	62	88	883.2	1	1957	2007-2008	1.388064964
50740	3	3	2	76	3	42969.40373	41946.18342	25.35	94.5	58.5	72	126	1405.9	1	1245	2007-2008	2.164687712
[truncated: 10,316 more rows]
